# Supplementary material for: Family networks and infant health promotion: a mixed-methods evaluation from a cluster randomised controlled trial in rural Malawi
Source: PubMed Central journal article supplement (PMC6009513; doi:10.1136/bmjopen-2017-019380), 2018-06-07
Supplement: bmjopen-2017-019380.draft_revisions.pdf [file bmjopen-2017-019380.draft_revisions.pdf]

# BMJ Open

BMJ Open is committed to open peer review. As part of this commitment we make the peer review history of every article we publish publicly available.

When an article is published we post the peer reviewers' comments and the authors' responses online. We also post the versions of the paper that were used during peer review. These are the versions that the peer review comments apply to.

The versions of the paper that follow are the versions that were submitted during the peer review process. They are not the versions of record or the final published versions. They should not be cited or distributed as the published version of this manuscript.

BMJ Open is an open access journal and the full, final, typeset and author-corrected version of record of the manuscript is available on our site with no access controls, subscription charges or pay-per-view fees (<http://bmjopen.bmj.com>).

If you have any questions on BMJ Open's open peer review process please email [info.bmjopen@bmj.com](mailto:info.bmjopen@bmj.com)

# BMJ Open

## Family networks and infant health promotion: a mixed-methods evaluation from a cluster randomised controlled trial in rural Malawi

|                                 |                                                                                                                                                                                                                                                                                                                                                                                                                                                                                         |
|---------------------------------|-----------------------------------------------------------------------------------------------------------------------------------------------------------------------------------------------------------------------------------------------------------------------------------------------------------------------------------------------------------------------------------------------------------------------------------------------------------------------------------------|
| Journal:                        | <i>BMJ Open</i>                                                                                                                                                                                                                                                                                                                                                                                                                                                                         |
| Manuscript ID                   | bmjopen-2017-019380                                                                                                                                                                                                                                                                                                                                                                                                                                                                     |
| Article Type:                   | Research                                                                                                                                                                                                                                                                                                                                                                                                                                                                                |
| Date Submitted by the Author:   | 29-Aug-2017                                                                                                                                                                                                                                                                                                                                                                                                                                                                             |
| Complete List of Authors:       | Scott, Molly; Oxford Policy Management<br>Malde, Bansi; University of Kent, School of Economics; Insitute for Fiscal Studies, Centre for Evaluation of Development Policies<br>King, C.; UCL, Institute for Global Health<br>Phiri, Tambosi; MaiMwana Project,<br>Chapota, Hilda; MaiMwana Project,<br>Kainja, Esther; MaiMwana Project,<br>Banda, Florida; MaiMwana Project<br>Vera-Hernandez, Marcos; UCL; Insitute for Fiscal Studies, Centre for Evaluation of Development Policies |
| <b>Primary Subject Heading</b>: | Global health                                                                                                                                                                                                                                                                                                                                                                                                                                                                           |
| Secondary Subject Heading:      | Health policy                                                                                                                                                                                                                                                                                                                                                                                                                                                                           |
| Keywords:                       | Nutrition < TROPICAL MEDICINE, Extended Family, Health promotion, Sub-Saharan Africa, Child Health                                                                                                                                                                                                                                                                                                                                                                                      |
|                                 |                                                                                                                                                                                                                                                                                                                                                                                                                                                                                         |

SCHOLARONE™  
Manuscripts

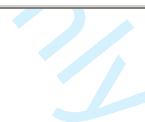

1  
2  
3 **Family networks and infant health promotion: a mixed-methods evaluation from a**  
4 **cluster randomised controlled trial in rural Malawi**  
5  
6

7 **Authors:**  
8

9 Molly Scott<sup>1</sup>, Bansi Malde<sup>3,6\*</sup>, Carina King<sup>4</sup>, Tambosi Phiri<sup>5</sup>, Hilda Chapota<sup>5</sup>, Esther Kainja<sup>5</sup>, Florida  
10 Banda<sup>5</sup>, Marcos Vera-Hernandez<sup>2,3</sup>  
11  
12

13 **Affiliations:**  
14

- 15 1. Oxford Policy Management  
16 2. Department of Economics, University College London, UK  
17 3. Centre for Evaluation of Development Policies, Institute for Fiscal Studies, London, UK  
18 4. Institute for Global Health, University College London, UK  
19 5. MaiMwana Project, Mchinji, Malawi  
20 6. School of Economics, University of Kent, UK  
21  
22

23 **\*Corresponding author:**  
24

25 School of Economics, University of Kent, Canterbury, Kent CT2 7NZ, UK. E-mail:  
26 [b.k.malde@kent.ac.uk](mailto:b.k.malde@kent.ac.uk); Telephone: (+44)(0)1227816464  
27  
28  
29

30 **Keywords:** Extended Family; Child Health; Sub-Saharan Africa; Health Promotion; Child Nutrition  
31  
32  
33  
34  
35  
36  
37  
38  
39  
40  
41  
42  
43  
44  
45  
46  
47  
48  
49  
50  
51  
52  
53  
54  
55  
56  
57  
58  
59  
60

**Abstract:**

**Objective:** Parents may rely on information provided by extended family members when making decisions concerning the health of their children. We therefore aimed to evaluate whether the success of an information intervention promoting infant health was affected by extended family members.

**Methods:** The intervention was implemented as a cluster randomised controlled trial in Mchinji district, Malawi (24 clusters total). 12 clusters were assigned to the intervention, in which all pregnant women and new mothers were eligible to receive 5 home visits from a trained peer counsellor to discuss infant care and nutrition practices; 12 clusters served as controls. We used linear multivariate regression to test whether the intervention impact on child height-for-age z-scores was influenced by the presence of extended family members. We conducted focus group discussions with mothers, grandmothers and peer counsellors, and key-informant interviews with husbands, chiefs and community health workers to gain a better understanding of the roles of extended family members in infant feeding.

**Results:** Exposure to the intervention increased child height-for-age z-scores by an average of 0.296 standard deviations ( $p=0.002$ ). However the effect size was between 0.235 ( $p=0.088$ ) and 0.253 ( $p=0.058$ ) standard deviations lower if the paternal grandmother is still alive. There was no effect of parents' siblings. Maternal grandmothers did not affect intervention impact, but were associated with a reduction in child height in the absence of the intervention. Qualitative analysis suggested that grandmothers, who act as secondary care-givers and provide resources for infants, were slower to dismiss traditionally held practices of infant feeding and adopt new messages provided by the intervention.

**Conclusion:** Overall our results point to a highly influential role for grandmothers on child health in this region. We suggest that success of the intervention could be increased if it sought to integrate senior women rather than focusing exclusively on mothers.

**Strengths and Limitations:**

- Uses mixed methods to understand how extended family members affected the success of an infant promotion program in Malawi
- Linear multivariate regressions test whether the impact of the intervention, which was implemented as a cluster randomised control trial, is influenced by different extended family members
- Quantitative analysis allows different extended family members – paternal grandmothers, maternal grandmothers, among others – to have different impacts on the program’s success
- Focus group discussions and key informant interviews help shed light on the mechanisms through which extended family members might have affected the intervention’s success

## **Introduction**

Child health outcomes are influenced by individuals besides the mother and father, with a rich literature devoted to the contribution of extended family members. In low-income settings, where risk for poor health is high and social welfare nets minimal, the support of the extended family may be crucial in child-rearing [1]. Relatives can assist by acting as secondary caregivers [2], supplying labour, donating money and providing other in-kind resources to the household [3], [4], [5], [6], [7]. Older women in the family can also influence child outcomes by dispensing infant health and nutrition advice to new mothers [8], [9], [10], [11].

Extended family members may impact on the effectiveness of policies and interventions to improve child health in low-income settings. On the one hand, they may provide resources and support that complement the intervention making it more effective, and on the other they could be resistant to change and reinforce traditional practices, thereby undermining interventions. The latter is particularly relevant in the case of health education and outreach programs, which are widespread across both developed and developing country settings.

Educational programmes have the potential to improve child health outcomes by changing widespread misconceptions or traditional behaviours around child feeding and care in low-income settings. In Malawi, for instance, although most infants are breastfed for at least a year, only 40.5% of infants are still exclusively breastfed at 5 months [12]; while diets of children aged over 6 months usually lack sufficient diversity [13],[14].

Education campaigns promoting the adoption of certain health behaviours have shown mixed success in developing country settings. While they have led to sustained increases in targeted health practices, such as exclusive breastfeeding [16], complementary feeding [11], hand washing [17] [18] and the use of a non-contaminated water source [19]; information campaigns on their own have had a negligible effect on behaviour and health in the case of worm infections in Kenya

1  
2  
3 [20];and anaemia prevention in China [21]. There is hence a need for greater understanding of  
4  
5 the factors shaping responses to health education campaigns across contexts.

6  
7  
8 Little attention has been paid to the role of extended family members in influencing the success  
9  
10 of health education interventions in the existing literature, despite their important role in shaping  
11  
12 child health.

13  
14  
15 A cluster randomised controlled trial conducted in Malawi used a peer home-education strategy  
16  
17 to improve rates of exclusive breastfeeding, and reduce infant mortality (see Lewycka et al. 2010,  
18  
19 2013 for further details [26], [25]). The trial demonstrated a 36% reduction in infant mortality and  
20  
21 an improvement in children's height-for-age z-score (HAZ) (increased by 0.271 standard  
22  
23 deviations;  $p=0.022$ ) [13] [25]. This paper uses mixed-methods to investigate whether members of  
24  
25 the extended family influenced the success of this peer home visiting intervention, and the  
26  
27 possible mechanisms through which their influence might work.

### 28 29 30 **Methods:**

31  
32  
33 This is a secondary, sequential mixed-methods study based on a cluster RCT of a peer home-  
34  
35 education intervention conducted in Mchinji District, Malawi. We investigate family member roles  
36  
37 in the success of the intervention, which provided information on infant feeding, with quantitative  
38  
39 data collected between November 2008 – January 2010, and qualitative data collected in  
40  
41 December 2015. Full details of the original trial and methods have previously been published [26]  
42  
43 [25].

### 44 45 46 **Setting:**

47  
48  
49 Mchinji is a rural district in central Malawi with a population of about 455,000 [27]. Maternal and  
50  
51 infant healthcare is delivered at one district hospital, four rural hospitals, nine health centres,  
52  
53 private clinics, and in the community through government employed community health workers  
54  
55 (CHW – known locally as Health Surveillance Assistants). Much of the healthcare received by  
56  
57

1  
2  
3 pregnant women and infants is in the community setting by CHWs, or at home by kin and other  
4  
5 social contacts. The 2010 Malawi Demographic and Health Survey reported 24% of births in the  
6  
7 region occurred in the woman's own home and 2% in someone else's home, and many births are  
8  
9 not attended by a medically trained healthcare personnel but by traditional birth attendants  
10  
11 (14.4%), friends and relatives (8.7%) or no one (2.6%) [12]. Without access to a skilled birth  
12  
13 attendant, women are more vulnerable to infection and complications during birth; the infant  
14  
15 mortality rate in 2010 was of 66 per 1000 livebirths [12].  
16  
17

18 For the RCT, Mchinji was divided into 48 approximately equal population clusters based on the  
19  
20 1998 Malawi Population and Housing census (the most recent census at the time of trial  
21  
22 planning). Within each cluster of around 8000 people, the 3000 individuals living in villages closest  
23  
24 to the geographical centre were enumerated as the eligible study population. 12 clusters were  
25  
26 assigned to the infant feeding intervention only and 12 served as controls. Full details of the trial  
27  
28 set-up and methods are in Lewycka et al., 2010 [26]. All women living in clusters assigned to the  
29  
30 infant feeding intervention who became pregnant during the trial period were eligible to receive  
31  
32 five home visits from a trained local woman volunteer ('peer counsellor') to discuss maternal and  
33  
34 infant healthcare issues; around 60% of eligible women report having been visited. The visits were  
35  
36 timed to coincide with key stages of infant development (the third trimester, and at one week,  
37  
38 one month, three and five months after birth). Each visit focused on a specific set of topics for  
39  
40 discussion, with special attention paid to nutrition practices including exclusive breastfeeding, and  
41  
42 complementary feeding. Peer counsellors were literate local women aged 23-50 years with  
43  
44 breastfeeding experience, who covered a population of about 1000 people.  
45  
46  
47

48 The intervention began in December 2004, with an initial establishment period until June 2005.  
49  
50 The trial was on-going at the time of the quantitative data collection. Following the end of the  
51  
52 trial period, peer counsellors continued to receive mentorship and supervision support from  
53  
54 government CHWs and the local implementing NGO. In 2015, at the time of qualitative data  
55  
56  
57  
58  
59  
60



1  
2  
3 collection, approximately 1/3 of the volunteer counsellors were still active in delivering the  
4  
5 intervention.

## 6 7 8 **Quantitative Analysis:**

### 9 10 Data and Sample Selection:

11  
12 A baseline census was conducted in all clusters in 2004, prior to the start of the intervention. All  
13  
14 women aged between 10 and 49 were enumerated and a random sample of 104 women aged  
15  
16 between 17 and 43 per cluster was then drawn to be interviewed for two follow-up quantitative  
17  
18 surveys as part of this secondary study. Sampled women ('main respondent' hereon) were visited  
19  
20 to complete the first follow-up in November 2008-March 2009, and a second follow-up from  
21  
22 October 2009 –January 2010.  
23  
24

25  
26 Each follow-up survey contained questions about the size of the extended family of the main  
27  
28 respondent and her husband (those alive and those in the village), the health of all household  
29  
30 members, food and liquid intake of children aged under 6 years, knowledge about child nutrition,  
31  
32 intervention participation (in treatment clusters), and socio-economic variables such as adult  
33  
34 work. The height of the main respondent and the height and weight of children under 6 years was  
35  
36 also collected.  
37  
38

39  
40 The sample was balanced between treatment and control clusters along a range of variables  
41  
42 collected at baseline (see Fitzsimons et al (2016), Table 1 [13]). Balance was preserved after  
43  
44 accounting for attrition between the baseline and first endline survey, indicating that  
45  
46 randomisation was not jeopardised.  
47  
48

49  
50 For the analysis we use a sample of children who were born since July 2005; and whose mothers  
51  
52 are married main respondents in the follow-up surveys (80% of the sample). This sample selection  
53  
54 ensures that we measure effects on children whose mothers were eligible to receive visits from a  
55  
56  
57  
58  
59  
60

peer counsellor; and allows us to compare effects of the mothers' relatives with those of her husband.

### Model Specification and Estimation

The quantitative analysis aims to determine how different family members influence the effectiveness of the infant feeding intervention. The main outcome for our analysis is child height-for-age z-score (HAZ score), which is a long term indicator of health that reflects nutrition and morbidity since birth, and should be sensitive to any effects of intervention exposure in early life. It is calculated by comparing the height of the child with the median height in the WHO reference population of children of the same gender and age in months [28].

The main specification is estimated using the following linear multivariate regression:

$$\begin{aligned}
 HAZ_{ij} = & \alpha + \beta T_j + \beta_2 \text{Maternal\_grandmother}_{ij} + \beta_3 \text{Maternal\_grandmother}_{ij} * T_j \\
 & + \beta_4 \text{Paternal\_grandmother}_{ij} + \beta_5 \text{Paternal\_grandmother}_{ij} * T_j \\
 & + \beta_6 \text{Total\_mothers\_siblings}_{ij} + \beta_7 \text{Total\_mothers\_siblings}_{ij} * T_j \\
 & + \beta_8 \text{Total\_fathers\_siblings}_{ij} + \beta_9 \text{Total\_fathers\_siblings}_{ij} * T_j + X_{ij} \gamma \\
 & + Z_j \gamma_2 + \epsilon_{ij}
 \end{aligned}$$

$T_j$  is a treatment exposure indicator which captures whether the child was living in a cluster that was assigned in 2004 to receive the program. We therefore use an intent-to-treat estimator.  $\text{Maternal\_grandmother}_{ij}$  and  $\text{Paternal\_grandmother}_{ij}$  are binary variables indicating, respectively, whether the maternal and paternal grandmother are alive.  $\text{Total\_mothers\_siblings}_{ij}$  captures the total number of siblings of the child's mother who are alive. The exact definition of this variable varies across specifications. In the first specification, brothers and sisters of each parent enter the regression equation separately, while the second specification includes the total siblings of each parent.  $X_{ij}$  and  $Z_j$  are vectors of control variables at the individual (denoted  $i$ ) and cluster level (denoted  $j$ ) respectively. Among the controls we include are all variables where significant

1  
2  
3 differences between households with different extended family members alive were detected in  
4  
5 Table 3. We do not adjust the data for missing information.  
6

7  
8 Errors  $\epsilon_{ij}$  are assumed to be uncorrelated between individuals in different clusters but are allowed  
9  
10 an unrestricted correlation structure within clusters. To account for correlation within clusters,  
11  
12 standard errors must be adjusted to prevent downward bias. Given the small number of clusters  
13  
14 included in the study design (12 intervention and 12 control clusters), we adopt wild cluster  
15  
16 bootstrap methods as recommended in Cameron et al. (2008) [29]. The bootstrap adjustment  
17  
18 applied here was studied in detail by Fitzsimons et al (2016) and was found to perform well [13].  
19  
20 Data from both follow-up surveys is pooled to improve statistical power.  
21

22  
23 The extended family network is defined according to which members of the family are alive,  
24  
25 rather than which ones live in the same village or household. This is in case treatment exposure  
26  
27 affected decisions over where to live. The benefit of defining the size of the family network  
28  
29 according to which members are alive is that this is almost certain to be invariant to program  
30  
31 exposure.  
32

33  
34 We choose to define  $T_j$  by exposure to the intervention rather than actual participation since  
35  
36 participation in the program was voluntary and also relied on the ability of peer counsellors to  
37  
38 locate eligible women. Women who peer counsellors did not manage to trace or who chose not  
39  
40 to take part in the program may be different from those who did participate, potentially  
41  
42 introducing some unobserved correlation between the treatment interaction variables and HAZ  
43  
44 scores if  $T_j$  were defined on the basis of actual participation. Indeed, Fitzsimons et al. (2016)  
45  
46 report that women who received the visits tend to be poorer. Defining treatment based on  
47  
48 residence at baseline rather than at the time of the follow-up interviews also alleviates concerns  
49  
50 of bias in case there was purposeful migration into treated areas by control-group assigned  
51  
52 households.  
53  
54  
55  
56  
57

### Qualitative Analysis

To gain a more in-depth understanding of family roles and how grandmothers might influence child health, we conducted focus group discussions (FGDs) with grandmothers, mothers and peer counsellors, and semi-structured interviews with fathers, CHWs and village chiefs in late 2015.

### Recruitment

Participants were recruited from 11 of 24 intervention and control clusters across the district. Mothers, grandmothers and fathers were purposefully selected by CHWs and chiefs to represent those households who had actively received the intervention or had children under-5 years in control clusters. Volunteer peer counsellors were contacted directly, to represent a range of ages and years' experience as counsellors. Chiefs and CHWs were purposefully selected and contacted directly to represent clusters with a range of engagement with the intervention.

### Data Collection:

FGDs and interviews covered the following topics: household decision making around feeding, infant feeding practices, feeding knowledge and sources of information about infant feeding. We asked about all household members, and specifically about the role of grandmothers. All discussions were facilitated by two local trained qualitative researchers in Chichewa within the communities. Participants were reimbursed for their travel expenses and given refreshments. All discussions were recorded, and translated and transcribed by TP, EK, HC and FB as a group; final translations agreed between the researchers.

### Analysis

The English transcripts were coded using an inductive framework approach based on the following steps: familiarisation, coding, developing and applying the framework, charting and interpretation [30]. The transcripts were coded as a group by TP, EK, HC and FB and

1  
2  
3 independently by CK; this was done on paper and the coding matrix developed in Microsoft Excel.  
4  
5 The framework and interpretation was agreed through discussion between TP, EK, HC, FB and CK  
6  
7 until agreement was reached between the researchers.  
8  
9

### 10 **Ethics**

11  
12 All participants gave informed written consent. Ethical approval to conduct this study was  
13  
14 obtained from the National Health Sciences Research Committee in Malawi [Protocol Numbers:  
15  
16 491; 15/9/1483].  
17  
18

### 19 **Results**

#### 20 Quantitative Analysis:

21  
22  
23  
24  
25  
26 Table 1 presents basic demographic and socio-economic information about women included in  
27  
28 the quantitative analysis and their households at baseline. Amongst those assigned to the control  
29  
30 group, the average age was 24.6 years, 71.8% were married and while 70.1% had completed at  
31  
32 least primary education, only 7.6% had completed secondary education. In line with the general  
33  
34 profile of communities in Mchinji, 95.4% of women in the sample were Chewa ethnicity and  
35  
36 98.3% were Christian. The average household size was 5.6 members and all households were  
37  
38 engaged in agricultural activity.  
39  
40

41  
42 Table 2 presents information from both follow-up surveys about the size of extended family  
43  
44 networks of the children included in our analysis sample. It shows that most children have their  
45  
46 grandmothers alive (87.3% have maternal grandmothers alive and 80.7% have paternal  
47  
48 grandmothers). Moreover, their parents have a relatively large number of siblings, with an  
49  
50 average of more than two brothers and two sisters each.  
51

52  
53 In Table 3 we report the results of a series of linear multivariate regressions which compare the  
54  
55 baseline characteristics of mothers and their households according to which members of the  
56  
57

1  
2  
3 extended family are alive. It indicates that children whose grandmothers are alive have on average  
4 younger mothers, who are more likely to have completed at least primary education, less likely to be  
5 working as farmers in 2004, and are from more socioeconomically advantaged households, as  
6 measured by a composite wealth index.  
7  
8  
9

10  
11 Table 4 displays the results of the quantitative analysis on child HAZ scores. Column 1 shows that  
12 overall exposure to the program raised HAZ scores by 0.296 ( $p=0.002$ ) standard deviations (SD).  
13  
14 Columns 2 and 3 present the results for the regressions that test whether family members  
15 influenced the effectiveness of the intervention on child HAZ scores. The results show that the  
16 effect of the intervention is not heterogeneous according to the number of parents' siblings.  
17  
18 However, the effect of the intervention on HAZ scores is between 0.235 ( $p=0.058$ ) and 0.253  
19 ( $p=0.088$ ) SD smaller for children whose paternal grandmother is alive. The results suggest that  
20 maternal grandmothers are associated with lower child health outcomes in the absence of the  
21 intervention.  
22  
23  
24  
25  
26  
27  
28  
29

### 30 31 Qualitative Analysis:

32  
33 We conducted five FGDs, with 37 participants of 48 invited (mothers=16; grandmothers=15; peer  
34 counsellors=6), and ten semi-structured interviews (village chiefs=4, fathers=4; CHW=2). We  
35 defined the following emergent themes in relation to grandmothers and their role in infant  
36 feeding and growth: decision making roles, knowledge and information, traditional practices and  
37 intervention successes and challenges around behaviour change.  
38  
39  
40  
41  
42  
43  
44  
45

46 **Decision-Making Roles:** Across the respondents there was agreement that the father is responsible  
47 for resource allocation and mobilisation, while the mother's role is to manage and prepare food for  
48 the household. When there is a lack of food or resources, extended family members or neighbours  
49 can provide assistance, for example "*maybe you have found you don't even have flour, our sister in  
50 law or mother in law gives it to you saying that it's only for the child, prepare porridge so that it  
51*  
52  
53  
54  
55  
56  
57  
58  
59  
60

1  
2  
3 *should eat*" (Mother, Control). Within the household, grandmothers, both maternal and paternal,  
4  
5 were generally viewed as the secondary caregivers, providing support by cooking for and feeding  
6  
7 infants.

8  
9  
10 **Information and Knowledge:** Sources of information about infant feeding included: antenatal clinics  
11  
12 and other healthcare, family members, village chiefs and community meetings, the peer counsellor  
13  
14 intervention and other NGOs and civil society education programmes. Interestingly, the peer  
15  
16 counsellors were reported as a source of information by participants from control areas, likely  
17  
18 reflecting contamination following the end of the trial period. Although grandmothers report giving  
19  
20 similar advice as that given by healthcare workers:

21  
22  
23 *"now we are afraid, so we provide the same advice they give at the clinic, so we tell them the same*  
24  
25 *things"* (Grandmother, Intervention),

26  
27  
28 However, reports from peer counselors cast doubt on this. They instead mentioned encountering  
29  
30 difficulties with grandmothers when disseminating their advice: *"frequently the grandmothers*  
31  
32 *mislead, mislead them as they say what they were doing before in their time"* (Peer Counselor).

33  
34  
35 Peer counselors, however, also noticed a change over time in attitudes among grandmothers, with  
36  
37 increased acceptance of the intervention messages: *"the group of relatives which gives the most*  
38  
39 *problems is the grandparents because they tell the woman that 'aaah [the counselors] are just*  
40  
41 *cheating you they want this child to be crying' [...] but we have seen that the grandmothers now*  
42  
43 *have understood"* (Peer Counselor).

44  
45  
46 Despite not being the focus of the intervention, breastfeeding, weaning and complementary feeding  
47  
48 messages appear to have disseminated among the extended family, with fathers (*"advice about*  
49  
50 *breast feeding, I know a lot; when a child is born he should breast feed exclusively, very frequently"* -  
51  
52 Father, Intervention) and grandmothers (*"so they say breastfeed frequently these days, that's the*  
53  
54

1  
2  
3 *modern way of childbirth, so you also say breastfeed the child” - Grandmother, Intervention)*

4  
5 demonstrating accurate knowledge.

6  
7  
8 **Traditional Practices:** Traditional practices, such as adding traditional medicinal herbs to infants’  
9  
10 porridge, were mentioned in relation to infant health and feeding. However, mothers and  
11  
12 grandmothers in both intervention and control areas commented that while these practices are  
13  
14 known, they are no longer commonplace or are done in hiding. This was confirmed by one of the  
15  
16 CHW who commented that: *“while the grandmothers and the other people have their own beliefs,*  
17  
18 *our role is to get rid of those beliefs [...] little by little people change”* (CHW, Intervention).  
19

20  
21 **Behaviour Change:** Community members reported sustained behaviour change relating to exclusive  
22  
23 breastfeeding and facility-based deliveries: *“behaviour these days has changed in that delivering at*  
24  
25 *home is no longer there [...] we say go to the hospital”* (Grandmother, Intervention). However, CHW  
26  
27 and peer counselors noted that these changes were not seen immediately, and that barriers such as  
28  
29 lack of engagement, lack of understanding and cultural issues (e.g. urban women ‘looking down’ on  
30  
31 the counselors) were present.  
32

### 33 34 **Discussion:**

35  
36  
37 Our mixed-methods evaluation of the effect of extended family members on the impact of a peer-  
38  
39 led home education intervention in rural Malawi suggests that living grandmothers can be a  
40  
41 barrier to intervention dissemination and behaviour change. The qualitative findings complement  
42  
43 the quantitative results, and suggest the mechanism through which grandmothers may influence  
44  
45 the effectiveness of the peer intervention.  
46

47  
48 The apparently negative influence of paternal grandmothers on intervention success may be due  
49  
50 to a conflict between their views on infant feeding from the recommendations of peer  
51  
52 counsellors. The qualitative findings offer some support for this hypothesis by providing evidence  
53  
54 that grandmothers are proponents of traditional views of child feeding that differ from standard  
55  
56  
57



1  
2  
3 recommendations, supported by previous studies [9], [8]. They indicate that grandmothers persist  
4  
5 in their traditional beliefs for longer, and as providers of both financial and childcare support,  
6  
7 exert influence towards their own beliefs of child feeding rather than towards the information  
8  
9 provided by the intervention. Reassuringly though, our data suggest that grandmothers  
10  
11 eventually adjust their practices to be in line with the information provided by the intervention.  
12

13  
14 Though the qualitative information did not show any distinction between paternal and maternal  
15  
16 grandmothers, there is evidence that, at least in Malawi, it is paternal grandmothers who  
17  
18 command the most influence [8]. This may explain the fact that we do not see a similar  
19  
20 quantitative result associated with maternal grandmothers.  
21

22  
23 The delays seen in attitude change amongst grandmothers suggest that there may be potential to  
24  
25 increase the intervention's impact further by engaging extended family members in the  
26  
27 information exchange process. A growing body of evidence underscores the benefits of more  
28  
29 inclusive approaches to health education [31], [8], [10], [11], and cautions against assuming that  
30  
31 new information will necessarily be incorporated into knowledge and behaviour. Actual response  
32  
33 will, in general, depend on the mode of transmission. Approaches which treat users of  
34  
35 information as passive are less likely to be effective than those which foster dialogue within the  
36  
37 target communities.  
38  
39

40  
41 In contexts where older women exert particular influence there are clear grounds for designing  
42  
43 interventions that respect and acknowledge their seniority. The rationale behind the work of  
44  
45 organisations like the Grandmother Project is that elder women can act as powerful agents for  
46  
47 change if they are mobilised and empowered to support intervention aims [9], [8]. We consider  
48  
49 our findings to provide support for this agenda. However, it must be noted that involving senior  
50  
51 women in interventions might not be sufficient to improve child health, particularly in contexts  
52  
53 where poor nutrition is not the only cause for poor health. Evidence from the evaluation of an  
54  
55 integrated agriculture and nutrition and health behaviour change communication programme  
56  
57

1  
2  
3 indicates that senior women can be effective in changing knowledge, but this improved  
4  
5 knowledge might still fail to yield improvements in child growth [11].  
6

7  
8 The qualitative findings also raise the importance of the role of men as key providers and resource  
9  
10 mobilisers. Quantitative evidence found in Fitzsimons et al (2016) supports the critical role of  
11  
12 males in ensuring adoption of the information provided. Therefore, integrating these influential  
13  
14 figures with the peer counsellor intervention may help improve uptake and reduce the time to  
15  
16 intervention acceptance we currently observe.  
17

18  
19 In this study there were several limitations. Firstly, it is impossible to ascertain whether the  
20  
21 estimated quantitative detrimental effect of grandmothers is due to their presence and not  
22  
23 because households in which the paternal grandmother is alive are different in some  
24  
25 characteristic that is omitted from the regression and that affects the effectiveness of the  
26  
27 intervention. The survey and qualitative data may be subject to social desirability bias, with  
28  
29 respondents providing answers which they think will please the researchers. As the qualitative  
30  
31 and quantitative data triangulated, and respondents were not aware of our hypothesis, we do not  
32  
33 feel this considerably biased our conclusions. Finally, the qualitative and quantitative data were  
34  
35 collected sequentially rather than concurrently, making interpretation more challenging. The  
36  
37 qualitative data was planned to provide a more in-depth understanding of the quantitative  
38  
39 findings, rather than drawing conclusions on causality, therefore we do not feel this detracts from  
40  
41 the interpretation.  
42  
43

44  
45 We found that grandmothers play an important role in shaping responses to an information  
46  
47 campaign targeting infant health. In order to increase the impact of information campaigns, our  
48  
49 findings suggest that excluding influential older women who act as both important sources of  
50  
51 advice and childcare support, can weaken intervention impact by exposing a divergence between  
52  
53 traditional views and new information. Inclusive health education approaches which respect the  
54  
55

1  
2  
3  
4  
5  
6  
7  
8  
9  
10  
11  
12  
13  
14  
15  
16  
17  
18  
19  
20  
21  
22  
23  
24  
25  
26  
27  
28  
29  
30  
31  
32  
33  
34  
35  
36  
37  
38  
39  
40  
41  
42  
43  
44  
45  
46  
47  
48  
49  
50  
51  
52  
53  
54  
55  
56  
57  
58  
59  
60

need to tackle existing traditional beliefs and the roles which grandmothers play, may overcome this friction and improve the effectiveness of the intervention.

For peer review only

1  
2  
3 Acknowledgements: We thank Andrew Mganga, Nicholas Mbwana, Christopher Kamphinga, Sonia  
4 Lewycka, Mikey Rosato and Julia Behrman for advice and assistance with quantitative data  
5 collection.

6  
7 Funding: Funding from the ESRC/DFID grant ES/J009253/1 if gratefully acknowledged.

8  
9 Conflict of interest: We declare that we have no conflicts of interest.

10  
11 Authors contributions: All authors provided final approval of the version to be published. Concept  
12 and design of quantitative analysis: MS, BM and MV; analysis and interpretation of quantitative  
13 findings: MS, MV and BM; drafting the article and revising it critically: MS, BM, CK and MV.  
14 Concept and design of the qualitative study: BM, MVH, CK and TP. Qualitative data collection and  
15 analysis: TP, HC, EK, FB. Qualitative analysis was independently checked and coded: CK. CK, TP, EK,  
16 HC and FB discussed and agreed the final interpretation.

17  
18  
19 Data sharing: The raw quantitative data is available for download from the UK Data Archive.  
20  
21  
22  
23  
24  
25  
26  
27  
28  
29  
30  
31  
32  
33  
34  
35  
36  
37  
38  
39  
40  
41  
42  
43  
44  
45  
46  
47  
48  
49  
50  
51  
52  
53  
54  
55  
56  
57  
58  
59  
60

## References

- [1] S. B. Hrdy, "Mother nature: A history of mothers, infants, and natural selection.," *New York*, 1999.
- [2] P. K. Ivey, "Cooperative Reproduction in Ituri Forest Hunter-Gatherers: Who Cares for Efe Infants? 1.," *Current Anthropology*, 41.5, pp. 856-866, 2000.
- [3] M. A. Gibson and R. Mace, "Helpful Grandmothers in rural Ethiopia: A study of the effect of kin on child survival and growth," *Evolution and Human Behaviour* 26(6), pp. 469-482, 2005.
- [4] R. Lee and K. Kramer, "Children's Economic Roles in the Maya Family Life Cycle: Cain, Caldwell, & Chayanov Revisited," *Population and Development Review*, Vol. 28, No. 3, pp. 475-499, 2002.
- [5] M. Angelucci, G. De Giorgi, M. Rangel and I. Rasul, "Family networks and school enrolment: Evidence from a randomised social experiment.," *Journal of Public Economics*, 94(3), pp. 197-221, 2010.
- [6] D. LaFave and D. Thomas, "Extended Families and Child Well-being," *NBER Working Paper Series, Working Paper 20702*, <http://www.nber.org/papers/w20702>, 2014.
- [7] E. Duflo, "Grandmothers and Granddaughters: Old-Age Pensions and Intrahousehold Allocation in South Africa," *World Bank Economic Review*, vol. 17, no. 1, pp. 1-25, 2003.
- [8] R. Bezner-Kerr, L. Dakishoni, L. Shumba, R. Msachi and M. Chirwa, ""We grandmothers know plenty": breastfeeding, complementary feeding and the multifaceted role of grandmothers in Malawi.," *Social Science & Medicine*, 66(5), pp. 1095-1105, 2008.
- [9] J. Aubel, I. Touré and M. Diagne, "Senegalese grandmothers promote improved maternal and child nutrition practices: the guardians of traditional are not averse to change.," *Social Science & Medicine*, 59(5), pp. 945-959, 2004.
- [10] J. Aubel and D. Sihalathavong, "Participatory communication to strengthen to role of grandmothers in child health: an alternative paradigm for health education and health communication.," *Journal of International Communication*, 7(2), pp. 76-97, 2001.
- [11] D. K. Olney, A. Pedehombga, M. T. Ruel and A. Dillon, "A 2-Year Integrated Agriculture and Nutrition and Health Behavior Change Communication Program Targeted to Women in Burkina Faso Reduces Anemia, Wasting and Diarrhea in Children 3-12.9 Months of Age at Baseline: A Cluster-Randomized Controlled Trial," *The Journal of Nutrition*, vol. 145, no. 6, pp. 1317 - 1324, 2015.
- [12] National Statistical Office, Malawi, Macro ORC, "Malawi Demographic and Health Survey," Zomba: Malawi National Statistical Office, Macro ORC, 2004.

- 1  
2  
3 [13] E. Fitzsimons, B. Malde, A. Mesnard and M. Vera-Hernandez, "Nutrition, Information, and  
4 Household Behaviour: Experimental Evidence from Malawi," *Journal of Development*  
5 *Economics*, vol. 122, pp. 113-126, 2016.  
6  
7 [14] R. Haider, A. Ashworth, I. Kabir and S. R. Huttly, "Effect of community-based peer counsellors on  
8 exclusive breastfeeding practices in Dhaka, Bangladesh: a randomised controlled trial.," *The*  
9 *Lancet*, 356(9242), pp. 1643-1647, 2000.  
10  
11 [15] B. F. Kalanda, F. H. Verhoeff and B. J. Brabin, "Breast and complementary feeding practices in  
12 relation to morbidity and growth in Malawian infants.," *European journal of clinical nutrition*,  
13 60(3), pp. 401-407, 2006.  
14  
15 [16] A. L. Morrow, M. L. Guerrero, J. Shults, J. Calva, C. Lutter, J. Bravo, G. Ruiz-Palacios, R. Morrow  
16 and F. Butterfoss, "Efficacy of home-based peer counselling to promote exclusive breastfeeding:  
17 a randomised controlled trial.," *The Lancet*, 353(9160), pp. 1226-1231, 1999.  
18  
19 [17] S. Cairncross, K. Shordt, S. Zacharia and B. K. Govindan, "What causes sustainable changes in  
20 hygiene behaviour? A cross-sectional study from Kerala, India.," *Social Science & Medicine*, ,  
21 61(10), pp. 2212-2220, 2005.  
22  
23 [18] A. Bowen, H. Ma, J. Ou, W. Billhimer, T. Long, E. Mintz, R. M. Hoekstra and S. Luby, "A cluster-  
24 randomized controlled trial evaluating the effect of a handwashing-promotion program in  
25 Chinese primary schools.," *The American journal of tropical medicine and hygiene*, 76(6), pp.  
26 1166-1173, 2007.  
27  
28 [19] M. Madajewicz, A. Pfaff, A. van Geen, J. Graziano, I. Hussein, H. Momotaj, R. Sylvi and H. Ahsan,  
29 "Can information alone change behavior? Response to arsenic contamination of groundwater in  
30 Bangladesh.," *Journal of Development Economics*, 84(2), pp. 731-754, 2007.  
31  
32 [20] E. Miguel and M. Kremer, "The Illusion of Sustainability," *The Quarterly journal of economics*,  
33 122(3), pp. 1007-1065, 2007.  
34  
35 [21] R. Luo, Y. Shi, Z. L., H. Zhang, G. Miller, A. Medina and S. Rozelle, "The limits of health and  
36 nutrition education: evidence from three randomized-controlled trials in rural China," *CESifo*  
37 *Economic Studies*, 58(2), pp. 385-404, 2012.  
38  
39 [22] P. Dupas, "Health behavior in developing countries.," *Annual Review of Economics*, 3(1), pp.  
40 425-449, 2011.  
41  
42 [23] J. Meredith, J. Robinson, S. Walker and B. Wydick, "Keeping the doctor away: Experimental  
43 evidence on investment in preventative health products," *Journal of Development Economics*,  
44 105, pp. 196-210, 2013.  
45  
46 [24] H. Moestue, S. Huttly, L. Sarella and S. Galeb, "'The bigger the better' - mothers' social networks  
47 and child nutrition in Andhra Pradesh," *Public health nutrition* 10(11), pp. 1274-1282, 2007.  
48  
49  
50  
51  
52  
53  
54  
55  
56  
57  
58  
59  
60

- 1  
2  
3 [25] S. Lewycka, C. Mwansambo, M. Rosato, P. Kazembe, T. Phiri, A. Mganga, H. Chapota, F.  
4 Malamba, E. Kainja, M. Newell, G. Greco, A. Pulkki-Brännström, J. Skordis-Worrall, S. Vergnano,  
5 D. Orsin and A. Costello, "Effect of women's groups and volunteer peer counselling on rates of  
6 mortality, morbidity, and health behaviours in mothers and children in rural Malawi  
7 (MaiMwana): a factorial, cluster-randomised controlled trial.," *The Lancet*, 381(9879), pp. 1721-  
8 1735, 2013.  
9  
10  
11 [26] S. Lewycka, C. Mwansambo, P. Kazembe, T. Phiri, A. Mganga, M. Rosato, H. Chapota, F.  
12 Malamba, S. Vergnano, M. Newell, D. Orsin and A. Costello, "A cluster randomised controlled  
13 trial of the community effectiveness of two interventions in rural Malawi to improve health care  
14 and to reduce maternal, newborn and infant mortality," *Trials*, 11(1), 88, 2010.  
15  
16  
17 [27] National Statistical Office, Malawi, "National Population and Housing Census: Analytical  
18 Report," 1998.  
19  
20  
21 [28] WHO Anthro for personal computers, version 3.2.2, *Software for assessing growth and*  
22 *development of the world's children.*, Geneva: WHO, 2011.  
23  
24 [29] A. C. Cameron, J. B. Gelbach and D. L. Miller, "Bootstrap-based improvements for inference with  
25 clustered errors.," *The Review of Economics and Statistics*, 90(3), pp. 414-427, 2008.  
26  
27 [30] N. K. Gale, G. Heath, E. Cameron, S. Rashid and S. Redwood, "Using the Framework Method for  
28 the Analysis of Qualitative Data in Multi-Disciplinary Health Research," *BMC Medical Research*  
29 *Methodology*, vol. 13:117, 2013.  
30  
31  
32 [31] R. G. Lee and T. Garvin, "Moving from information transfer to information exchange in health  
33 and health care.," *Social science & medicine*, 56(3), pp. 449-464, 2003.  
34  
35 [32] R. Sear and D. Coall, "How much does family matter? Cooperative breeding and the  
36 demographic transition.," *Population and Development Review*, pp. 81-112, 2011.  
37  
38 [33] W. D. Hamilton, "The moulding of senescence by natural selection.," *Journal of theoretical*  
39 *biology*, 12(1), pp. 12-45, 1966.  
40  
41 [34] K. Hawkes, "Grandmothers and the evolution of human longevity.," *American Journal of Human*  
42 *Biology*, 15(3), pp. 380-400, 2003.  
43  
44 [35] R. Sear, "Kin and child survival in rural Malawi," *Human Nature*, 19(3), pp. 277-293, 2008.  
45  
46 [36] G. Reniers and R. Tfamily, "Polygyny and HIV in Malawi.," *Demographic Research*, 19(53), p. 1811,  
47 2008.  
48  
49 [37] T. Takane, "Tobacco and smallholders in Malawi: village case studies in the Mchinji and  
50 Mangochi Districts.," *African Research Series*, 93-119., 2005.  
51  
52 [38] S. A. West, I. Pen and A. S. Griffin, "Cooperation and competition between relatives.," *Science*,  
53  
54  
55  
56  
57  
58  
59  
60

1  
2  
3 296(5565), pp. 72-75, 2002.  
4

- 5 [39] R. Bezner-Kerr, P. R. Berti and M. Chirwa, "Breastfeeding and mixed feeding practices in Malawi:  
6 Timing, reasons, decision makers, and child health consequences.," *Food & Nutrition Bulletin*,  
7 28(1), pp. 90-99, 2007.  
8  
9  
10  
11  
12  
13  
14  
15  
16  
17  
18  
19  
20  
21  
22  
23  
24  
25  
26  
27  
28  
29  
30  
31  
32  
33  
34  
35  
36  
37  
38  
39  
40  
41  
42  
43  
44  
45  
46  
47  
48  
49  
50  
51  
52  
53  
54  
55  
56  
57  
58  
59  
60

For peer review only



1  
2  
3 **Tables**  
4  
5

6 **TABLE 1: Randomisation balance**  
7

8

|                                            | Analysis sample |                                    |         |
|--------------------------------------------|-----------------|------------------------------------|---------|
|                                            | Control group   | Difference:<br>treatment - control | p value |
| <b>Household characteristics</b>           |                 |                                    |         |
| Number of members                          | 5.621           | 0.114                              | 0.875   |
| Number of sleeping rooms                   | 2.036           | 0.232                              | 0.034** |
| Household has electricity?                 | 0.002           | 0.000                              | 0.827   |
| Household has radio?                       | 0.651           | 0.004                              | 0.897   |
| Household has bicycle?                     | 0.499           | 0.019                              | 0.699   |
| Household has motorbike?                   | 0.008           | -0.001                             | 0.879   |
| Household has paraffin lamp?               | 0.939           | 0.017                              | 0.815   |
| Household has oxcart?                      | 0.051           | -0.019                             | 0.198   |
| Agricultural                               | 1.000           | -0.002                             | 0.422   |
| Main flooring material: dirt, sand or dung | 0.924           | -0.017                             | 0.565   |
| Main roofing material: natural material    | 0.876           | -0.017                             | 0.697   |
| Piped water                                | 0.015           | 0.022                              | 0.494   |
| Traditional pit toilet                     | 0.783           | 0.044                              | 0.356   |
| <b>Woman characteristics</b>               |                 |                                    |         |
| Married                                    | 0.718           | -0.049                             | 0.046** |
| Completed primary education                | 0.709           | 0.028                              | 0.529   |
| Completed secondary education              | 0.076           | -0.022                             | 0.268   |
| Age                                        | 24.592          | -0.993                             | 0.026** |
| Chewa                                      | 0.954           | -0.039                             | 0.452   |
| Christian                                  | 0.983           | 0.005                              | 0.609   |
| Farmer                                     | 0.709           | -0.045                             | 0.316   |
| Student                                    | 0.164           | 0.023                              | 0.380   |
| Small business owner                       | 0.040           | 0.021                              | 0.356   |
| N                                          | 411             | 475                                |         |

9  
10  
11  
12  
13  
14  
15  
16  
17  
18  
19  
20  
21  
22  
23  
24  
25  
26  
27  
28  
29  
30  
31  
32  
33  
34  
35  
36  
37  
38  
39  
40

41  
42 Notes: Household and mother level characteristics in 2004 corresponding to the sample of children used for  
43 analysis. The analysis sample contains children born since July 2005 to married main respondent mothers.  
44 The sample is here restricted to one child per household and data is taken from the second follow-up  
45 survey only, in which sampled children were aged 0-53 months.

46 \*= p<0.1, \*\*=p<0.05, \*\*\*=p<0.01

47 p values are calculated using the wild cluster bootstrap-t procedure outlined in Cameron et al. (2008).  
48  
49  
50  
51  
52  
53  
54  
55  
56  
57

**TABLE 2: Extended family networks of sampled children.**

|                            | Control group | Difference:<br>treatment -<br>control | p value | N    |
|----------------------------|---------------|---------------------------------------|---------|------|
| Maternal grandmother (0/1) | 0.873         | 0.012                                 | 0.739   | 2260 |
| Paternal grandmother (0/1) | 0.807         | 0.063                                 | 0.132   | 2252 |
| Mothers sisters            | 2.835         | 0.047                                 | 0.835   | 2266 |
| Mothers brothers           | 2.556         | 0.207                                 | 0.180   | 2263 |
| Fathers sisters            | 2.336         | 0.246                                 | 0.290   | 2266 |
| Fathers brothers           | 2.453         | 0.213                                 | 0.288   | 2267 |

Notes: Mean number of extended family members alive. Sample is all children born since July 2005, who were aged 0-53 months at the time of interview. A pooled dataset from both follow-up surveys is used to construct means.

**Table 3: Relationship between baseline characteristics and family network size**

Panel A: Household characteristics

|                                  | # members                    | # rooms                     | wealth Index                  |
|----------------------------------|------------------------------|-----------------------------|-------------------------------|
| Maternal grandmother alive (0/1) | 0.027<br>(0.307)<br>{0.929}  | -0.04<br>(0.103)<br>{0.779} | 0.256**<br>(0.114)<br>{0.032} |
| Paternal grandmother alive (0/1) | -0.209<br>(0.276)<br>{0.478} | -0.02<br>(0.094)<br>{0.919} | -0.129<br>(0.186)<br>{0.549}  |
| Parents siblings alive           | 0.025<br>(0.037)<br>{0.627}  | 0.01<br>(0.011)<br>{0.400}  | 0.016<br>(0.011)<br>{0.144}   |
| N                                | 881                          | 879                         | 881                           |

Panel B: Mother characteristics

|                            | Primary education             | Secondary education          | Age                             | Chewa                       | Christian                    | Farmer                        | Student                         | Small business owner          |
|----------------------------|-------------------------------|------------------------------|---------------------------------|-----------------------------|------------------------------|-------------------------------|---------------------------------|-------------------------------|
| Maternal grandmother alive | 0.124*<br>(0.057)<br>{0.056}  | -0.028<br>(0.033)<br>{0.396} | -4.463***<br>(0.687)<br>{0.002} | 0.01<br>(0.039)<br>{0.863}  | -0.007<br>(0.010)<br>{0.657} | -0.111*<br>(0.054)<br>{0.056} | 0.150***<br>(0.033)<br>{0.002}  | -0.046<br>(0.029)<br>{0.160}  |
| Paternal grandmother alive | 0.071**<br>(0.032)<br>{0.028} | -0.004<br>(0.029)<br>{0.871} | -2.845***<br>(0.563)<br>{0.002} | 0.005<br>(0.023)<br>{0.853} | 0.009<br>(0.012)<br>{0.569}  | -0.01<br>(0.036)<br>{0.739}   | 0.04<br>(0.024)<br>{0.104}      | -0.024<br>(0.027)<br>{0.370}  |
| Parents siblings alive     | -0.004<br>(0.004)<br>{0.346}  | 0<br>(0.002)<br>{0.925}      | 0.044<br>(0.069)<br>{0.537}     | 0.007<br>(0.005)<br>{0.228} | 0<br>(0.001)<br>{0.462}      | 0.012**<br>(0.004)<br>{0.024} | -0.011***<br>(0.003)<br>{0.004} | -0.003*<br>(0.001)<br>{0.074} |
| N                          | 881                           | 881                          | 881                             | 881                         | 881                          | 881                           | 881                             | 881                           |

Notes: OLS regressions of with baseline characteristics gathered in 2004 as the dependent variable and family networks as independent variables. The sample contains children born since July 2005 with married, main respondent mothers. Data is from the second follow-up survey only and restricted to one eligible-aged child per household. Standard errors computed using the cluster correlated Huber-White estimator are reported in parentheses and p-values in curly brackets. P values are calculated using the wild cluster bootstrap-t procedure outlined in Cameron et al. (2008).

\*= p<0.1, \*\*=p<0.05, \*\*\*=p<0.01

**TABLE 4: Height-for-age scores**

|                            | (1)      | (2)      | (3)      |
|----------------------------|----------|----------|----------|
| Treatment                  | 0.296*** | 0.441    | 0.467    |
|                            | {0.002}  | {0.172}  | {0.150}  |
| Maternal grandmother       |          | -0.265** | -0.259** |
|                            |          | {0.048}  | {0.048}  |
| Maternal grandmother*T     |          | 0.168    | 0.145    |
|                            |          | {0.503}  | {0.557}  |
| Paternal grandmother       |          | 0.008    | 0.006    |
|                            |          | {0.991}  | {0.995}  |
| Paternal grandmother*T     |          | -0.253*  | -0.235*  |
|                            |          | {0.058}  | {0.088}  |
| Mothers sisters            |          | 0.031    |          |
|                            |          | {0.394}  |          |
| Mothers sisters*T          |          | -0.056   |          |
|                            |          | {0.296}  |          |
| Fathers sisters            |          | 0.002    |          |
|                            |          | {0.995}  |          |
| Fathers sisters*T          |          | 0.042    |          |
|                            |          | {0.595}  |          |
| Mothers brothers           |          | -0.001   |          |
|                            |          | {0.949}  |          |
| Mothers brothers*T         |          | 0.024    |          |
|                            |          | {0.715}  |          |
| Fathers brothers           |          | 0.016    |          |
|                            |          | {0.689}  |          |
| Fathers brothers*T         |          | -0.034   |          |
|                            |          | {0.611}  |          |
| Total siblings of mother   |          |          | 0.016    |
|                            |          |          | {0.507}  |
| Total siblings of mother*T |          |          | -0.019   |
|                            |          |          | {0.470}  |
| Total siblings of father   |          |          | 0.01     |
|                            |          |          | {0.675}  |
| Total siblings of father*T |          |          | 0.001    |
|                            |          |          | {0.989}  |
| N                          | 2017     | 2017     | 2017     |

**Table notes:**

OLS regressions with height for age (HAZ) scores as dependent variable. P-values calculated using the wild cluster bootstrap-t procedure outlined in Cameron et al. (2008) are reported in curly brackets calculated.

All regressions include the following controls:

- Cluster level controls: Education and Chewa ethnicity in 2004
- Household level controls: A wealth index calculated in 2004.
- Mother level controls: Whether she had completed primary school, was working as a farmer or was a student in 2004, current age, age<sup>2</sup> and logarithmic height.
- Child level controls: Month of measurement, age, age<sup>2</sup>, gender, number of older siblings, number of older siblings<sup>2</sup>.

Sample includes all children born after the intervention start date in July 2005 to married main respondent mothers, who were aged 0-53 months at the time of measurement. Column 1 indicates the effect of intervention assignment on HAZ scores, estimated over the sample where family networks information is not missing. Columns 2-6 indicate how intervention effects on HAZ scores vary with the presence of different extended family members.

\*= p<0.1, \*\*=p<0.05, \*\*\*=p<0.01

## Appendix 1

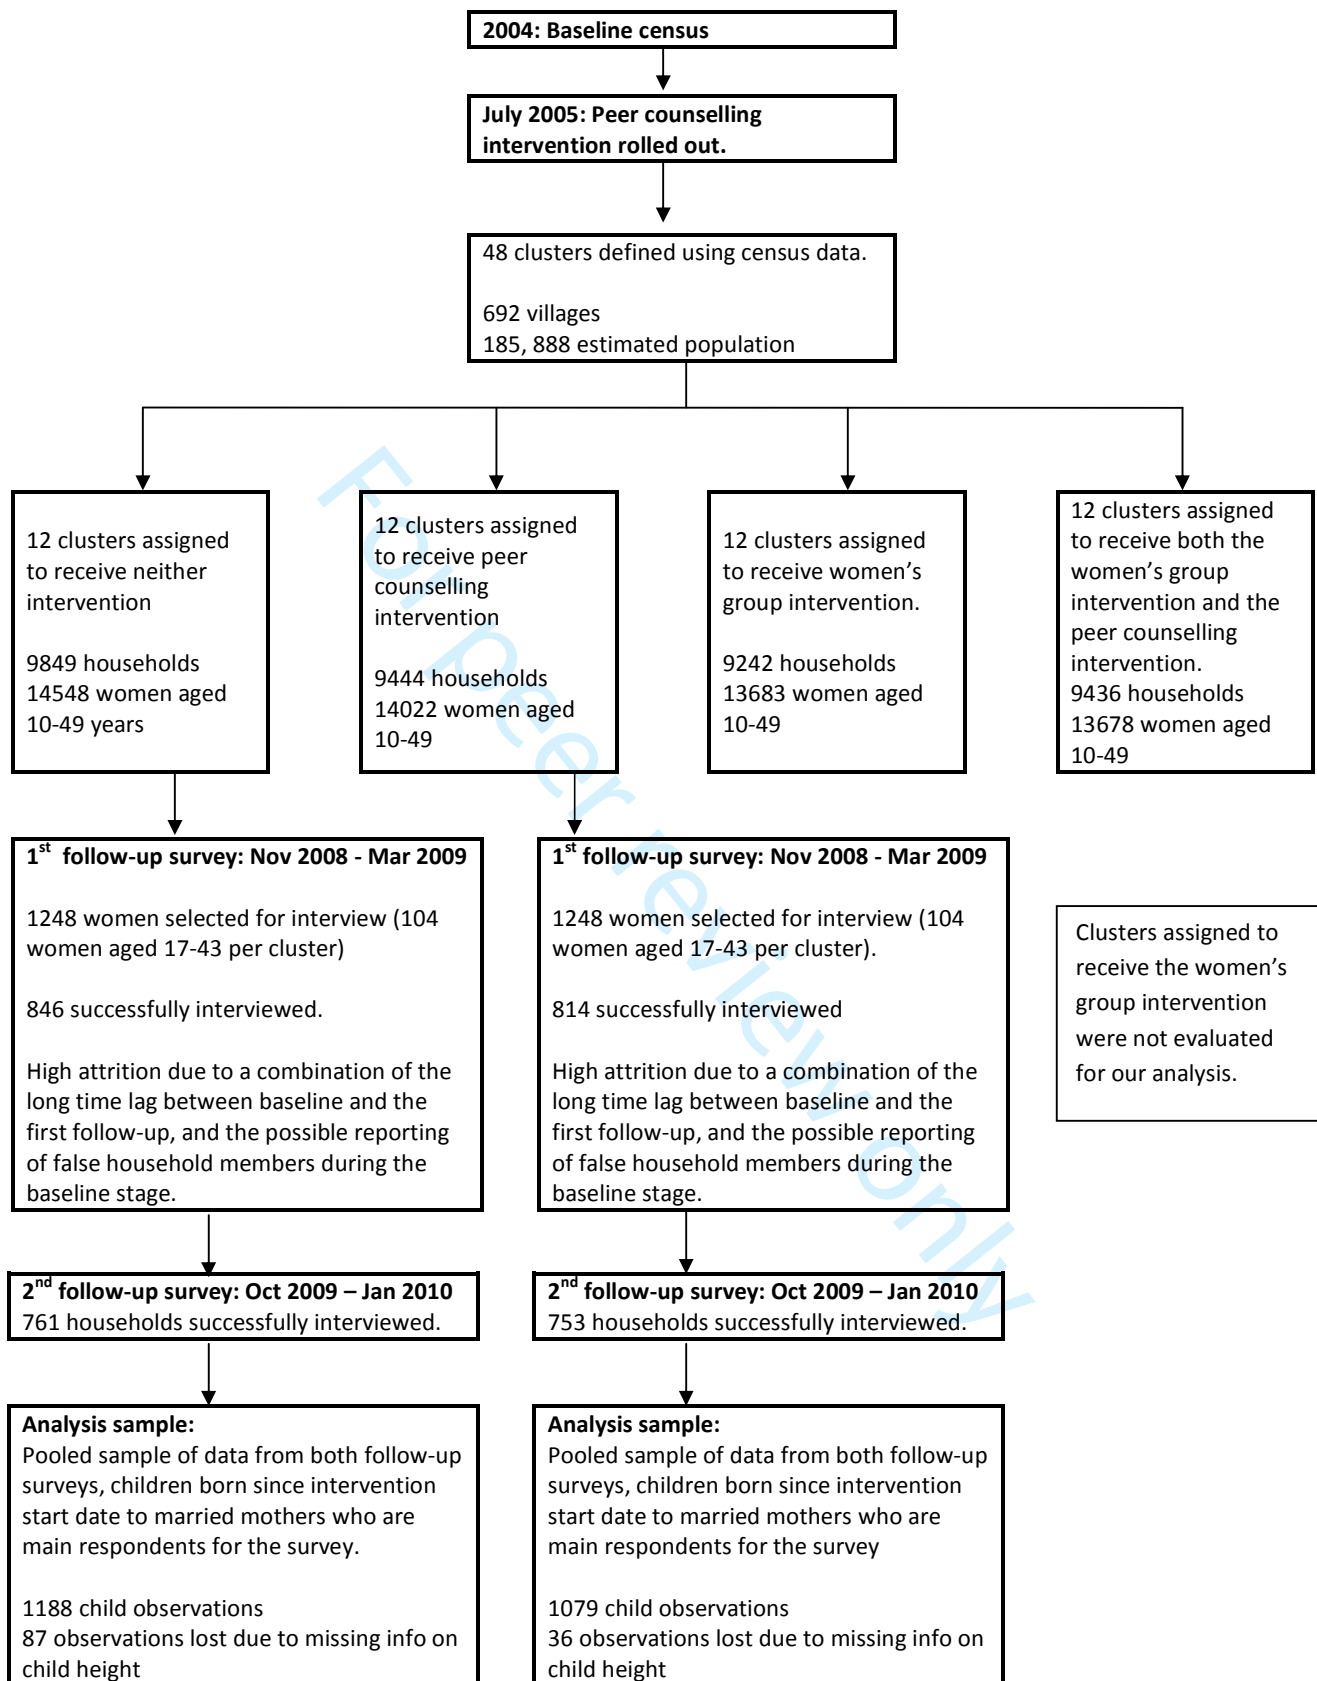

STROBE Statement—Checklist of items that should be included in reports of *case-control studies*

|                              | Item No | Recommendation                                                                                                                                                                                    | Complete?         |
|------------------------------|---------|---------------------------------------------------------------------------------------------------------------------------------------------------------------------------------------------------|-------------------|
| <b>Title and abstract</b>    | 1       | (a) Indicate the study's design with a commonly used term in the title or the abstract                                                                                                            | ✓                 |
|                              |         | (b) Provide in the abstract an informative and balanced summary of what was done and what was found                                                                                               | ✓ (pg 2)          |
| <b>Introduction</b>          |         |                                                                                                                                                                                                   |                   |
| Background/rationale         | 2       | Explain the scientific background and rationale for the investigation being reported                                                                                                              | ✓ (pg 4)          |
| Objectives                   | 3       | State specific objectives, including any prespecified hypotheses                                                                                                                                  | ✓ (pg 5)          |
| <b>Methods</b>               |         |                                                                                                                                                                                                   |                   |
| Study design                 | 4       | Present key elements of study design early in the paper                                                                                                                                           | ✓ (pg 5, 7,       |
| Setting                      | 5       | Describe the setting, locations, and relevant dates, including periods of recruitment, exposure, follow-up, and data collection                                                                   | ✓ (pg 5 – 7, 10)  |
| Participants                 | 6       | (a) Give the eligibility criteria, and the sources and methods of case ascertainment and control selection. Give the rationale for the choice of cases and controls                               | ✓ (pg 7-9)        |
|                              |         | (b) For matched studies, give matching criteria and the number of controls per case                                                                                                               |                   |
| Variables                    | 7       | Clearly define all outcomes, exposures, predictors, potential confounders, and effect modifiers. Give diagnostic criteria, if applicable                                                          | ✓ (pg 8-9)        |
| Data sources/<br>measurement | 8*      | For each variable of interest, give sources of data and details of methods of assessment (measurement). Describe comparability of assessment methods if there is more than one group              | ✓ (pg 7)          |
| Bias                         | 9       | Describe any efforts to address potential sources of bias                                                                                                                                         | ✓ (pg 9)          |
| Study size                   | 10      | Explain how the study size was arrived at                                                                                                                                                         |                   |
| Quantitative variables       | 11      | Explain how quantitative variables were handled in the analyses. If applicable, describe which groupings were chosen and why                                                                      | ✓ (pg 8-9)        |
| Statistical methods          | 12      | (a) Describe all statistical methods, including those used to control for confounding                                                                                                             | ✓ (pg 8 -9)       |
|                              |         | (b) Describe any methods used to examine subgroups and interactions                                                                                                                               | ✓ (pg 8-9)        |
|                              |         | (c) Explain how missing data were addressed                                                                                                                                                       | ✓ (pg 9)          |
|                              |         | (d) If applicable, explain how matching of cases and controls was addressed                                                                                                                       |                   |
|                              |         | (e) Describe any sensitivity analyses                                                                                                                                                             | ✓ (pg 8-9)        |
| <b>Results</b>               |         |                                                                                                                                                                                                   |                   |
| Participants                 | 13*     | (a) Report numbers of individuals at each stage of study—eg numbers potentially eligible, examined for eligibility, confirmed eligible, included in the study, completing follow-up, and analysed | ✓<br>(Appendix 1) |
|                              |         | (b) Give reasons for non-participation at each stage                                                                                                                                              | ✓<br>(Appendix 1) |
|                              |         | (c) Consider use of a flow diagram                                                                                                                                                                | ✓<br>(Appendix 1) |
| Descriptive data             | 14*     | (a) Give characteristics of study participants (eg demographic, clinical,                                                                                                                         | ✓ (Table 1)       |

|                          |     |                                                                                                                                                                                                              |                   |
|--------------------------|-----|--------------------------------------------------------------------------------------------------------------------------------------------------------------------------------------------------------------|-------------------|
|                          |     | social) and information on exposures and potential confounders                                                                                                                                               |                   |
|                          |     | (b) Indicate number of participants with missing data for each variable of interest                                                                                                                          | ✓<br>(Appendix 1) |
| Outcome data             | 15* | Report numbers in each exposure category, or summary measures of exposure                                                                                                                                    | ✓ (Table 1)       |
| Main results             | 16  | (a) Give unadjusted estimates and, if applicable, confounder-adjusted estimates and their precision (eg, 95% confidence interval). Make clear which confounders were adjusted for and why they were included | ✓ (Table 4)       |
|                          |     | (b) Report category boundaries when continuous variables were categorized                                                                                                                                    | ✓                 |
|                          |     | (c) If relevant, consider translating estimates of relative risk into absolute risk for a meaningful time period                                                                                             |                   |
| Other analyses           | 17  | Report other analyses done—eg analyses of subgroups and interactions, and sensitivity analyses                                                                                                               | ✓ (Table 4)       |
| <b>Discussion</b>        |     |                                                                                                                                                                                                              |                   |
| Key results              | 18  | Summarise key results with reference to study objectives                                                                                                                                                     | ✓ (pg 11 - 13)    |
| Limitations              | 19  | Discuss limitations of the study, taking into account sources of potential bias or imprecision. Discuss both direction and magnitude of any potential bias                                                   | ✓ (pg 16)         |
| Interpretation           | 20  | Give a cautious overall interpretation of results considering objectives, limitations, multiplicity of analyses, results from similar studies, and other relevant evidence                                   | ✓ (pg 14 - 17)    |
| Generalisability         | 21  | Discuss the generalisability (external validity) of the study results                                                                                                                                        | ✓ (pg 15-17)      |
| <b>Other information</b> |     |                                                                                                                                                                                                              |                   |
| Funding                  | 22  | Give the source of funding and the role of the funders for the present study and, if applicable, for the original study on which the present article is based                                                | ✓ (pg 18)         |

\*Give information separately for cases and controls.

**Note:** An Explanation and Elaboration article discusses each checklist item and gives methodological background and published examples of transparent reporting. The STROBE checklist is best used in conjunction with this article (freely available on the Web sites of PLoS Medicine at <http://www.plosmedicine.org/>, Annals of Internal Medicine at <http://www.annals.org/>, and Epidemiology at <http://www.epidem.com/>). Information on the STROBE Initiative is available at <http://www.strobe-statement.org>.

# BMJ Open

## Family networks and infant health promotion: a mixed-methods evaluation from a cluster randomised controlled trial in rural Malawi

|                                 |                                                                                                                                                                                                                                                                                                                                                                                                                                                                                         |
|---------------------------------|-----------------------------------------------------------------------------------------------------------------------------------------------------------------------------------------------------------------------------------------------------------------------------------------------------------------------------------------------------------------------------------------------------------------------------------------------------------------------------------------|
| Journal:                        | <i>BMJ Open</i>                                                                                                                                                                                                                                                                                                                                                                                                                                                                         |
| Manuscript ID                   | bmjopen-2017-019380.R1                                                                                                                                                                                                                                                                                                                                                                                                                                                                  |
| Article Type:                   | Research                                                                                                                                                                                                                                                                                                                                                                                                                                                                                |
| Date Submitted by the Author:   | 26-Jan-2018                                                                                                                                                                                                                                                                                                                                                                                                                                                                             |
| Complete List of Authors:       | Scott, Molly; Oxford Policy Management<br>Malde, Bansi; University of Kent, School of Economics; Insitute for Fiscal Studies, Centre for Evaluation of Development Policies<br>King, C.; UCL, Institute for Global Health<br>Phiri, Tambosi; MaiMwana Project,<br>Chapota, Hilda; MaiMwana Project,<br>Kainja, Esther; MaiMwana Project,<br>Banda, Florida; MaiMwana Project<br>Vera-Hernandez, Marcos; UCL; Insitute for Fiscal Studies, Centre for Evaluation of Development Policies |
| <b>Primary Subject Heading</b>: | Global health                                                                                                                                                                                                                                                                                                                                                                                                                                                                           |
| Secondary Subject Heading:      | Health policy                                                                                                                                                                                                                                                                                                                                                                                                                                                                           |
| Keywords:                       | Nutrition < TROPICAL MEDICINE, Extended Family, Health promotion, Sub-Saharan Africa, Child Health                                                                                                                                                                                                                                                                                                                                                                                      |
|                                 |                                                                                                                                                                                                                                                                                                                                                                                                                                                                                         |

SCHOLARONE™  
Manuscripts

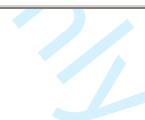



1  
2  
3 **Family networks and infant health promotion: a mixed-methods evaluation from a**  
4 **cluster randomised controlled trial in rural Malawi**  
5  
6

7 **Authors:**  
8

9 Molly Scott<sup>1</sup>, Bansi Malde<sup>3,6\*</sup>, Carina King<sup>4</sup>, Tambosi Phiri<sup>5</sup>, Hilda Chapota<sup>5</sup>, Esther Kainja<sup>5</sup>, Florida  
10 Banda<sup>5</sup>, Marcos Vera-Hernandez<sup>2,3</sup>  
11  
12

13 **Affiliations:**  
14

- 15 1. Oxford Policy Management  
16 2. Department of Economics, University College London, UK  
17 3. Centre for Evaluation of Development Policies, Institute for Fiscal Studies, London, UK  
18 4. Institute for Global Health, University College London, UK  
19 5. MaiMwana Project, Mchinji, Malawi  
20 6. School of Economics, University of Kent, UK  
21  
22

23 **\*Corresponding author:**  
24

25 School of Economics, University of Kent, Canterbury, Kent CT2 7NZ, UK. E-mail:  
26 [b.k.malde@kent.ac.uk](mailto:b.k.malde@kent.ac.uk); Telephone: (+44)(0)1227816464  
27  
28  
29

30 **Keywords:** Extended Family; Child Health; Sub-Saharan Africa; Health Promotion; Child Nutrition  
31  
32  
33  
34  
35  
36  
37  
38  
39  
40  
41  
42  
43  
44  
45  
46  
47  
48  
49  
50  
51  
52  
53  
54  
55  
56  
57  
58  
59  
60

**Abstract:**

**Objective:** Parents may rely on information provided by extended family members when making decisions concerning the health of their children. We evaluate whether extended family members affected the success of an information intervention promoting infant health.

**Methods:** This is a secondary, sequential mixed-methods study based on a cluster randomised controlled trial of a peer home-education intervention conducted in Mchinji District, Malawi. We used linear multivariate regression to test whether the intervention impact on child height-for-age z-scores (HAZ) was influenced by extended family members. 12 of 24 clusters were assigned to the intervention, in which all pregnant women and new mothers were eligible to receive 5 home visits from a trained peer counsellor to discuss infant care and nutrition. We conducted focus group discussions with mothers, grandmothers and peer counsellors, and key-informant interviews with husbands, chiefs and community health workers to better understand the roles of extended family members in infant feeding.

**Results:** Exposure to the intervention increased child HAZ scores by 0.296 standard deviations (SD) (95% CI: 0.116, 0.484). However, this effect is smaller in the presence of paternal grandmothers. Compared to an effect size of 0.441 – 0.467 SD (95% CI: -0.344, 1.050) if neither grandmother is alive, the effect size was 0.235 (95% CI: -0.493, 0.039) to 0.253 (95% CI: -0.529, 0.029) SD lower if the paternal grandmother was alive. There was no evidence of an effect of parents' siblings. Maternal grandmothers did not affect intervention impact, but were associated with a lower HAZ score independent of the intervention. Qualitative analysis suggested that grandmothers, who act as secondary caregivers and provide resources for infants, were slower to dismiss traditionally held practices and adopt intervention messages.

**Conclusion:** The results indicate that the intervention impacts are diminished by paternal grandmothers. Intervention success could be increased by integrating senior women.

**Strengths and Limitations:**

- Uses mixed methods to understand how extended family members affected the success of an infant feeding promotion program in Malawi
- Quantitative analysis, using linear multivariate regression, allows estimation of the size of effect different extended family members – including paternal and maternal grandmothers – have on the impact of the intervention
- Focus group discussions and key informant interviews help shed light on the mechanisms through which extended family members might have affected the intervention's success
- The interval between qualitative and quantitative data collection is a limitation, with potential changes to infant feeding practices over time and recall bias.
- Interventions on infant feeding would benefit from understanding and addressing extended family dynamics to improve reach and impact

## **Introduction**

Child health outcomes are influenced by individuals besides the mother and father, with a rich literature devoted to the contribution of extended family members [1], [2], [3], [4], [5]. In low-income settings, where risk of poor health is high and social welfare nets are minimal, the support of the extended family may be crucial in child-rearing [6]. Relatives can assist by acting as secondary caregivers [7], supplying labour, donating money and providing other in-kind resources to the household [8], [9], [10], [11]. Older women in the family can also affect child outcomes by dispensing infant health and nutrition advice to new mothers [12], [4], [13], [14], [5]. Finally, relatives may exert pressure on mothers, impacting their infant nutrition and health practices [15].

Extended family members may influence the effectiveness of policies and interventions designed to improve child health in low-income settings. On the one hand, they may provide resources and support that complement the intervention making it more effective. On the other hand, they could be resistant to change and reinforce traditional practices, thereby undermining interventions. The latter is particularly relevant in the case of health education and outreach programs, which are widespread across both developed and developing country settings.

Educational programs have the potential to improve child health outcomes by changing widespread misconceptions and traditional behaviours around child feeding and care in low-income settings. In Malawi, for instance, although most infants are breastfed for at least a year, only 40.5% of infants are still exclusively breastfed at 5 months [16]; while diets of children aged over 6 months usually lack sufficient diversity [17], [18]. Beliefs surrounding feeding practices for older infants include the view that the broth of soup is more nourishing than the vegetables or meat inside and that eggs are harmful for children aged 9 months.

1  
2  
3 Education campaigns promoting better infant feeding and care to care-givers of infants have  
4  
5 shown mixed success in developing country settings. In some cases, they have led to sustained  
6  
7 improvements in feeding practices [19], [14] and child physical growth [20], [21], [22]. In others,  
8  
9 they have had a negligible effect on child physical growth [23], [24], [25]. Given these mixed  
10  
11 findings, there is a need for greater understanding of the factors shaping responses to such  
12  
13 interventions across contexts.  
14  
15

16 Little attention has been paid to the role of extended family members in influencing the success  
17  
18 of care-giver focused education interventions in the existing literature, despite their important  
19  
20 role in shaping child health. Much of this existing literature is qualitative, with small samples [26],  
21  
22 [27]. The small number of quantitative evaluations of education interventions to improve infant  
23  
24 feeding that seek to involve extended family members find mixed evidence of effectiveness.  
25

26 Counselling sessions for new adolescent mothers and co-resident grandmothers reduced the un-  
27  
28 necessary intake of water and herbal teas within the first 6 months of the child's life in Brazil [28]  
29  
30 but failed to maintain breastfeeding of infants at age 2 years [29]; while a behavioural change  
31  
32 communication program delivered through older female leaders in Burkina Faso improved infant  
33  
34 feeding knowledge but failed to improve child health outcomes [14].  
35  
36

37  
38 A cluster randomised controlled trial (RCT) conducted in Malawi used a peer home-education  
39  
40 strategy to improve rates of exclusive breastfeeding, and reduce infant mortality (see Lewycka et  
41  
42 al. 2010, 2013 for further details [30], [31]). The trial achieved a 36% reduction in infant mortality  
43  
44 and an improvement in children's height-for-age z-score (HAZ) (increased by 0.271 standard  
45  
46 deviations;  $p=0.022$ ) [17] [31]. This paper uses mixed-methods to investigate whether members of  
47  
48 the extended family influenced the success of this peer home visiting intervention, and the  
49  
50 possible mechanisms through which their influence might work.  
51  
52  
53  
54  
55  
56  
57  
58  
59  
60

### **Methods:**

This is a secondary, sequential mixed-methods study based on a cluster RCT of a peer home-education intervention conducted in Mchinji District, Malawi. We investigate family member roles in the success of the intervention, which provided information on healthy infant feeding practices, with quantitative data collected between November 2008 and January 2010, and qualitative data collected in December 2015. Full details of the original trial and methods have previously been published [30] [31]. The quantitative data was collected and analysed first, and used to design the qualitative aspect of the study. The overall interpretation of our findings was integrated following analysis of the qualitative data.

### **Setting:**

Mchinji is a rural district in central Malawi with a population of about 455,000 [32]. Maternal and infant healthcare is delivered at one district hospital, four rural hospitals, nine health centres, private clinics, and in the community through government employed community health workers (CHW – known locally as Health Surveillance Assistants). Much of the healthcare received by pregnant women and infants is in the community setting by CHWs, or at home by kin and other social contacts. However, Malawi has medical pluralism, with traditional practices, beliefs and behaviours such as witchcraft and herbal medicine being commonly used alongside Western medicine. The 2010 Malawi Demographic and Health Survey reported 24% of births in the region occurred in the woman's own home and 2% in someone else's home, and many births are not attended by medically trained healthcare personnel but by traditional birth attendants (14.4%), friends and relatives (8.7%) or no one (2.6%) [16]. Without access to a skilled birth attendant, women are more vulnerable to infection and complications during birth; the infant mortality rate in 2010 was of 66 per 1000 live births [16].

1  
2  
3 Traditionally, the main ethnic group in the study area, the Chewa, are a matrilineal and matrilocal  
4 group. Matriliney is a system in which land is passed through the female line. Under traditional  
5 matrilineal norms, husbands move to their wives' homes after marriage unless they make a special  
6 payment. However, following the influence of patrilineal and patrilocal ethnic groups and British  
7 colonialists, there is evidence that matrilocality has waned over time, but not completely [33],  
8 [34]. As a result, women often remain in close proximity to their own relatives after marriage.  
9  
10  
11  
12  
13  
14

### 15 16 **Intervention Description**

17  
18  
19 For the RCT, Mchinji was divided into 48 approximately equal population clusters based on the  
20 1998 Malawi Population and Housing census (the most recent census at the time of trial  
21 planning). Within each cluster of around 8000 people, the 3000 individuals living in villages closest  
22 to the geographical centre were enumerated as the eligible study population. 12 clusters were  
23 assigned to the infant feeding intervention only and 12 served as controls. Full details of the trial  
24 set-up and methods are in Lewycka et al., 2010 [30]. All women living in clusters assigned to the  
25 infant feeding intervention who became pregnant during the trial period were eligible to receive  
26 five home visits from a trained local woman volunteer ('peer counsellor') to discuss maternal and  
27 infant healthcare issues; around 60% of eligible women reported having been visited. The visits  
28 were timed to coincide with key stages of infant development (the third trimester, and at one  
29 week, one month, three and five months after birth). Each visit focused on a specific set of topics  
30 for discussion, with special attention paid to nutrition practices including exclusive breastfeeding,  
31 and complementary feeding. Peer counsellors were literate local women aged 23-50 years with  
32 breastfeeding experience, who each covered a population of about 1000 people.  
33  
34  
35  
36  
37  
38  
39  
40  
41  
42  
43  
44  
45  
46  
47  
48

49 The intervention began in December 2004, with an initial establishment period until June 2005.

50 The trial was on-going at the time of the quantitative data collection. Following the end of the  
51 trial period, peer counsellors continued to receive mentorship and supervision support from  
52 government CHWs and the local implementing NGO. In 2015, at the time of qualitative data  
53  
54  
55  
56  
57

1  
2  
3 collection, approximately 1/3 of the volunteer counsellors were still active in delivering the  
4  
5 intervention.

## 6 7 8 **Quantitative Analysis:**

### 9 10 Data and Sample Selection:

11  
12 A baseline census was conducted in all clusters in 2004, prior to the start of the intervention. All  
13  
14 women aged between 10 and 49 were enumerated and a random sample of 104 women aged  
15  
16 between 17 and 43 per cluster was then drawn to be interviewed for two follow-up quantitative  
17  
18 surveys as part of this secondary study. Sampled women ('main respondent' hereon) were visited  
19  
20 to complete the first follow-up in November 2008-March 2009, and a second follow-up in October  
21  
22 2009 –January 2010.  
23  
24

25  
26 Each follow-up survey contained questions about the size of the extended family of the main  
27  
28 respondent and her husband (those alive and those in the village), the health of all household  
29  
30 members, food and liquid intake of children aged under 6 years, knowledge about child nutrition,  
31  
32 intervention participation (in treatment clusters), and socio-economic variables such as adult  
33  
34 work. The height of the main respondent and the height and weight of children under 6 years  
35  
36 were also collected by trained enumerators.  
37  
38

39  
40 The main outcome for our analysis is the child height-for-age z-score (HAZ score), which is a long-  
41  
42 term indicator of health that reflects nutrition and morbidity since birth, and should be sensitive  
43  
44 to any effects of intervention exposure in early life. It is calculated by comparing the height of the  
45  
46 child with the median height in the World Health Organization reference population of children of  
47  
48 the same gender and age in months [35].  
49  
50

51  
52 The sample was balanced between treatment and control clusters along a range of variables  
53  
54 collected at baseline (see Fitzsimons et al (2016), Table 1 [17]). The baseline characteristics of the  
55  
56  
57  
58  
59  
60



1  
2  
3 two groups remained similar even after accounting for attrition between the baseline and first  
4  
5  
6  
7  
8  
9  
10  
11  
12  
13  
14  
15  
16  
17  
18  
19  
20  
21  
22  
23  
24  
25  
26  
27  
28  
29  
30  
31  
32  
33  
34  
35  
36  
37  
38  
39  
40  
41  
42  
43  
44  
45  
46  
47  
48  
49  
50  
51  
52  
53  
54  
55  
56  
57  
58  
59  
60

two groups remained similar even after accounting for attrition between the baseline and first  
endline survey, indicating that randomisation was not jeopardised.

For this analysis we use a sample of children who were born since July 2005; and whose mothers  
are married main respondents in the follow-up surveys (80% of the sample). This sample selection  
ensures that we measure effects on children whose mothers were eligible to receive visits from a  
peer counsellor; and allows us to compare effects of the mothers' relatives with those of her  
husband. Children in the estimation sample were aged between 0 and 53 months at the time of  
the endline surveys. Appendix 1 provides a timeline of the original trial and the quantitative data  
collection, and of our sample inclusion criteria.

Table 1 presents the means of basic demographic and socio-economic characteristics for women  
in the analysis sample living in control clusters at baseline, the differences in the means between  
the control and treatment groups, and the p-value of this difference. The last two columns allow  
us to assess whether the randomisation holds in our selected sample. Women assigned to the  
control group were 24.6 years on average. 71.8% were married and while 70.1% had completed at  
least primary education, only 7.6% had completed secondary education. In line with the general  
profile of communities in Mchinji, 95.4% of sampled women were Chewa ethnicity and 98.3%  
were Christian. The average household size was 5.6 members and all households were engaged in  
agricultural activity.

Table 2 displays statistics on the size of extended family networks of the children in our analysis  
sample. Most children have their grandmothers alive (87.3% have maternal grandmothers alive  
and 80.7% have paternal grandmothers) and their parents have a relatively large number of  
siblings, with an average of more than two brothers and two sisters each.

### Model Specification and Estimation

The quantitative analysis aims to determine how different family members influence the effectiveness of the infant feeding intervention. Before estimating the main model, we study the relationship between baseline characteristics of mothers and their households and measures of the extended family using linear regression. Table 3 reports these results. It indicates that children whose grandmothers are alive have on average younger mothers, who are more likely to have completed at least primary education, less likely to be working as farmers in 2004, and are from more socioeconomically advantaged households, as measured by a composite wealth index constructed using principal components analysis as recommended by [36].

Our main specification is the following linear multivariate regression:

$$\begin{aligned}
 HAZ_{ij} = & \alpha + \beta T_j + \beta_2 \text{Maternal\_grandmother}_{ij} + \beta_3 \text{Maternal\_grandmother}_{ij} * T_j \\
 & + \beta_4 \text{Paternal\_grandmother}_{ij} + \beta_5 \text{Paternal\_grandmother}_{ij} * T_j \\
 & + \beta_6 \text{Total\_mothers\_siblings}_{ij} + \beta_7 \text{Total\_mothers\_siblings}_{ij} * T_j \\
 & + \beta_8 \text{Total\_fathers\_siblings}_{ij} + \beta_9 \text{Total\_fathers\_siblings}_{ij} * T_j + X_{ij} \gamma \\
 & + Z_j \gamma_2 + t + \epsilon_{ij}
 \end{aligned}$$

where  $HAZ_{ij}$  is the height-for-age z-score of child  $i$  in cluster  $j$ .  $T_j$  is a treatment exposure indicator which captures whether the child was born to a mother living in 2004 (pre-intervention) in a cluster that was assigned to receive the program. We therefore use an intent-to-treat estimator.  $\text{Maternal\_grandmother}_{ij}$  and  $\text{Paternal\_grandmother}_{ij}$  are binary variables indicating, respectively, whether the maternal and paternal grandmother is alive.  $\text{Total\_mothers\_siblings}_{ij}$  ( $\text{Total\_fathers\_siblings}_{ij}$ ) captures the total number of siblings of the child's mother (father) who are alive. We use two definitions of this variable in different specifications of the model: (i) Brothers and sisters (separately) of each parent, and (ii) the total siblings of each parent.  $X_{ij}$  and  $Z_j$  are vectors of control variables at the individual and cluster level respectively. These include all baseline characteristics where significant differences between households with different

1  
2  
3 extended family members alive were detected, and interview month and year indicators to  
4  
5 account for month-year-specific shocks. We do not adjust the data for missing information.  
6

7  
8 We fitted three models, one crude model with the intervention term only, and two full models as  
9  
10 specified in the equation each treating parent siblings differently.  
11

12  
13 The coefficient  $\beta$  captures the effect of the program for children whose maternal and paternal  
14  
15 grandmothers are dead, and whose parents are only children. The coefficients  $\beta_3, \beta_5, \beta_7$  and  $\beta_9$ ,  
16  
17 associated with interaction terms between variables capturing extended family relations and the  
18  
19 indicator for program allocation, estimate the additional effect of the program for children with  
20  
21 different types and numbers of extended family members. A positive (or negative) significant  
22  
23 interaction provides evidence that the intervention effect is enhanced (or diminished) in the  
24  
25 presence of that particular family member. Through the coefficients  $\beta_2, \beta_4, \beta_6$  and  $\beta_8$ , the  
26  
27 specification also accounts for the possibility that, independently of the intervention, the HAZ  
28  
29 score might be different depending on what family members are alive.  
30

31  
32 Errors  $\varepsilon_{ij}$  are assumed to be uncorrelated between individuals in different clusters but are allowed  
33  
34 an unrestricted correlation structure within clusters. To account for correlation within clusters,  
35  
36 standard errors must be adjusted to prevent downward bias, and incorrect inference. Given the  
37  
38 small number of clusters in the study (12 intervention and 12 control clusters), we adopt wild  
39  
40 cluster bootstrap methods as recommended in Cameron et al. (2008) [37]. Associated 95%  
41  
42 confidence intervals can be calculated using a computationally intensive method suggested in  
43  
44 [38]. The bootstrap adjustment applied here was studied in detail by Fitzsimons et al (2016) and  
45  
46 was found to perform well [17]. Data from both follow-up surveys is pooled to improve statistical  
47  
48 power.  
49  
50

51  
52 The extended family network is defined according to which members of the family are alive,  
53  
54 rather than which ones live in the same village or household. This is in case treatment exposure  
55  
56  
57

1  
2  
3 affected decisions over where to live, which would cause a measure of family network size based  
4  
5 on residence to be correlated with the intervention, and thereby bias estimates. The benefit of  
6  
7 defining the size of the family network according to which members are alive is that this is almost  
8  
9 certain to be invariant to program exposure.

10  
11  
12 We choose to define  $T_j$  by exposure to the intervention rather than actual participation since  
13  
14 participation in the program was voluntary and also relied on the ability of peer counsellors to  
15  
16 locate eligible women. Women who peer counsellors did not manage to trace or who chose not  
17  
18 to take part in the program may be different from those who did participate. The existence of  
19  
20 such systematic differences would potentially introduce some unobserved correlation between  
21  
22 the treatment interaction variables and HAZ scores if  $T_j$  were defined on the basis of actual  
23  
24 participation. Indeed, Fitzsimons et al. (2016) report that women who received the visits tend to  
25  
26 be poorer [17]. Defining treatment based on residence at baseline rather than at the time of the  
27  
28 follow-up interviews also alleviates concerns of bias in case there was purposeful migration into  
29  
30 treated areas by control-group assigned households.

### 31 32 33 **Qualitative Analysis**

34  
35  
36 Following the findings from the quantitative analysis, we conducted focus group discussions  
37  
38 (FGDs) with grandmothers, mothers and peer counsellors, and semi-structured interviews with  
39  
40 fathers, CHWs and village chiefs to gain a more in-depth understanding of family roles and how  
41  
42 grandmothers might influence child health.

### 43 44 45 **Recruitment**

46  
47  
48 Participants were recruited from 11 of 24 intervention and control clusters across the district in  
49  
50 late 2015. Mothers, grandmothers and fathers were purposively selected by CHWs and chiefs to  
51  
52 represent those households who had actively received the intervention or had children under-5  
53  
54 years in control clusters. Volunteer peer counsellors were contacted directly, to represent a range  
55  
56  
57

1  
2  
3 of ages and years' experience as counsellors. Chiefs and CHWs were purposively selected and  
4  
5 contacted directly to represent clusters with a range of engagement with the intervention. We  
6  
7 planned to conduct a total of five FGDs and 10 interviews, rather than collecting data until  
8  
9 saturation was reached.  
10

### 11 Data Collection:

12  
13  
14 FGDs and interviews used topic guides, based on the quantitative findings and wider literature on  
15  
16 infant feeding behaviours, covering: household decision making around feeding, infant feeding  
17  
18 practices, feeding knowledge and sources of information about infant feeding. We asked about all  
19  
20 household members, and specifically probed about the role of grandmothers. All discussions were  
21  
22 facilitated by two local trained qualitative researchers in Chichewa. Participants were reimbursed  
23  
24 for their travel expenses and given refreshments. All discussions were audio recorded, and then  
25  
26 verbatim transcribed in Chichewa. Transcripts were translated into English as a group, with  
27  
28 ambiguous terms or phrases debated until a consensus meaning was reached. Data collection,  
29  
30 transcription and translation were conducted by EK, HC, TP and FM – female Malawian  
31  
32 researchers who are fluent in English.  
33  
34  
35

### 36 Analysis

37  
38  
39 The English transcripts were coded using an inductive framework approach based on the  
40  
41 following steps: familiarisation, coding, developing and applying the framework, charting and  
42  
43 interpretation [39]. All transcripts were double-coded, as a group by TP, EK, HC and FB and  
44  
45 independently by CK – a female British researcher with five years' work experience in Malawi.  
46  
47 Coding was done on paper and the coding matrix developed in Microsoft Excel. A round-table  
48  
49 discussion was then conducted by all five researchers to compare the codes and agree on themes;  
50  
51 disagreements in coding were discussed until an agreement on the interpretation was reached.  
52  
53  
54

### 55 Ethics

1  
2  
3 All participants gave informed written consent. Ethical approval to conduct this study was  
4  
5 obtained from the National Health Sciences Research Committee in Malawi [Protocol Numbers:  
6  
7 491; 15/9/1483].  
8  
9

## 10 **Results**

### 11 Quantitative Analysis:

12  
13 Table 4 displays the results of the quantitative analysis on child HAZ scores. Model 1 shows that  
14  
15 overall exposure to the program raised HAZ scores by 0.296 (95% CI: 0.116, 0.484) standard  
16  
17 deviations (SD). Models 2 and 3 present the results for the regressions that test whether different  
18  
19 family members influenced the effectiveness of the intervention on child HAZ scores. Model 2  
20  
21 presents the results where we allow for brothers and sisters of the child's parents to have  
22  
23 different effects, while Model 3 displays those including (separately) the total siblings of each of  
24  
25 the child's parents.  
26  
27  
28  
29

30  
31 For children whose parents have no living mothers or siblings, the effect of the intervention on  
32  
33 HAZ scores is between 0.441 (95% CI: -0.335, 1.028) and 0.467 (95% CI: -0.344, 1.050) SD.  
34

35 However, for those children with a living paternal grandmother, the intervention effect was  
36  
37 reduced by between 0.235 (95% CI: -0.493, 0.039) and 0.253 (95% CI: -0.529, 0.029) SD. The  
38  
39 results also suggest that, independently of whether they are treated by the intervention or not,  
40  
41 children whose maternal grandmothers are alive have lower HAZ scores. Finally, the results  
42  
43 uncover no association between the number of parents' siblings on HAZ scores, or of differential  
44  
45 effects of the intervention by these.  
46  
47  
48

### 49 Qualitative Analysis:

50  
51 We conducted 5 FGDs, with 37 participants of 48 invited (mothers=16; grandmothers=15; peer  
52  
53 counsellors=6), and 10 semi-structured interviews (village chiefs=4, fathers=4; CHW=2). We  
54  
55 defined the following emergent themes in relation to grandmothers and their role in infant  
56  
57  
58

1  
2  
3 feeding and growth: decision-making roles, knowledge and information, traditional practices and  
4  
5 intervention successes and challenges around behaviour change.  
6

7  
8 **Decision-Making Roles:** Across the respondents there was agreement that the father is responsible  
9  
10 for resource allocation and mobilisation, while the mother's role is to manage and prepare food for  
11  
12 the household. When there is a lack of food or resources, extended family members or neighbours  
13  
14 can provide assistance, for example "*maybe you have found you don't even have flour, our sister in*  
15  
16 *law or mother in law gives it to you saying that it's only for the child, prepare porridge so that it*  
17  
18 *should eat*" (Mother 5, Control). Within the household, grandmothers, both maternal and paternal,  
19  
20 were generally viewed as the secondary caregivers, providing support by cooking for and feeding  
21  
22 infants.  
23

24  
25 **Information and Knowledge:** Sources of information about infant feeding included: antenatal clinics  
26  
27 and other healthcare, family members, village chiefs and community meetings, the peer counsellor  
28  
29 intervention and other NGOs and civil society education programmes. Interestingly, the peer  
30  
31 counsellors were reported as a source of information by participants from control areas, likely  
32  
33 reflecting contamination following the end of the trial period. Although grandmothers report giving  
34  
35 similar advice as that given by healthcare workers:  
36  
37

38  
39 "*now we are afraid, so we provide the same advice they give at the clinic, so we tell them the same*  
40  
41 *things*" (Grandmother 7, Intervention),  
42

43  
44 However, reports from peer counselors cast doubt on this. They instead mentioned encountering  
45  
46 difficulties with grandmothers when disseminating their advice: "*frequently the grandmothers*  
47  
48 *mislead, mislead them as they say what they were doing before in their time*" (Peer Counselor 5).  
49

50  
51 Peer counselors, however, also noticed a change over time in attitudes among grandmothers, with  
52  
53 increased acceptance of the intervention messages: "*the group of relatives which gives the most*  
54  
55 *problems is the grandparents because they tell the woman that 'aaah [the counselors] are just*  
56  
57

1  
2  
3 *cheating you, they want this child to be crying' [...] but we have seen that the grandmothers now*  
4  
5 *have understood"* (Peer Counselor 4).  
6

7  
8 Despite extended family members not being the target group of the intervention, breastfeeding,  
9  
10 weaning and complementary feeding messages appear to have disseminated, with fathers ("*advice*  
11 *about breast feeding, I know a lot; when a child is born he should breast feed exclusively, very*  
12 *frequently"* – Father 1, Intervention) and grandmothers ("*so they say breastfeed frequently these*  
13 *days, that's the modern way of childbirth, so you also say breastfeed the child"* – Grandmother 2,  
14 Intervention) demonstrating accurate knowledge.  
15  
16  
17  
18  
19

20  
21 **Traditional Practices:** Several different traditional practices and beliefs about infant feeding were  
22 mentioned by all respondent types, including: adding medicinal herbs to infants' porridge; believing  
23 children become "foolish" is breastfed for too long; and smaller portions making children "smart".  
24  
25 However, mothers and grandmothers in both intervention and control areas commented that while  
26 these practices and beliefs are known to exist, they are no longer commonplace ("*most of this*  
27 *generation do not follow [these practices]"* – Mother 8, Control) or rituals and the giving of herbal  
28 medicines is done in hiding. This was confirmed by one of the CHW who commented that: "*while*  
29 *the grandmothers and the other people have their own beliefs, our role is to get rid of those beliefs*  
30 *[...] little by little people change"* (CHW 2, Intervention).  
31  
32  
33  
34  
35  
36  
37  
38  
39  
40

41 **Behaviour Change:** Community members reported sustained behaviour change relating to exclusive  
42 breastfeeding and facility-based deliveries: "*behaviour these days has changed in that delivering at*  
43 *home is no longer there [...] we say go to the hospital"* (Grandmother 5, Intervention). However,  
44  
45 CHW and peer counselors noted that these changes were not seen immediately, and that barriers  
46 such as lack of engagement, lack of understanding and cultural issues (e.g. urban women 'looking  
47 down' on the counselors) were present.  
48  
49  
50  
51  
52  
53

#### 54 **Discussion:**

55  
56  
57  
58  
59  
60



1  
2  
3 Our mixed-methods evaluation of the effect of extended family members on the impact of a peer-  
4 led home education intervention in rural Malawi suggests that living grandmothers can be a  
5 barrier to intervention dissemination and behaviour change. The qualitative findings complement  
6 the quantitative results, and suggest the mechanism through which grandmothers may influence  
7 the effectiveness of the peer intervention.  
8  
9  
10  
11  
12

13  
14 The apparently negative influence of paternal grandmothers on intervention success may be due  
15 to a conflict between their views on infant feeding from the recommendations of peer  
16 counsellors. The qualitative findings offer some support for this hypothesis by providing evidence  
17 that grandmothers are proponents of 'traditional' views of child feeding that differ from standard  
18 recommendations, supported by previous studies [4], [12]. They indicate that grandmothers  
19 persist in their traditional beliefs for longer, and as providers of both financial and childcare  
20 support, exert influence towards their own beliefs of child feeding rather than towards the  
21 information provided by the intervention. Reassuringly though, our data suggest that  
22 grandmothers eventually adjust their practices to be in line with the information provided by the  
23 intervention.  
24  
25  
26  
27  
28  
29  
30  
31  
32  
33  
34  
35

36 Interestingly, the qualitative data did not distinguish between paternal and maternal  
37 grandmothers, despite other evidence that, at least in Malawi, it is paternal grandmothers who  
38 command the most influence [12]. This may explain why we do not find a similar negative effect  
39 on intervention success associated with maternal grandmothers in the quantitative estimation.  
40  
41  
42  
43  
44 However, our ability to speculate on different mechanisms of action between maternal and  
45 paternal grandmothers is limited.  
46  
47  
48

49 The delays seen in attitude change amongst grandmothers suggest that there may be potential to  
50 increase the intervention's impact further by engaging extended family members in the  
51 information exchange process. A growing body of evidence underscores the benefits of more  
52 inclusive approaches to health education [40], [12], [13], [14], and cautions against assuming that  
53  
54  
55  
56  
57

1  
2  
3 new information will necessarily be incorporated into knowledge and behaviour. Actual response  
4 will, in general, depend on the mode of transmission. Approaches that treat users of information  
5 as passive are less likely to be effective than those that foster dialogue within the target  
6  
7 communities.  
8  
9

10  
11 In contexts where older women exert particular influence, there are clear grounds for designing  
12 interventions that respect and acknowledge their seniority. The rationale behind the work of  
13 organisations like the Grandmother Project is that elder women can act as powerful agents for  
14 change if they are mobilised and empowered to support intervention aims [4], [12]. We consider  
15 our findings to provide support for this agenda. However, it must be noted that involving senior  
16 women in interventions might not be sufficient to improve child health, particularly in contexts  
17 where poor nutrition is not the only cause for poor health. Evidence from the evaluation of an  
18 integrated agriculture and nutrition and health behaviour change communication programme  
19 indicates that senior women can be effective in changing knowledge, but this improved  
20 knowledge might still fail to yield improvements in child growth [14].  
21  
22  
23  
24  
25  
26  
27  
28  
29  
30  
31  
32

33  
34 We uncover a negative association of maternal grandmothers in the absence of the intervention.  
35 However, this cannot be taken as evidence of a causal effect, because of the presence of  
36 confounders such as a higher competition for resources in families with living maternal  
37 grandmothers in matrilineal societies [41].  
38  
39  
40  
41  
42

43 The qualitative findings also raise the importance of the role of men as key providers and resource  
44 mobilisers. Previous quantitative evidence Fitzsimons et al (2016) [17] supports the critical role of  
45 males in ensuring adoption of the information provided. Therefore, integrating these influential  
46 figures with the peer counsellor intervention may help improve uptake and reduce the time to  
47 intervention acceptance we currently observe.  
48  
49  
50  
51  
52  
53  
54  
55  
56  
57  
58  
59  
60

1  
2  
3 In this study there were several limitations. Firstly, it is impossible to ascertain whether the  
4  
5 estimated quantitative detrimental effect of grandmothers is due to their presence and not  
6  
7 because households in which the paternal grandmother is alive are different in some  
8  
9 characteristic that is omitted from the regression and that affects the effectiveness of the  
10  
11 intervention. The survey and qualitative data may be subject to social desirability bias, with  
12  
13 respondents providing answers which they think will please the researchers. As the qualitative  
14  
15 and quantitative data triangulated, and respondents were not aware of our hypothesis, we do not  
16  
17 feel this considerably biased our conclusions. Finally, the mixed data were collected sequentially  
18  
19 rather than concurrently, with the qualitative data collection conducted five years after the  
20  
21 quantitative survey. This may have resulted in recall bias in the qualitative data, and the culture  
22  
23 and behaviours around infant feeding may have shifted between the two study phases. This is  
24  
25 somewhat supported by the FGDs and interviews from control areas being exposed to the peer  
26  
27 counsellors and their messages, posing a challenge to integrating the results. However, as the  
28  
29 qualitative data was planned to provide a more in-depth understanding and triangulation of the  
30  
31 quantitative findings, rather than comment on causality, we do not feel this detracts from our  
32  
33 interpretation.  
34  
35

36  
37 We found that grandmothers play an important role in shaping responses to an information  
38  
39 campaign targeting infant health. In order to increase the impact of information campaigns, our  
40  
41 findings suggest that excluding influential older women, who act as both important sources of  
42  
43 advice and childcare support, can weaken intervention impact by exposing a divergence between  
44  
45 traditional views and new information. Inclusive health education approaches that respect the  
46  
47 need to tackle existing traditional beliefs and the roles that grandmothers play, may overcome  
48  
49 this friction and improve the effectiveness of the intervention.  
50  
51  
52  
53  
54  
55  
56  
57  
58  
59  
60

1  
2  
3 Acknowledgements: We thank Andrew Mganga, Nicholas Mbwana, Christopher Kamphinga, Sonia  
4 Lewycka, Mikey Rosato and Julia Behrman for advice and assistance with quantitative data  
5 collection. We also thank Ravi Somani for his assistance in coding the program to obtain the  
6 confidence intervals.

7  
8 Funding: Funding from the ESRC/DFID grant ES/J009253/1 is gratefully acknowledged.

9  
10 Conflict of interest: We declare that we have no conflicts of interest.

11  
12 Authors contributions: All authors provided final approval of the version to be published. Concept  
13 and design of quantitative analysis: MS, BM and MV; analysis and interpretation of quantitative  
14 findings: MS, MV and BM; drafting the article and revising it critically: MS, BM, CK and MV.  
15 Concept and design of the qualitative study: BM, MVH, CK and TP. Qualitative data collection and  
16 analysis: TP, HC, EK, FB. Qualitative analysis was independently checked and coded: CK. CK, TP, EK,  
17 HC and FB discussed and agreed the final interpretation.

18  
19  
20 Data sharing: The raw quantitative data is available for download from the UK Data Archive.  
21  
22  
23  
24  
25  
26  
27  
28  
29  
30  
31  
32  
33  
34  
35  
36  
37  
38  
39  
40  
41  
42  
43  
44  
45  
46  
47  
48  
49  
50  
51  
52  
53  
54  
55  
56  
57  
58  
59  
60

## References

- [1] D. LaFave and D. Thomas, "Extended Families and Child Well-being," *Journal of Development Economics*, vol. 126, no. C, pp. 52-65, 2017.
- [2] P. Sheppard and R. Sear, "Do grandparents compete with or support their grandchildren? In Guatemala, paternal grandmothers may compete, and maternal grandmothers may cooperate," *Royal Society Open Science*, vol. 3, no. 160069, 2016.
- [3] B. Strassman and W. Garrard, "Alternatives to the grandmother hypothesis: A meta-analysis of the association between grandparental and grandchild survival in patrilineal populations," *Human Nature*, vol. 22, no. 1, p. 201, 2011.
- [4] J. Aubel, I. Touré and M. Diagne, "Senegalese grandmothers promote improved maternal and child nutrition practices: the guardians of traditional are not averse to change.," *Social Science & Medicine*, 59(5), pp. 945-959, 2004.
- [5] M. Gupta, R. Aborigo, P. Adongo, S. Rominski, A. Hogdson, C. Engmann and C. Moyer, "Grandmothers as gatekeepers? The role of grandmothers in influencing health-seeking for mothers and newborns in rural Ghana," *Global Public Health*, vol. 10, no. 9, pp. 1078-1091, 2015.
- [6] S. B. Hrdy, *Mother nature: A history of mothers, infants, and natural selection.*, New York: Pantheon Books, 1999.
- [7] P. K. Ivey, "Cooperative Reproduction in Ituri Forest Hunter-Gatherers: Who Cares for Efe Infants? 1.," *Current Anthropology*, 41.5, pp. 856-866, 2000.
- [8] M. A. Gibson and R. Mace, "Helpful Grandmothers in rural Ethiopia: A study of the effect of kin on child survival and growth," *Evolution and Human Behaviour* 26(6), pp. 469-482, 2005.
- [9] R. Lee and K. Kramer, "Children's Economic Roles in the Maya Family Life Cycle: Cain, Caldwell, & Chayanov Revisited," *Population and Development Review*, Vol. 28, No. 3, pp. 475-499, 2002.
- [10] M. Angelucci, G. De Giorgi, M. Rangel and I. Rasul, "Family networks and school enrolment: Evidence from a randomised social experiment.," *Journal of Public Economics*, 94(3), pp. 197-221, 2010.
- [11] E. Duflo, "Grandmothers and Granddaughters: Old-Age Pensions and Intrahousehold Allocation in South Africa," *World Bank Economic Review*, vol. 17, no. 1, pp. 1-25, 2003.
- [12] R. Bezner-Kerr, L. Dakishoni, L. Shumba, R. Msachi and M. Chirwa, ""We grandmothers know plenty": breastfeeding, complementary feeding and the multifaceted role of grandmothers in Malawi.," *Social Science & Medicine*, 66(5), pp. 1095-1105, 2008.

- 1  
2  
3 [13] J. Aubel and D. Sihalathavong, "Participatory communication to strengthen to role of  
4 grandmothers in child health: an alternative paradigm for health education and health  
5 communication.," *Journal of International Communication*, 7(2), pp. 76-97, 2001.  
6  
7  
8 [14] D. K. Olney, A. Pedehombga, M. T. Ruel and A. Dillon, "A 2-Year Integrated Agriculture and  
9 Nutrition and Health Behavior Change Communication Program Targeted to Women in Burkina  
10 Faso Reduces Anemia, Wasting and Diarrhea in Children 3-12.9 Months of Age at Baseline: A  
11 Cluster-Randomized Controlled Trial," *The Journal of Nutrition*, vol. 145, no. 6, pp. 1317 - 1324,  
12 2015.  
13  
14 [15] O. Agunbiade and O. Ogunleye, "Constraints to exclusive breastfeeding practice among  
15 breastfeeding mothers in Southwest Nigeria: implications for scaling up," *International*  
16 *Breastfeeding Journal*, vol. 7, no. 1, p. 5, 2012.  
17  
18 [16] National Statistical Office, Malawi, Macro ORC, "Malawi Demographic and Health Survey,"  
19 Zomba: Malawi National Statistical Office, Macro ORC, 2004.  
20  
21 [17] E. Fitzsimons, B. Malde, A. Mesnard and M. Vera-Hernandez, "Nutrition, Information, and  
22 Household Behaviour: Experimental Evidence from Malawi," *Journal of Development*  
23 *Economics*, vol. 122, pp. 113-126, 2016.  
24  
25 [18] B. F. Kalanda, F. H. Verhoeff and B. J. Brabin, "Breast and complementary feeding practices in  
26 relation to morbidity and growth in Malawian infants.," *European journal of clinical nutrition*,  
27 60(3), pp. 401-407, 2006.  
28  
29 [19] A. L. Morrow, M. L. Guerrero, J. Shults, J. Calva, C. Lutter, J. Bravo, G. Ruiz-Palacios, R. Morrow  
30 and F. Butterfoss, "Efficacy of home-based peer counselling to promote exclusive breastfeeding:  
31 a randomised controlled trial.," *The Lancet*, 353(9160), pp. 1226-1231, 1999.  
32  
33 [20] G. Guldan, H. M. X. Fan, Z. Ni, X. Xiang and M. Tang, "Culturally appropriate nutrition education  
34 improves infant feeding and growth in rural Sichuan, China," *Journal of Nutrition*, vol. 130, no. 5,  
35 pp. 1204-11, 2000.  
36  
37 [21] N. Bhandari, S. Mazumder, R. Bahl, J. Martines, R. Black, M. Bhan and I. F. S. Group, "An  
38 educational intervention to promote appropriate complementary feeding practices and physical  
39 growth in infants and young children in rural Haryana, India," *Journal of Nutrition*, vol. 134, no.  
40 9, pp. 2342-8, 2004.  
41  
42 [22] M. Penny, H. Creed-Kanashiro, R. Robert, M. Narro, L. Caulfield and R. Black, "Effectiveness of  
43 an educational intervention delivered through the health services to improve nutrition in young  
44 children: a cluster-randomised controlled trial," *The Lancet*, vol. 365, no. 9474, pp. 1863-72,  
45 2005.  
46  
47 [23] I. Engebretsen, D. Jackson, L. Fadnes, V. Nankabirwa, A. Diallo, T. Doherty, C. Lombard, S.  
48 Swanvelder, J. Nankunda, V. Ramokolo, D. Sanders, H. Wamani, N. Meda, J. Tumwine, E.  
49 Ekstrom, P. Van de Perre, C. Kankasa, H. Sommerfelt and T. Tylleskar, "Growth effects of  
50  
51  
52  
53  
54  
55  
56  
57  
58  
59  
60

- 1  
2  
3 exclusive breastfeeding promotion by peer counsellors in sub-Saharan Africa: the cluster-  
4 randomised PROMISE EBF trial," *BMC Public Health*, vol. 14, no. 1, p. 633, 2014.  
5  
6 [24] N. Bhandari, R. Bahl, B. Nayyar, P. Khokhar, J. Rohde and M. Bhan, "Food supplementation with  
7 encouragement to feed it to infants from 4 to 12 months of age has a small impact on weight  
8 gain," *Journal of Nutrition*, vol. 131, no. 7, pp. 1946-51, 2001.  
9  
10 [25] A. Guyon, V. Quinn, Z. Rambeloson and M. Hainsworth, "Using the Essential Nutrition Actions  
11 Approach to Improve the Nutritional Practices of Women and Children at Scale in Antananarivo  
12 and Fianarantsoa Provinces of Madagascar: Results and Trends 2000 to 2005," USAID, 2006.  
13  
14 [26] A. Mukuria, S. Martin, T. Egondi, A. Bingham and F. Thuita, "Role of social support in improving  
15 infant feeding practices in Western Kenya: A Quasi-Experimental Study," *Global Health, Science  
16 and Practice*, vol. 4, no. 1, pp. 55-72, 2016.  
17  
18 [27] A. DeLorme, E. Gavenus, C. Salmen, G. Benard, B. Mattah, E. Bukusi and K. Fiorella, "Nourishing  
19 networks: A socio-ecological analysis of a network intervention for improving household  
20 nutrition in Western Kenya," *Social Science and Medicine*, vol. 197, pp. 95-103, 2018.  
21  
22 [28] L. Nunes, E. Giugliani, L. Santo and L. de Oliveira, "Reduction of unnecessary intake of water and  
23 herbal teas on breast-fed infants: a randomized clinical trial with adolescent mothers and  
24 grandmothers," *Journal of adolescent health*, vol. 49, no. 3, pp. 258-64, 2011.  
25  
26 [29] C. da Silva, L. Nunes, R. Schwartz and E. Giugliani, "Effect of a pro-breastfeeding intervention on  
27 the maintenance of breastfeeding for 2 years or more: randomized clinical trial with adolescent  
28 mothers and grandmothers," *BMC Pregnancy and Childbirth*, vol. 16, no. 3, p. 97, 2016.  
29  
30 [30] S. Lewycka, C. Mwansambo, P. Kazembe, T. Phiri, A. Mganga, M. Rosato, H. Chapota, F.  
31 Malamba, S. Vergnano, M. Newell, D. Orsin and A. Costello, "A cluster randomised controlled  
32 trial of the community effectiveness of two interventions in rural Malawi to improve health care  
33 and to reduce maternal, newborn and infant mortality," *Trials*, 11(1), 88, 2010.  
34  
35 [31] S. Lewycka, C. Mwansambo, M. Rosato, P. Kazembe, T. Phiri, A. Mganga, H. Chapota, F.  
36 Malamba, E. Kainja, M. Newell, G. Greco, A. Pulkki-Brännström, J. Skordis-Worrall, S. Vergnano,  
37 D. Osrin and A. Costello, "Effect of women's groups and volunteer peer counselling on rates of  
38 mortality, morbidity, and health behaviours in mothers and children in rural Malawi  
39 (MaiMwana): a factorial, cluster-randomised controlled trial.," *The Lancet*, 381(9879), pp. 1721-  
40 1735, 2013.  
41  
42 [32] National Statistical Office, Malawi, "National Population and Housing Census: Analytical  
43 Report," 1998.  
44  
45 [33] G. Reniers and R. Tfamily, "Polygyny and HIV in Malawi.," *Demographic Research*, 19(53), p. 1811,  
46 2008.  
47  
48 [34] T. Takane, "Tobacco and smallholders in Malawi: village case studies in the Mchinji and  
49  
50  
51  
52  
53  
54  
55  
56  
57  
58  
59  
60

- 1  
2  
3           Mangochi Districts.," *African Research Series*, 93-119., 2005.  
4  
5 [35] WHO Anthro for personal computers, version 3.2.2, *Software for assessing growth and*  
6           *development of the world's children.*, Geneva: WHO, 2011.  
7  
8 [36] D. Filmer and L. Pritchett, "Estimating wealth effects without expenditure data - or tears: An  
9           application to educational enrollments in states of India," *Demography*, vol. 38, no. 1, pp. 115-  
10           132, 2001.  
11  
12 [37] A. C. Cameron, J. B. Gelbach and D. L. Miller, "Bootstrap-based improvements for inference with  
13           clustered errors.," *The Review of Economics and Statistics*, 90(3), pp. 414-427, 2008.  
14  
15 [38] A. Cameron and D. Miller, "A Practitioner's Guide to Cluster-Robust Inference," *Journal of*  
16           *Human Resources*, vol. 50, no. 2, pp. 317-372, 2015.  
17  
18 [39] N. K. Gale, G. Heath, E. Cameron, S. Rashid and S. Redwood, "Using the Framework Method for  
19           the Analysis of Qualitative Data in Multi-Disciplinary Health Research," *BMC Medical Research*  
20           *Methodology*, vol. 13:117, 2013.  
21  
22 [40] R. G. Lee and T. Garvin, "Moving from information transfer to information exchange in health  
23           and health care.," *Social science & medicine*, 56(3), pp. 449-464, 2003.  
24  
25 [41] R. Sear, "Kin and child survival in rural Malawi," *Human Nature*, 19(3), pp. 277-293, 2008.  
26  
27  
28  
29  
30  
31  
32  
33  
34  
35  
36  
37  
38  
39  
40  
41  
42  
43  
44  
45  
46  
47  
48  
49  
50  
51  
52  
53  
54  
55  
56  
57  
58  
59  
60



## Tables

**TABLE 1: Distribution of household and women characteristics in controls and differences with treatment group**

|                                                         | Analysis sample                          |                                       |         |
|---------------------------------------------------------|------------------------------------------|---------------------------------------|---------|
|                                                         | Control group<br>(Mean or<br>proportion) | Difference:<br>treatment -<br>control | p value |
| <b>Household characteristics</b>                        |                                          |                                       |         |
| Number of members <sup>a</sup>                          | 5.621                                    | 0.114                                 | 0.875   |
| Number of sleeping rooms <sup>a</sup>                   | 2.036                                    | 0.232                                 | 0.034** |
| Household has electricity? <sup>b</sup>                 | 0.2%                                     | 0.0%                                  | 0.827   |
| Household has radio? <sup>b</sup>                       | 65.1%                                    | 0.4%                                  | 0.897   |
| Household has bicycle? <sup>b</sup>                     | 49.9%                                    | 1.9%                                  | 0.699   |
| Household has motorbike? <sup>b</sup>                   | 0.8%                                     | -0.1%                                 | 0.879   |
| Household has paraffin lamp? <sup>b</sup>               | 93.9%                                    | 1.7%                                  | 0.815   |
| Household has oxcart? <sup>b</sup>                      | 5.1%                                     | -1.9%                                 | 0.198   |
| Agricultural household <sup>b</sup>                     | 100%                                     | -0.2%                                 | 0.422   |
| Main flooring material: dirt, sand or dung <sup>b</sup> | 92.4%                                    | -1.7%                                 | 0.565   |
| Main roofing material: natural material <sup>b</sup>    | 87.6%                                    | -1.7%                                 | 0.697   |
| Piped water <sup>b</sup>                                | 1.5%                                     | 2.2%                                  | 0.494   |
| Traditional pit toilet <sup>b</sup>                     | 78.3%                                    | 4.4%                                  | 0.356   |
| Wealth index <sup>a</sup>                               | -0.087                                   | 0.034                                 | 0.897   |
| <b>Woman characteristics</b>                            |                                          |                                       |         |
| Married <sup>b</sup>                                    | 71.8%                                    | -4.9%                                 | 0.046** |
| Completed primary education <sup>b</sup>                | 70.9%                                    | 2.8%                                  | 0.529   |
| Completed secondary education <sup>b</sup>              | 7.6%                                     | -2.2%                                 | 0.268   |
| Age <sup>a</sup>                                        | 24.592                                   | -0.993                                | 0.026** |
| Chewa <sup>b</sup>                                      | 95.4%                                    | -3.9%                                 | 0.452   |
| Christian <sup>b</sup>                                  | 98.3%                                    | 0.5%                                  | 0.609   |
| Farmer <sup>b</sup>                                     | 70.9%                                    | -4.5%                                 | 0.316   |
| Student <sup>b</sup>                                    | 16.4%                                    | 2.3%                                  | 0.380   |
| Small business owner <sup>b</sup>                       | 4.0%                                     | 2.1%                                  | 0.356   |
| N                                                       | 411                                      | 475                                   |         |

Notes: Household and mother level characteristics in 2004 corresponding to married main respondent mothers present in the second follow-up survey with children born after the intervention began in July 2005. <sup>a</sup> Continuous variable who which the mean is reported; <sup>b</sup> Binary variable, for which proportions are reported.

\*= p<0.1, \*\*=p<0.05, \*\*\*=p<0.01. p values are calculated using the wild cluster bootstrap-t procedure outlined in Cameron et al. (2008).

**TABLE 2: Distribution of family networks indicators in controls and differences with treatment group for sampled children.**

|                                   | Control group | Difference:<br>treatment -<br>control | p value | N    |
|-----------------------------------|---------------|---------------------------------------|---------|------|
| Maternal grandmother <sup>a</sup> | 87.3%         | 1.2%                                  | 0.739   | 2260 |
| Paternal grandmother <sup>a</sup> | 80.7%         | 6.3%                                  | 0.132   | 2252 |
| Mother's sisters <sup>b</sup>     | 2.835         | 0.047                                 | 0.835   | 2266 |
| Mother's brothers <sup>b</sup>    | 2.556         | 0.207                                 | 0.180   | 2263 |
| Father's sisters <sup>b</sup>     | 2.336         | 0.246                                 | 0.290   | 2266 |
| Father's brothers <sup>b</sup>    | 2.453         | 0.213                                 | 0.288   | 2267 |

Notes: <sup>a</sup>Binary variable for which percentages are reported. <sup>b</sup>Discrete, non-binary variables for which mean values are reported. Sample includes all children born since July 2005, who were aged 0-53 months at the time of interview, and whose mothers were married main respondents to the follow up surveys in 2008-09 and 2009-10. A pooled dataset from both follow-up surveys is used to construct means.

**Table 3: Relationship between baseline characteristics and family network size, with p-values**

Panel A: Household characteristics

|                                  | Number of members | Number of rooms | wealth Index |
|----------------------------------|-------------------|-----------------|--------------|
| Maternal grandmother alive (0/1) | 0.027             | -0.04           | 0.256**      |
| SE                               | (0.307)           | (0.103)         | (0.114)      |
| Cluster wild bootstrap t p-value | {0.929}           | {0.779}         | {0.032}      |
| Paternal grandmother alive (0/1) | -0.209            | -0.02           | -0.129       |
| SE                               | (0.276)           | (0.094)         | (0.186)      |
| Cluster wild bootstrap t p-value | {0.478}           | {0.919}         | {0.549}      |
| Parents siblings alive           | 0.025             | 0.01            | 0.016        |
| SE                               | (0.037)           | (0.011)         | (0.011)      |
| Cluster wild bootstrap t p-value | {0.627}           | {0.400}         | {0.144}      |
| N                                | 881               | 879             | 881          |

Panel B: Mother characteristics

|                                  | Primary education | Secondary education | Age       | Chewa   | Christian | Farmer  | Student   | Small business owner |
|----------------------------------|-------------------|---------------------|-----------|---------|-----------|---------|-----------|----------------------|
| Maternal grandmother alive       | 0.124*            | -0.028              | -4.463*** | 0.01    | -0.007    | -0.111* | 0.150***  | -0.046               |
| SE                               | (0.057)           | (0.033)             | (0.687)   | (0.039) | (0.010)   | (0.054) | (0.033)   | (0.029)              |
| Cluster wild bootstrap t p-value | {0.056}           | {0.396}             | {0.002}   | {0.863} | {0.657}   | {0.056} | {0.002}   | {0.160}              |
| Paternal grandmother alive       | 0.071**           | -0.004              | -2.845*** | 0.005   | 0.009     | -0.01   | 0.04      | -0.024               |
| SE                               | (0.032)           | (0.029)             | (0.563)   | (0.023) | (0.012)   | (0.036) | (0.024)   | (0.027)              |
| Cluster wild bootstrap t p-value | {0.028}           | {0.871}             | {0.002}   | {0.853} | {0.569}   | {0.739} | {0.104}   | {0.370}              |
| Parents siblings alive           | -0.004            | 0                   | 0.044     | 0.007   | 0         | 0.012** | -0.011*** | -0.003*              |
| SE                               | (0.004)           | (0.002)             | (0.069)   | (0.005) | (0.001)   | (0.004) | (0.003)   | (0.001)              |
| Cluster wild bootstrap t p-value | {0.346}           | {0.925}             | {0.537}   | {0.228} | {0.462}   | {0.024} | {0.004}   | {0.074}              |
| N                                | 881               | 881                 | 881       | 881     | 881       | 881     | 881       | 881                  |

Notes: OLS regressions of with baseline characteristics gathered in 2004 as the dependent variable and family networks as independent variables. Sample contains married main respondent mothers present in the second follow-up survey with children born after the intervention began in July 2005.. Standard errors computed using the cluster correlated Huber-White estimator are reported in parentheses and p-values in curly brackets. P values are calculated using the wild cluster bootstrap-t procedure outlined in Cameron et al. (2008). The wealth index was calculated using principal components analysis as recommended by [36].

\*= p<0.1, \*\*=p<0.05, \*\*\*=p<0.01

**TABLE 4: Estimated effects on height-for-age z-scores with 95% confidence intervals from three linear regression models**

|                            | Model 1     |                         | Model 2     |                         | Model 3     |                         |
|----------------------------|-------------|-------------------------|-------------|-------------------------|-------------|-------------------------|
|                            | Coefficient | 95% Confidence Interval | Coefficient | 95% Confidence Interval | Coefficient | 95% Confidence Interval |
| Treatment                  | 0.296***    | [0.116, 0.484]          | 0.441       | [-0.335, 1.028]         | 0.467       | [-0.344, 1.050]         |
| Maternal grandmother       |             |                         | -0.265**    | [-0.528, -0.021]        | -0.259**    | [-0.503, -0.019]        |
| Maternal grandmother*T     |             |                         | 0.168       | [-0.296, 0.615]         | 0.145       | [-0.324, 0.575]         |
| Paternal grandmother       |             |                         | 0.008       | [-0.200, 0.236]         | 0.006       | [-0.192, 0.238]         |
| Paternal grandmother*T     |             |                         | -0.253*     | [-0.529, 0.029]         | -0.235*     | [-0.493, 0.039]         |
| Mothers sisters            |             |                         | 0.031       | [-0.052, 0.103]         |             |                         |
| Mothers sisters*T          |             |                         | -0.056      | [-0.163, 0.057]         |             |                         |
| Fathers sisters            |             |                         | 0.002       | [-0.140, 0.140]         |             |                         |
| Fathers sisters*T          |             |                         | 0.042       | [-0.110, 0.188]         |             |                         |
| Mothers brothers           |             |                         | -0.001      | [-0.116, 0.082]         |             |                         |
| Mothers brothers*T         |             |                         | 0.024       | [-0.109, 0.170]         |             |                         |
| Fathers brothers           |             |                         | 0.016       | [-0.064, 0.115]         |             |                         |
| Fathers brothers*T         |             |                         | -0.034      | [-0.148, 0.075]         |             |                         |
| Total siblings of mother   |             |                         |             |                         | 0.016       | [-0.032, 0.062]         |
| Total siblings of mother*T |             |                         |             |                         | -0.019      | [-0.069, 0.037]         |
| Total siblings of father   |             |                         |             |                         | 0.01        | [-0.038, 0.054]         |
| Total siblings of father*T |             |                         |             |                         | 0.001       | [-0.080, 0.072]         |
| R-Squared                  | 0.19        |                         | 0.195       |                         | 0.193       |                         |
| N                          | 2017        |                         | 2017        |                         | 2017        |                         |

**Table notes:** OLS regressions with height for age (HAZ) scores as dependent variable. Model 1 estimates the overall effect of exposure to the program. Models 2 and 3 estimate regressions that allow the program effect to vary with different extended family members. Inference is conducted using the wild cluster bootstrap-t procedure recommended by Cameron et al (2008). 95% confidence intervals calculated according to the method recommended in Cameron and Miller (2015).

All regressions include the following controls: Cluster level controls: Education and Chewa ethnicity in 2004, Household level controls: A wealth index calculated in 2004, Mother level controls: Whether she had completed primary school, was working as a farmer or was a student in 2004, current age, age<sup>2</sup> and logarithmic height. Child level controls: Month of measurement, age, age<sup>2</sup>, gender, number of older siblings, number of older siblings<sup>2</sup>.

Sample includes all children born after the intervention start date in July 2005 to married main respondent mothers, who were aged 0-53 months at the time of measurement. Column 1 indicates the effect of intervention assignment on HAZ scores, for the sample where family networks information is not missing. Models 2-3 indicate how intervention effects on HAZ scores vary with the presence of different extended family members. \* = p<0.1, \*\* = p<0.05, \*\*\* = p<0.01

## Appendix 1

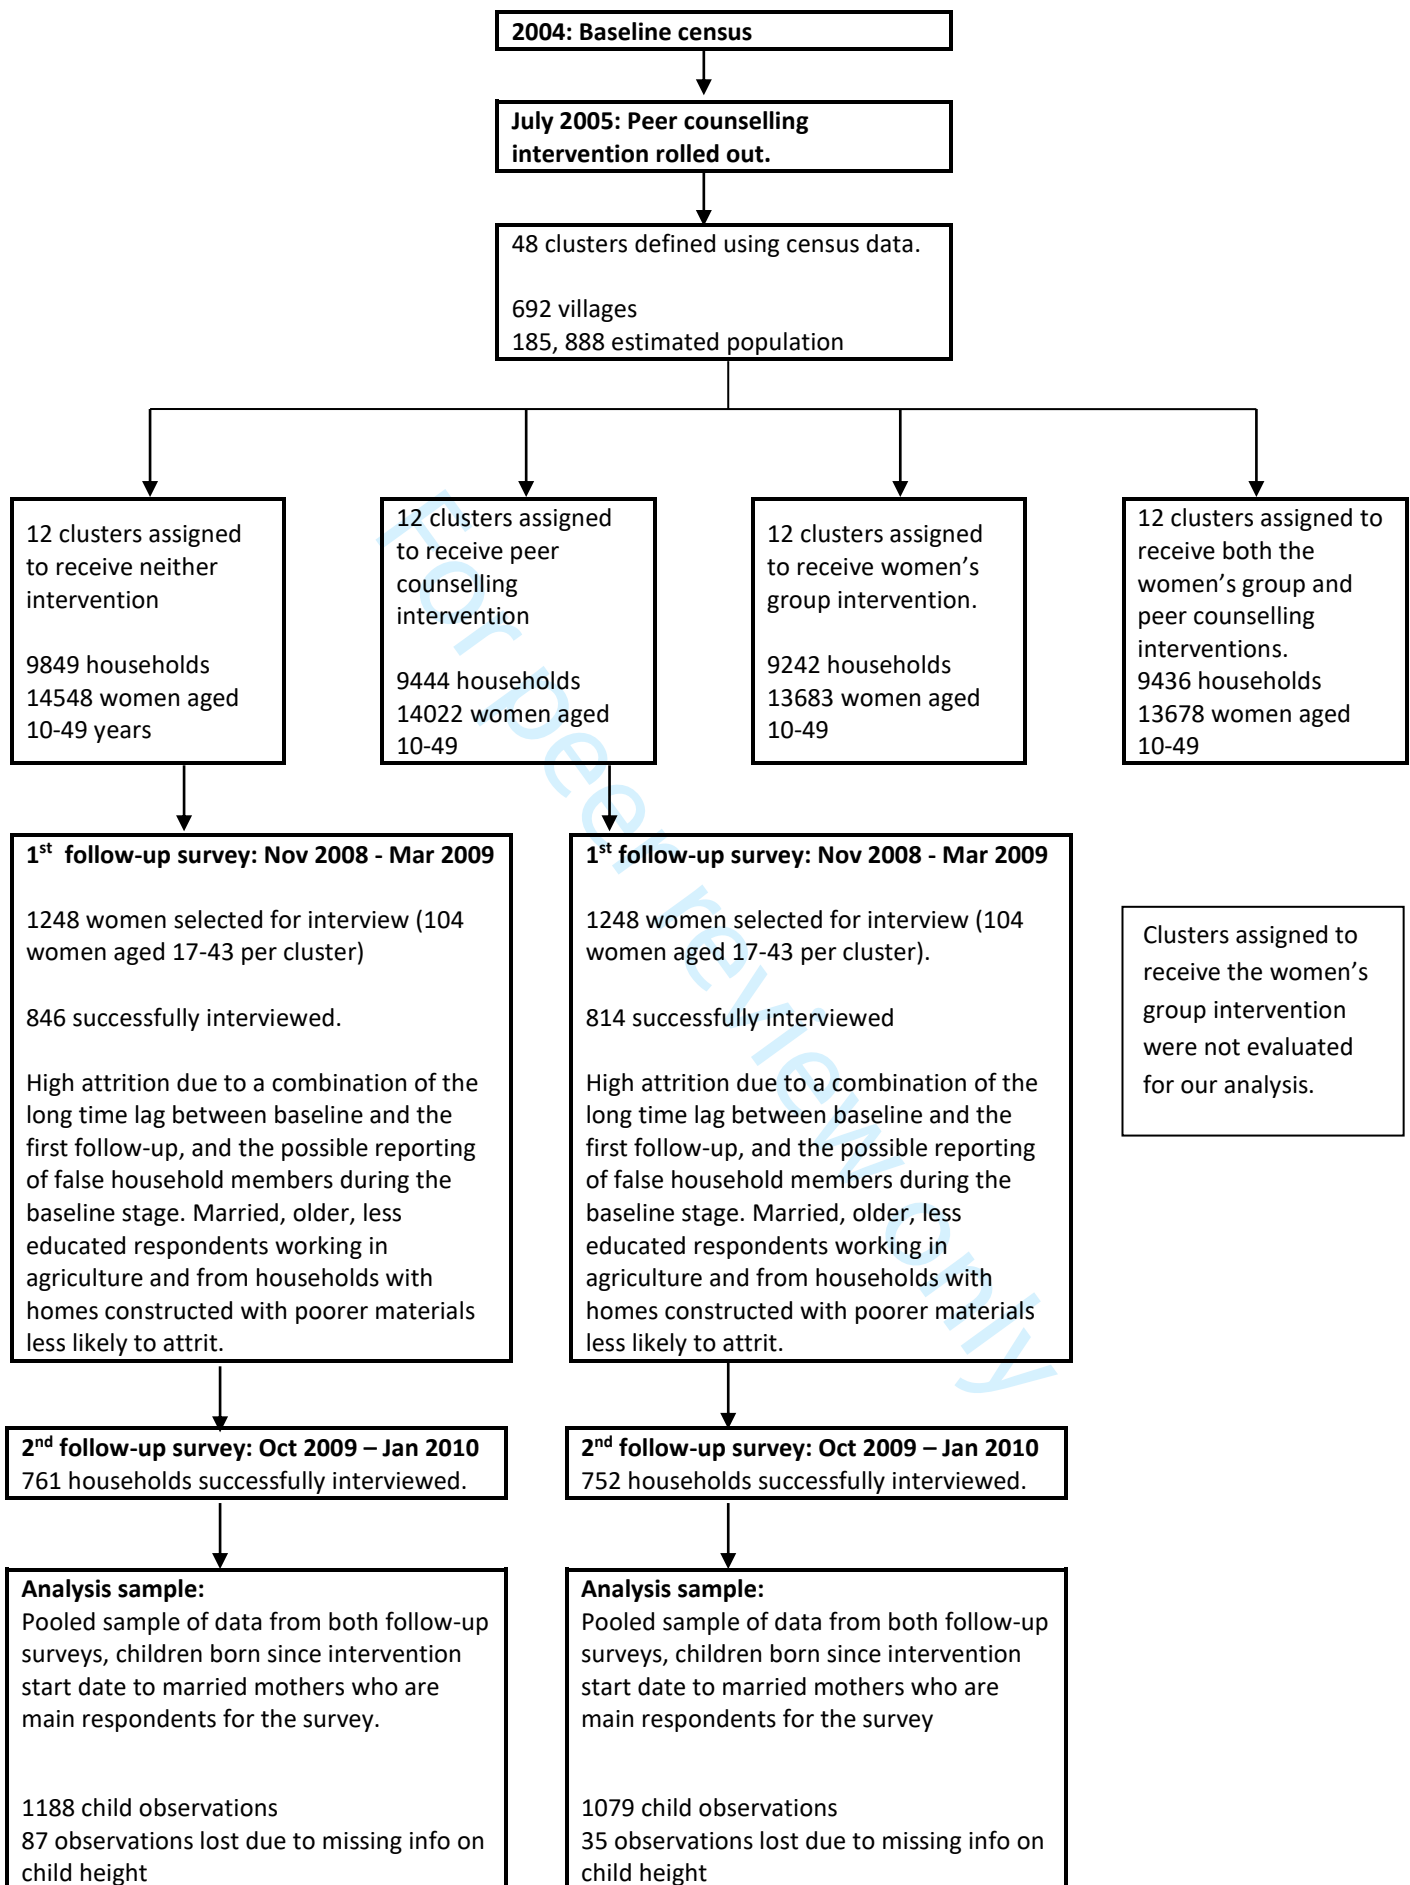

STROBE Statement—Checklist of items that should be included in reports of *case-control studies*

|                           | Item No | Recommendation                                                                                                                                                                                    | Complete?             |
|---------------------------|---------|---------------------------------------------------------------------------------------------------------------------------------------------------------------------------------------------------|-----------------------|
| <b>Title and abstract</b> | 1       | (a) Indicate the study's design with a commonly used term in the title or the abstract                                                                                                            | ✓                     |
|                           |         | (b) Provide in the abstract an informative and balanced summary of what was done and what was found                                                                                               | ✓ (pg 2)              |
| <b>Introduction</b>       |         |                                                                                                                                                                                                   |                       |
| Background/rationale      | 2       | Explain the scientific background and rationale for the investigation being reported                                                                                                              | ✓ (pg 4-5)            |
| Objectives                | 3       | State specific objectives, including any prespecified hypotheses                                                                                                                                  | ✓ (pg 6)              |
| <b>Methods</b>            |         |                                                                                                                                                                                                   |                       |
| Study design              | 4       | Present key elements of study design early in the paper                                                                                                                                           | ✓ (pg 6 – 7)          |
| Setting                   | 5       | Describe the setting, locations, and relevant dates, including periods of recruitment, exposure, follow-up, and data collection                                                                   | ✓ (pg 6 - 9, 12 - 13) |
| Participants              | 6       | (a) Give the eligibility criteria, and the sources and methods of case ascertainment and control selection. Give the rationale for the choice of cases and controls                               | ✓ (pg 6-9)            |
|                           |         | (b) For matched studies, give matching criteria and the number of controls per case                                                                                                               |                       |
| Variables                 | 7       | Clearly define all outcomes, exposures, predictors, potential confounders, and effect modifiers. Give diagnostic criteria, if applicable                                                          | ✓ (pg 8-9)            |
| Data sources/measurement  | 8*      | For each variable of interest, give sources of data and details of methods of assessment (measurement). Describe comparability of assessment methods if there is more than one group              | ✓ (pg 8-9)            |
| Bias                      | 9       | Describe any efforts to address potential sources of bias                                                                                                                                         | ✓ (pg 9-12)           |
| Study size                | 10      | Explain how the study size was arrived at                                                                                                                                                         |                       |
| Quantitative variables    | 11      | Explain how quantitative variables were handled in the analyses. If applicable, describe which groupings were chosen and why                                                                      | ✓ (pg 8-9)            |
| Statistical methods       | 12      | (a) Describe all statistical methods, including those used to control for confounding                                                                                                             | ✓ (pg 9-12)           |
|                           |         | (b) Describe any methods used to examine subgroups and interactions                                                                                                                               | ✓ (pg 9-12)           |
|                           |         | (c) Explain how missing data were addressed                                                                                                                                                       | ✓ (pg 8-9)            |
|                           |         | (d) If applicable, explain how matching of cases and controls was addressed                                                                                                                       |                       |
|                           |         | (e) Describe any sensitivity analyses                                                                                                                                                             | ✓ (pg 9-12)           |
| <b>Results</b>            |         |                                                                                                                                                                                                   |                       |
| Participants              | 13*     | (a) Report numbers of individuals at each stage of study—eg numbers potentially eligible, examined for eligibility, confirmed eligible, included in the study, completing follow-up, and analysed | ✓<br>(Appendix 1)     |
|                           |         | (b) Give reasons for non-participation at each stage                                                                                                                                              | ✓<br>(Appendix 1)     |
|                           |         | (c) Consider use of a flow diagram                                                                                                                                                                | ✓<br>(Appendix 1)     |
| Descriptive data          | 14*     | (a) Give characteristics of study participants (eg demographic, clinical,                                                                                                                         | ✓ (Table 1)           |

|                          |     |                                                                                                                                                                                                              |                |
|--------------------------|-----|--------------------------------------------------------------------------------------------------------------------------------------------------------------------------------------------------------------|----------------|
|                          |     | social) and information on exposures and potential confounders                                                                                                                                               |                |
|                          |     | (b) Indicate number of participants with missing data for each variable of interest                                                                                                                          | ✓ (Appendix 1) |
| Outcome data             | 15* | Report numbers in each exposure category, or summary measures of exposure                                                                                                                                    | ✓ (Table 1)    |
| Main results             | 16  | (a) Give unadjusted estimates and, if applicable, confounder-adjusted estimates and their precision (eg, 95% confidence interval). Make clear which confounders were adjusted for and why they were included | ✓ (Table 4)    |
|                          |     | (b) Report category boundaries when continuous variables were categorized                                                                                                                                    | ✓              |
|                          |     | (c) If relevant, consider translating estimates of relative risk into absolute risk for a meaningful time period                                                                                             |                |
| Other analyses           | 17  | Report other analyses done—eg analyses of subgroups and interactions, and sensitivity analyses                                                                                                               | ✓ (Table 4)    |
| <b>Discussion</b>        |     |                                                                                                                                                                                                              |                |
| Key results              | 18  | Summarise key results with reference to study objectives                                                                                                                                                     | ✓ (pg 14 - 16) |
| Limitations              | 19  | Discuss limitations of the study, taking into account sources of potential bias or imprecision. Discuss both direction and magnitude of any potential bias                                                   | ✓ (pg 19)      |
| Interpretation           | 20  | Give a cautious overall interpretation of results considering objectives, limitations, multiplicity of analyses, results from similar studies, and other relevant evidence                                   | ✓ (pg 16 – 19) |
| Generalisability         | 21  | Discuss the generalisability (external validity) of the study results                                                                                                                                        | ✓ (pg 16-19)   |
| <b>Other information</b> |     |                                                                                                                                                                                                              |                |
| Funding                  | 22  | Give the source of funding and the role of the funders for the present study and, if applicable, for the original study on which the present article is based                                                | ✓ (pg 20)      |

\*Give information separately for cases and controls.

**Note:** An Explanation and Elaboration article discusses each checklist item and gives methodological background and published examples of transparent reporting. The STROBE checklist is best used in conjunction with this article (freely available on the Web sites of PLoS Medicine at <http://www.plosmedicine.org/>, Annals of Internal Medicine at <http://www.annals.org/>, and Epidemiology at <http://www.epidem.com/>). Information on the STROBE Initiative is available at <http://www.strobe-statement.org>.

# BMJ Open

## Family networks and infant health promotion: a mixed-methods evaluation from a cluster randomised controlled trial in rural Malawi

|                                 |                                                                                                                                                                                                                                                                                                                                                                                                                                                                                         |
|---------------------------------|-----------------------------------------------------------------------------------------------------------------------------------------------------------------------------------------------------------------------------------------------------------------------------------------------------------------------------------------------------------------------------------------------------------------------------------------------------------------------------------------|
| Journal:                        | <i>BMJ Open</i>                                                                                                                                                                                                                                                                                                                                                                                                                                                                         |
| Manuscript ID                   | bmjopen-2017-019380.R2                                                                                                                                                                                                                                                                                                                                                                                                                                                                  |
| Article Type:                   | Research                                                                                                                                                                                                                                                                                                                                                                                                                                                                                |
| Date Submitted by the Author:   | 27-Mar-2018                                                                                                                                                                                                                                                                                                                                                                                                                                                                             |
| Complete List of Authors:       | Scott, Molly; Oxford Policy Management<br>Malde, Bansi; University of Kent, School of Economics; Insitute for Fiscal Studies, Centre for Evaluation of Development Policies<br>King, C.; UCL, Institute for Global Health<br>Phiri, Tambosi; MaiMwana Project,<br>Chapota, Hilda; MaiMwana Project,<br>Kainja, Esther; MaiMwana Project,<br>Banda, Florida; MaiMwana Project<br>Vera-Hernandez, Marcos; UCL; Insitute for Fiscal Studies, Centre for Evaluation of Development Policies |
| <b>Primary Subject Heading</b>: | Global health                                                                                                                                                                                                                                                                                                                                                                                                                                                                           |
| Secondary Subject Heading:      | Health policy                                                                                                                                                                                                                                                                                                                                                                                                                                                                           |
| Keywords:                       | Nutrition < TROPICAL MEDICINE, Extended Family, Health promotion, Sub-Saharan Africa, Child Health                                                                                                                                                                                                                                                                                                                                                                                      |
|                                 |                                                                                                                                                                                                                                                                                                                                                                                                                                                                                         |

SCHOLARONE™  
Manuscripts





1  
2  
3 **Family networks and infant health promotion: a mixed-methods evaluation from a**  
4 **cluster randomised controlled trial in rural Malawi**  
5  
6

7 **Authors:**  
8

9 Molly Scott<sup>1</sup>, Bansi Malde<sup>3,6\*</sup>, Carina King<sup>4</sup>, Tambosi Phiri<sup>5</sup>, Hilda Chapota<sup>5</sup>, Esther Kainja<sup>5</sup>, Florida  
10 Banda<sup>5</sup>, Marcos Vera-Hernandez<sup>2,3</sup>  
11  
12

13 **Affiliations:**  
14

- 15 1. Oxford Policy Management  
16 2. Department of Economics, University College London, UK  
17 3. Centre for Evaluation of Development Policies, Institute for Fiscal Studies, London, UK  
18 4. Institute for Global Health, University College London, UK  
19 5. MaiMwana Project, Mchinji, Malawi  
20 6. School of Economics, University of Kent, UK  
21  
22

23 **\*Corresponding author:**  
24

25 School of Economics, University of Kent, Canterbury, Kent CT2 7NZ, UK. E-mail:  
26 [b.k.malde@kent.ac.uk](mailto:b.k.malde@kent.ac.uk); Telephone: (+44)(0)1227816464  
27  
28  
29

30 **Keywords:** Extended Family; Child Health; Sub-Saharan Africa; Health Promotion; Child Nutrition  
31  
32  
33  
34  
35  
36  
37  
38  
39  
40  
41  
42  
43  
44  
45  
46  
47  
48  
49  
50  
51  
52  
53  
54  
55  
56  
57  
58  
59  
60

**Abstract:**

**Objective:** Parents may rely on information provided by extended family members when making decisions concerning the health of their children. We evaluate whether extended family members affected the success of an information intervention promoting infant health.

**Methods:** This is a secondary, sequential mixed-methods study based on a cluster randomised controlled trial of a peer home-education intervention conducted in Mchinji District, Malawi. We used linear multivariate regression to test whether the intervention impact on child height-for-age z-scores (HAZ) was influenced by extended family members. 12 of 24 clusters were assigned to the intervention, in which all pregnant women and new mothers were eligible to receive 5 home visits from a trained peer counsellor to discuss infant care and nutrition. We conducted focus group discussions with mothers, grandmothers and peer counsellors, and key-informant interviews with husbands, chiefs and community health workers to better understand the roles of extended family members in infant feeding.

**Results:** Exposure to the intervention increased child HAZ scores by 0.296 standard deviations (SD) (95% CI: 0.116, 0.484). However, this effect is smaller in the presence of paternal grandmothers. Compared to an effect size of 0.441 – 0.467 SD (95% CI: -0.344, 1.050) if neither grandmother is alive, the effect size was 0.235 (95% CI: -0.493, 0.039) to 0.253 (95% CI: -0.529, 0.029) SD lower if the paternal grandmother was alive. There was no evidence of an effect of parents' siblings. Maternal grandmothers did not affect intervention impact, but were associated with a lower HAZ score in the control group. Qualitative analysis suggested that grandmothers, who act as secondary caregivers and provide resources for infants, were slower to dismiss traditionally held practices and adopt intervention messages.

**Conclusion:** The results indicate that the intervention impacts are diminished by paternal grandmothers. Intervention success could be increased by integrating senior women.

**Strengths and Limitations:**

- Uses mixed methods to understand how extended family members affected the success of an infant feeding promotion program in Malawi
- Quantitative analysis, using linear multivariate regression, allows estimation of the size of effect different extended family members – including paternal and maternal grandmothers – have on the impact of the intervention
- Focus group discussions and key informant interviews help shed light on the mechanisms through which extended family members might have affected the intervention's success
- The interval between qualitative and quantitative data collection is a limitation, with potential changes to infant feeding practices over time and recall bias.
- Interventions on infant feeding would benefit from understanding and addressing extended family dynamics to improve reach and impact

## **Introduction**

Child health outcomes are influenced by individuals besides the mother and father, with a rich literature devoted to the contribution of extended family members [1], [2], [3], [4], [5]. In low-income settings, where risk of poor health is high and social welfare nets are minimal, the support of the extended family may be crucial in child-rearing [6]. Relatives can assist by acting as secondary caregivers [7], supplying labour, donating money and providing other in-kind resources to the household [8], [9], [10], [11]. Older women in the family can also affect child outcomes by dispensing infant health and nutrition advice to new mothers [12], [4], [13], [14], [5]. Finally, relatives may exert pressure on mothers, impacting their infant nutrition and health practices [15].

Extended family members may influence the effectiveness of policies and interventions designed to improve child health in low-income settings. On the one hand, they may provide resources and support that complement the intervention making it more effective. On the other hand, they could be resistant to change and reinforce traditional practices, thereby undermining interventions. The latter is particularly relevant in the case of health education and outreach programs, which are widespread across both developed and developing country settings.

Educational programs have the potential to improve child health outcomes by changing widespread misconceptions and traditional behaviours around child feeding and care in low-income settings. In Malawi, for instance, although most infants are breastfed for at least a year, only 40.5% of infants are still exclusively breastfed at 5 months [16]; while diets of children aged over 6 months usually lack sufficient diversity [17], [18]. Beliefs surrounding feeding practices for older infants include the view that the broth of soup is more nourishing than the vegetables or meat inside and that eggs are harmful for children aged 9 months.

1  
2  
3 Education campaigns promoting better infant feeding and care to care-givers of infants have  
4  
5 shown mixed success in developing country settings. In some cases, they have led to sustained  
6  
7 improvements in feeding practices [19], [14] and child physical growth [20], [21], [22]. In others,  
8  
9 they have had a negligible effect on child physical growth [23], [24], [25]. Given these mixed  
10  
11 findings, there is a need for greater understanding of the factors shaping responses to such  
12  
13 interventions across contexts.  
14  
15

16 Little attention has been paid to the role of extended family members in influencing the success  
17  
18 of care-giver focused education interventions in the existing literature, despite their important  
19  
20 role in shaping child health. Much of this existing literature is qualitative, with small samples [26],  
21  
22 [27]. The small number of quantitative evaluations of education interventions to improve infant  
23  
24 feeding that seek to involve extended family members find mixed evidence of effectiveness.  
25

26 Counselling sessions for new adolescent mothers and co-resident grandmothers reduced the un-  
27  
28 necessary intake of water and herbal teas within the first 6 months of the child's life in Brazil [28]  
29  
30 but failed to maintain breastfeeding of infants at age 2 years [29]; while a behavioural change  
31  
32 communication program delivered through older female leaders in Burkina Faso improved infant  
33  
34 feeding knowledge but failed to improve child health outcomes [14].  
35  
36

37  
38 A cluster randomised controlled trial (RCT) conducted in Malawi used a peer home-education  
39  
40 strategy to improve rates of exclusive breastfeeding, and reduce infant mortality (see Lewycka et  
41  
42 al. 2010, 2013 for further details [30], [31]). The trial achieved a 36% reduction in infant mortality  
43  
44 and an improvement in children's height-for-age z-score (HAZ) (increased by 0.271 standard  
45  
46 deviations;  $p=0.022$ ) [17] [31]. This paper uses mixed-methods to investigate whether members of  
47  
48 the extended family influenced the success of this peer home visiting intervention, and the  
49  
50 possible mechanisms through which their influence might work.  
51  
52  
53  
54  
55  
56  
57  
58  
59  
60

### **Methods:**

This is a secondary, sequential mixed-methods study based on a cluster RCT of a peer home-education intervention conducted in Mchinji District, Malawi. We investigate family member roles in the success of the intervention, which provided information on healthy infant feeding practices, with quantitative data collected between November 2008 and January 2010, and qualitative data collected in December 2015. Full details of the original trial and methods have previously been published [30] [31]. The quantitative data was collected and analysed first, and used to design the qualitative aspect of the study. The overall interpretation of our findings was integrated following analysis of the qualitative data.

### **Setting:**

Mchinji is a rural district in central Malawi with a population of about 455,000 [32]. Maternal and infant healthcare is delivered at one district hospital, four rural hospitals, nine health centres, private clinics, and in the community through government employed community health workers (CHW – known locally as Health Surveillance Assistants). Much of the healthcare received by pregnant women and infants is in the community setting by CHWs, or at home by kin and other social contacts. However, Malawi has medical pluralism, with traditional practices, beliefs and behaviours such as witchcraft and herbal medicine being commonly used alongside Western medicine. The 2010 Malawi Demographic and Health Survey reported 24% of births in the region occurred in the woman's own home and 2% in someone else's home, and many births are not attended by medically trained healthcare personnel but by traditional birth attendants (14.4%), friends and relatives (8.7%) or no one (2.6%) [16]. Without access to a skilled birth attendant, women are more vulnerable to infection and complications during birth; the infant mortality rate in 2010 was of 66 per 1000 live births [16].

1  
2  
3 Traditionally, the main ethnic group in the study area, the Chewa, are a matrilineal and matrilocal  
4 group. Matriliney is a system in which land is passed through the female line. Under traditional  
5 matrilineal norms, husbands move to their wives' homes after marriage unless they make a special  
6 payment. However, following the influence of patrilineal and patrilocal ethnic groups and British  
7 colonialists, there is evidence that matrilocality has waned over time, but not completely [33],  
8 [34]. As a result, women often remain in close proximity to their own relatives after marriage.

### 16 **Intervention Description**

19 For the RCT, Mchinji was divided into 48 approximately equal population clusters based on the  
20 1998 Malawi Population and Housing census (the most recent census at the time of trial  
21 planning). Within each cluster of around 8000 people, the 3000 individuals living in villages closest  
22 to the geographical centre were enumerated as the eligible study population. 12 clusters were  
23 assigned to the infant feeding intervention only and 12 served as controls. Full details of the trial  
24 set-up and methods are in Lewycka et al., 2010 [30]. All women living in clusters assigned to the  
25 infant feeding intervention who became pregnant during the trial period were eligible to receive  
26 five home visits from a trained local woman volunteer ('peer counsellor') to discuss maternal and  
27 infant healthcare issues; around 60% of eligible women reported having been visited. The visits  
28 were timed to coincide with key stages of infant development (the third trimester, and at one  
29 week, one month, three and five months after birth). Each visit focused on a specific set of topics  
30 for discussion, with special attention paid to nutrition practices including exclusive breastfeeding,  
31 and complementary feeding. Peer counsellors were literate local women aged 23-50 years with  
32 breastfeeding experience, who each covered a population of about 1000 people.

33  
34  
35  
36  
37  
38  
39  
40  
41  
42  
43  
44  
45  
46  
47  
48  
49 The intervention began in December 2004, with an initial establishment period until June 2005.

50  
51 The trial was on-going at the time of the quantitative data collection. Following the end of the  
52 trial period, peer counsellors continued to receive mentorship and supervision support from  
53 government CHWs and the local implementing NGO. In 2015, at the time of qualitative data  
54  
55  
56  
57

1  
2  
3 collection, approximately 1/3 of the volunteer counsellors were still active in delivering the  
4  
5 intervention.

## 6 7 8 **Quantitative Analysis:**

### 9 10 Data and Sample Selection:

11  
12 A baseline census was conducted in all clusters in 2004, prior to the start of the intervention. All  
13  
14 women aged between 10 and 49 were enumerated and a random sample of 104 women aged  
15  
16 between 17 and 43 per cluster was then drawn to be interviewed for two follow-up quantitative  
17  
18 surveys as part of this secondary study. Sampled women ('main respondent' hereon) were visited  
19  
20 to complete the first follow-up in November 2008-March 2009, and a second follow-up in October  
21  
22 2009 –January 2010.  
23  
24

25  
26 Each follow-up survey contained questions about the size of the extended family of the main  
27  
28 respondent and her husband (those alive and those in the village), the health of all household  
29  
30 members, food and liquid intake of children aged under 6 years, knowledge about child nutrition,  
31  
32 intervention participation (in treatment clusters), and socio-economic variables such as adult  
33  
34 work. The height of the main respondent and the height and weight of children under 6 years  
35  
36 were also collected by trained enumerators.  
37  
38

39  
40 The main outcome for our analysis is the child height-for-age z-score (HAZ score), which is a long-  
41  
42 term indicator of health that reflects nutrition and morbidity since birth, and should be sensitive  
43  
44 to any effects of intervention exposure in early life. It is calculated by comparing the height of the  
45  
46 child with the median height in the World Health Organization reference population of children of  
47  
48 the same gender and age in months [35].  
49

50  
51 The sample was balanced between treatment and control clusters along a range of variables  
52  
53 collected at baseline (see Fitzsimons et al (2016), Table 1 [17]). The baseline characteristics of the  
54  
55  
56  
57



1  
2  
3 two groups remained similar even after accounting for attrition between the baseline and first  
4  
5  
6  
7  
8  
9  
10  
11  
12  
13  
14  
15  
16  
17  
18  
19  
20  
21  
22  
23  
24  
25  
26  
27  
28  
29  
30  
31  
32  
33  
34  
35  
36  
37  
38  
39  
40  
41  
42  
43  
44  
45  
46  
47  
48  
49  
50  
51  
52  
53  
54  
55  
56  
57  
58  
59  
60

two groups remained similar even after accounting for attrition between the baseline and first  
endline survey, indicating that randomisation was not jeopardised.

For this analysis we use a sample of children who were born since July 2005; and whose mothers  
are married main respondents in the follow-up surveys (80% of the sample). This sample selection  
ensures that we measure effects on children whose mothers were eligible to receive visits from a  
peer counsellor; and allows us to compare effects of the mothers' relatives with those of her  
husband. Children in the estimation sample were aged between 0 and 53 months at the time of  
the endline surveys. Appendix 1 provides a timeline of the original trial and the quantitative data  
collection, and of our sample inclusion criteria.

Table 1 presents the means of basic demographic and socio-economic characteristics for women  
in the analysis sample living in control clusters at baseline, the differences in the means between  
the control and treatment groups, and the p-value of this difference. The last two columns allow  
us to assess whether the randomisation holds in our selected sample. Women assigned to the  
control group were 24.6 years on average. 71.8% were married and while 70.1% had completed at  
least primary education, only 7.6% had completed secondary education. In line with the general  
profile of communities in Mchinji, 95.4% of sampled women were Chewa ethnicity and 98.3%  
were Christian. The average household size was 5.6 members and all households were engaged in  
agricultural activity.

Table 2 displays statistics on the size of extended family networks of the children in our analysis  
sample. Most children have their grandmothers alive (87.3% have maternal grandmothers alive  
and 80.7% have paternal grandmothers) and their parents have a relatively large number of  
siblings, with an average of more than two brothers and two sisters each.

### Model Specification and Estimation

The quantitative analysis aims to determine how different family members influence the effectiveness of the infant feeding intervention. Before estimating the main model, we study the relationship between baseline characteristics of mothers and their households and measures of the extended family using linear regression. Table 3 reports these results. It indicates that children whose grandmothers are alive have on average younger mothers, who are more likely to have completed at least primary education, less likely to be working as farmers in 2004, and are from more socioeconomically advantaged households, as measured by a composite wealth index constructed using principal components analysis as recommended by [36].

Our main specification is the following linear multivariate regression:

$$\begin{aligned}
 HAZ_{ij} = & \alpha + \beta T_j + \beta_2 \text{Maternal\_grandmother}_{ij} + \beta_3 \text{Maternal\_grandmother}_{ij} * T_j \\
 & + \beta_4 \text{Paternal\_grandmother}_{ij} + \beta_5 \text{Paternal\_grandmother}_{ij} * T_j \\
 & + \beta_6 \text{Total\_mothers\_siblings}_{ij} + \beta_7 \text{Total\_mothers\_siblings}_{ij} * T_j \\
 & + \beta_8 \text{Total\_fathers\_siblings}_{ij} + \beta_9 \text{Total\_fathers\_siblings}_{ij} * T_j + X_{ij} \gamma \\
 & + Z_j \gamma_2 + t + \epsilon_{ij}
 \end{aligned}$$

where  $HAZ_{ij}$  is the height-for-age z-score of child  $i$  in cluster  $j$ .  $T_j$  is a treatment exposure indicator which captures whether the child was born to a mother living in 2004 (pre-intervention) in a cluster that was assigned to receive the program. We therefore use an intent-to-treat estimator.  $\text{Maternal\_grandmother}_{ij}$  and  $\text{Paternal\_grandmother}_{ij}$  are binary variables indicating, respectively, whether the maternal and paternal grandmother is alive.  $\text{Total\_mothers\_siblings}_{ij}$  ( $\text{Total\_fathers\_siblings}_{ij}$ ) captures the total number of siblings of the child's mother (father) who are alive. We use two definitions of this variable in different specifications of the model: (i) Brothers and sisters (separately) of each parent, and (ii) the total siblings of each parent.  $X_{ij}$  and  $Z_j$  are vectors of control variables at the individual and cluster level respectively. These include all baseline characteristics where significant differences between households with different

1  
2  
3 extended family members alive were detected, and interview month and year indicators to  
4  
5 account for month-year-specific shocks. We do not adjust the data for missing information.  
6

7  
8 We fitted three models, one crude model with the intervention term only, and two full models as  
9  
10 specified in the equation each treating parent siblings differently.  
11

12  
13 The coefficient  $\beta$  captures the effect of the program for children whose maternal and paternal  
14  
15 grandmothers are dead, and whose parents are only children, while the coefficients  $\beta_2, \beta_4, \beta_6$  and  
16  
17  $\beta_8$ , represent the effects of the extended family members on HAZ scores in the control group.  
18

19  
20 The coefficients  $\beta_3, \beta_5, \beta_7$  and  $\beta_9$ , associated with interaction terms between variables capturing  
21  
22 extended family relations and the indicator for program allocation, estimate the additional effect  
23  
24 of the program for children with different types and numbers of extended family members. A  
25  
26 positive (or negative) significant interaction provides evidence that the program effect is  
27  
28 enhanced (or diminished) in the presence of that particular family member.  
29

30  
31 Errors  $\epsilon_{ij}$  are assumed to be uncorrelated between individuals in different clusters but are allowed  
32  
33 an unrestricted correlation structure within clusters. To account for correlation within clusters,  
34  
35 standard errors must be adjusted to prevent downward bias, and incorrect inference. Given the  
36  
37 small number of clusters in the study (12 intervention and 12 control clusters), we adopt wild  
38  
39 cluster bootstrap methods as recommended in Cameron et al. (2008) [37]. Associated 95%  
40  
41 confidence intervals can be calculated using a computationally intensive method suggested in  
42  
43 [38]. The bootstrap adjustment applied here was studied in detail by Fitzsimons et al (2016) and  
44  
45 was found to perform well [17]. Data from both follow-up surveys is pooled to improve statistical  
46  
47 power.  
48

49  
50 The extended family network is defined according to which members of the family are alive,  
51  
52 rather than which ones live in the same village or household. This is in case treatment exposure  
53  
54 affected decisions over where to live, which would cause a measure of family network size based  
55  
56  
57

1  
2  
3 on residence to be correlated with the intervention, and thereby bias estimates. The benefit of  
4 defining the size of the family network according to which members are alive is that this is almost  
5 certain to be invariant to program exposure.  
6  
7

8  
9  
10 We choose to define  $T_j$  by exposure to the intervention rather than actual participation since  
11 participation in the program was voluntary and also relied on the ability of peer counsellors to  
12 locate eligible women. Women who peer counsellors did not manage to trace or who chose not  
13 to take part in the program may be different from those who did participate. The existence of  
14 such systematic differences would potentially introduce some unobserved correlation between  
15 the treatment interaction variables and HAZ scores if  $T_j$  were defined on the basis of actual  
16 participation. Indeed, Fitzsimons et al. (2016) report that women who received the visits tend to  
17 be poorer [17]. Defining treatment based on residence at baseline rather than at the time of the  
18 follow-up interviews also alleviates concerns of bias in case there was purposeful migration into  
19 treated areas by control-group assigned households.  
20  
21  
22  
23  
24  
25  
26  
27  
28  
29

### 30 31 **Qualitative Analysis**

32  
33  
34 Following the findings from the quantitative analysis, we conducted focus group discussions  
35 (FGDs) with grandmothers, mothers and peer counsellors, and semi-structured interviews with  
36 fathers, CHWs and village chiefs to gain a more in-depth understanding of family roles and how  
37 grandmothers might influence child health.  
38  
39  
40  
41  
42  
43

### 44 **Recruitment**

45  
46  
47 Participants were recruited from 11 of 24 intervention and control clusters across the district in  
48 late 2015. Mothers, grandmothers and fathers were purposively selected by CHWs and chiefs to  
49 represent those households who had actively received the intervention or had children under-5  
50 years in control clusters. Volunteer peer counsellors were contacted directly, to represent a range  
51 of ages and years' experience as counsellors. Chiefs and CHWs were purposively selected and  
52  
53  
54  
55  
56  
57  
58  
59  
60

1  
2  
3 contacted directly to represent clusters with a range of engagement with the intervention. We  
4  
5 planned to conduct a total of five FGDs and 10 interviews, rather than collecting data until  
6  
7 saturation was reached.  
8  
9

#### 10 Data Collection:

11  
12 FGDs and interviews used topic guides, based on the quantitative findings and wider literature on  
13  
14 infant feeding behaviours, covering: household decision making around feeding, infant feeding  
15  
16 practices, feeding knowledge and sources of information about infant feeding. We asked about all  
17  
18 household members, and specifically probed about the role of grandmothers. All discussions were  
19  
20 facilitated by two local trained qualitative researchers in Chichewa. Participants were reimbursed  
21  
22 for their travel expenses and given refreshments. All discussions were audio recorded, and then  
23  
24 verbatim transcribed in Chichewa. Transcripts were translated into English as a group, with  
25  
26 ambiguous terms or phrases debated until a consensus meaning was reached. Data collection,  
27  
28 transcription and translation were conducted by EK, HC, TP and FM – female Malawian  
29  
30 researchers who are fluent in English.  
31  
32  
33

#### 34 Analysis

35  
36  
37 The English transcripts were coded using an inductive framework approach based on the  
38  
39 following steps: familiarisation, coding, developing and applying the framework, charting and  
40  
41 interpretation [39]. All transcripts were double-coded, as a group by TP, EK, HC and FB and  
42  
43 independently by CK – a female British researcher with five years' work experience in Malawi.  
44  
45 Coding was done on paper and the coding matrix developed in Microsoft Excel. A round-table  
46  
47 discussion was then conducted by all five researchers to compare the codes and agree on themes;  
48  
49 disagreements in coding were discussed until an agreement on the interpretation was reached.  
50  
51  
52

#### 53 Patient and Public Involvement

1  
2  
3 The original trial was conducted with extensive community engagement, including initial planning  
4 and dissemination meetings with village, healthcare and local government committees. These  
5 groups were involved in the recruitment of participants for interviews and focus group discussions.  
6  
7  
8  
9 The quantitative survey instruments were pre-tested on households living in buffer areas.

## 10 11 **Ethics**

12  
13  
14 All participants gave informed written consent. Ethical approval to conduct this study was  
15 obtained from the National Health Sciences Research Committee in Malawi [Protocol Numbers:  
16  
17 491; 15/9/1483].  
18  
19  
20

## 21 **Results**

### 22 Quantitative Analysis:

23  
24  
25 Table 4 displays the results of the quantitative analysis on child HAZ scores. Model 1 shows that  
26  
27 overall exposure to the program raised HAZ scores by 0.296 (95% CI: 0.116, 0.484) standard  
28  
29 deviations (SD). Models 2 and 3 present the results for the regressions that test whether different  
30  
31 family members influenced the effectiveness of the intervention on child HAZ scores. Model 2  
32  
33 presents the results where we allow for brothers and sisters of the child's parents to have  
34  
35 different effects, while Model 3 displays those including (separately) the total siblings of each of  
36  
37 the child's parents.  
38  
39  
40  
41  
42

43 For children whose parents have no living mothers or siblings, the effect of the intervention on  
44  
45 HAZ scores is between 0.441 (95% CI: -0.335, 1.028) and 0.467 (95% CI: -0.344, 1.050) SD.  
46

47 However, for those children with a living paternal grandmother, the intervention effect was  
48  
49 reduced by between 0.235 (95% CI: -0.493, 0.039) and 0.253 (95% CI: -0.529, 0.029) SD. The  
50  
51 results also suggest that, in the control group, children whose maternal grandmothers are alive  
52  
53 have HAZ scores that are between 0.259 (95% CI: -0.0503, -0.019) and 0.265 (95% CI: -0.528, -  
54  
55 0.021) SD lower. The coefficient on the interaction term between having a living maternal  
56  
57

1  
2  
3 grandmother and the indicator for the intervention allocation is positive, but statistically  
4  
5 insignificant at the 10% level of significance (magnitude of between 0.145 (95% CI: -0.324, 0.575)  
6  
7 and 0.168 (95% CI: -0.296, 0.615) SDs). Finally, the results uncover no association between the  
8  
9 number of parents' siblings on HAZ scores, or of differential effects of the intervention by these.

#### 10 11 12 Qualitative Analysis:

13  
14 We conducted 5 FGDs, with 37 participants of 48 invited (mothers=16; grandmothers=15; peer  
15  
16 counsellors=6), and 10 semi-structured interviews (village chiefs=4, fathers=4; CHW=2). We  
17  
18 defined the following emergent themes in relation to grandmothers and their role in infant  
19  
20 feeding and growth: decision-making roles, knowledge and information, traditional practices and  
21  
22 intervention successes and challenges around behaviour change.  
23  
24

25  
26 **Decision-Making Roles:** Across the respondents there was agreement that the father is responsible  
27  
28 for resource allocation and mobilisation, while the mother's role is to manage and prepare food for  
29  
30 the household. When there is a lack of food or resources, extended family members or neighbours  
31  
32 can provide assistance, for example "*maybe you have found you don't even have flour, our sister in*  
33  
34 *law or mother in law gives it to you saying that it's only for the child, prepare porridge so that it*  
35  
36 *should eat*" (Mother 5, Control). Within the household, grandmothers, both maternal and paternal,  
37  
38 were generally viewed as the secondary caregivers, providing support by cooking for and feeding  
39  
40 infants.  
41  
42

43  
44 **Information and Knowledge:** Sources of information about infant feeding included: antenatal clinics  
45  
46 and other healthcare, family members, village chiefs and community meetings, the peer counsellor  
47  
48 intervention and other NGOs and civil society education programmes. Interestingly, the peer  
49  
50 counsellors were reported as a source of information by participants from control areas, likely  
51  
52 reflecting contamination following the end of the trial period. Although grandmothers report giving  
53  
54 similar advice as that given by healthcare workers:  
55  
56  
57  
58  
59  
60

1  
2  
3 *“now we are afraid, so we provide the same advice they give at the clinic, so we tell them the same*  
4 *things”* (Grandmother 7, Intervention),  
5

6  
7  
8 However, reports from peer counselors cast doubt on this. They instead mentioned encountering  
9  
10 difficulties with grandmothers when disseminating their advice: *“frequently the grandmothers*  
11 *mislead, mislead them as they say what they were doing before in their time”* (Peer Counselor 5).  
12  
13

14  
15 Peer counselors, however, also noticed a change over time in attitudes among grandmothers, with  
16  
17 increased acceptance of the intervention messages: *“the group of relatives which gives the most*  
18 *problems is the grandparents because they tell the woman that ‘aah [the counselors] are just*  
19 *cheating you, they want this child to be crying’ [...] but we have seen that the grandmothers now*  
20 *have understood”* (Peer Counselor 4).  
21  
22  
23

24  
25  
26 Despite extended family members not being the target group of the intervention, breastfeeding,  
27  
28 weaning and complementary feeding messages appear to have disseminated, with fathers (*“advice*  
29 *about breast feeding, I know a lot; when a child is born he should breast feed exclusively, very*  
30 *frequently”* – Father 1, Intervention) and grandmothers (*“so they say breastfeed frequently these*  
31 *days, that’s the modern way of childbirth, so you also say breastfeed the child”* – Grandmother 2,  
32  
33  
34 Intervention) demonstrating accurate knowledge.  
35  
36  
37

38  
39 ***Traditional Practices:*** Several different traditional practices and beliefs about infant feeding were  
40  
41 mentioned by all respondent types, including: adding medicinal herbs to infants’ porridge; believing  
42  
43 children become “foolish” is breastfed for too long; and smaller portions making children “smart”.  
44  
45 However, mothers and grandmothers in both intervention and control areas commented that while  
46  
47 these practices and beliefs are known to exist, they are no longer commonplace (*“most of this*  
48 *generation do not follow [these practices]”* – Mother 8, Control) or rituals and the giving of herbal  
49  
50 medicines is done in hiding. This was confirmed by one of the CHW who commented that: *“while*  
51  
52  
53  
54  
55  
56  
57  
58  
59  
60



1  
2  
3 *the grandmothers and the other people have their own beliefs, our role is to get rid of those beliefs*  
4  
5 *[...] little by little people change"* (CHW 2, Intervention).  
6  
7

8 **Behaviour Change:** Community members reported sustained behaviour change relating to exclusive  
9  
10 breastfeeding and facility-based deliveries: *"behaviour these days has changed in that delivering at*  
11 *home is no longer there [...] we say go to the hospital"* (Grandmother 5, Intervention). However,  
12  
13 CHW and peer counselors noted that these changes were not seen immediately, and that barriers  
14  
15 such as lack of engagement, lack of understanding and cultural issues (e.g. urban women 'looking  
16  
17 down' on the counselors) were present.  
18  
19

### 20 21 **Discussion:**

22  
23 Our mixed-methods evaluation of the effect of extended family members on the impact of a peer-  
24  
25 led home education intervention in rural Malawi suggests that living paternal grandmothers can  
26  
27 be a barrier to intervention dissemination and behaviour change. The qualitative findings  
28  
29 complement the quantitative results, and suggest the mechanism through which grandmothers  
30  
31 may influence the effectiveness of the peer intervention.  
32  
33

34  
35 The apparently negative influence of paternal grandmothers on intervention success may be due  
36  
37 to a conflict between their views on infant feeding from the recommendations of peer  
38  
39 counsellors. The qualitative findings offer some support for this hypothesis by providing evidence  
40  
41 that grandmothers are proponents of 'traditional' views of child feeding that differ from standard  
42  
43 recommendations, supported by previous studies [4], [12]. They indicate that grandmothers  
44  
45 persist in their traditional beliefs for longer, and as providers of both financial and childcare  
46  
47 support, exert influence towards their own beliefs of child feeding rather than towards the  
48  
49 information provided by the intervention. Reassuringly though, our qualitative data suggest that  
50  
51 grandmothers eventually adjust their practices to be in line with the information provided by the  
52  
53 intervention.  
54  
55  
56  
57  
58  
59  
60

1  
2  
3 Interestingly, the qualitative data was not able to distinguish between paternal and maternal  
4 grandmothers, despite other evidence that, at least in Malawi, it is paternal grandmothers who  
5 command the most influence [12]. This may explain why we do not find a similar negative effect  
6 on intervention success associated with maternal grandmothers in the quantitative analysis.  
7  
8 However, our ability to speculate on different mechanisms of action between maternal and  
9 paternal grandmothers is limited.  
10  
11  
12  
13  
14  
15

16 The delays seen in attitude change amongst grandmothers from the qualitative data suggest that  
17 there may be potential to increase the intervention's impact further by engaging extended family  
18 members in the information exchange process. A growing body of evidence underscores the  
19 benefits of more inclusive approaches to health education [40], [12], [13], [14], and cautions  
20 against assuming that new information will necessarily be incorporated into knowledge and  
21 behaviour. Actual response will, in general, depend on the mode of transmission. Approaches that  
22 treat users of information as passive are less likely to be effective than those that foster dialogue  
23 within the target communities.  
24  
25  
26  
27  
28  
29  
30  
31  
32  
33

34 In contexts where older women exert particular influence, there are clear grounds for designing  
35 interventions that respect and acknowledge their seniority. The rationale behind the work of  
36 organisations like the Grandmother Project is that elder women can act as powerful agents for  
37 change if they are mobilised and empowered to support intervention aims [4], [12]. We consider  
38 our findings to provide support for this agenda. However, it must be noted that involving senior  
39 women in interventions might not be sufficient to improve child health, particularly in contexts  
40 where poor nutrition is not the only cause for poor health. Evidence from the evaluation of an  
41 integrated agriculture and nutrition and health behaviour change communication programme  
42 indicates that senior women can be effective in changing knowledge, but this improved  
43 knowledge might still fail to yield improvements in child growth [14].  
44  
45  
46  
47  
48  
49  
50  
51  
52  
53  
54  
55  
56  
57  
58  
59  
60

1  
2  
3 We uncover a negative association of maternal grandmothers in the control group. However, this  
4  
5 cannot be taken as evidence of a causal effect, because of the presence of confounders such as a  
6  
7 higher competition for resources in families with living maternal grandmothers in matrilineal  
8  
9 societies [41].  
10

11  
12 The qualitative findings also raise the importance of the role of men as key providers and resource  
13  
14 mobilisers. Previous quantitative evidence Fitzsimons et al (2016) [17] supports the critical role of  
15  
16 males in ensuring adoption of the information provided. Therefore, integrating these influential  
17  
18 figures with the peer counsellor intervention may help improve uptake and reduce the time to  
19  
20 intervention acceptance we currently observe.  
21

22  
23 In this study there were several limitations. Firstly, it is impossible to ascertain whether the  
24  
25 estimated quantitative detrimental effect of grandmothers is due to their presence and not  
26  
27 because households in which the paternal grandmother is alive are different in some  
28  
29 characteristic that is omitted from the regression and that affects the effectiveness of the  
30  
31 intervention. The survey and qualitative data may be subject to social desirability bias, with  
32  
33 respondents providing answers which they think will please the researchers. As the qualitative  
34  
35 and quantitative data triangulated, and respondents were not aware of our hypothesis, we do not  
36  
37 feel this considerably biased our conclusions. Finally, the mixed data were collected sequentially  
38  
39 rather than concurrently, with the qualitative data collection conducted five years after the  
40  
41 quantitative survey. This may have resulted in recall bias in the qualitative data, and the culture  
42  
43 and behaviours around infant feeding may have shifted between the two study phases. This is  
44  
45 somewhat supported by the FGDs and interviews from control areas being exposed to the peer  
46  
47 counsellors and their messages, posing a challenge to integrating the results. However, as the  
48  
49 qualitative data was planned to provide a more in-depth understanding and triangulation of the  
50  
51 quantitative findings, rather than comment on causality, we do not feel this detracts from our  
52  
53 interpretation.  
54  
55  
56  
57  
58  
59  
60

1  
2  
3 We found that paternal grandmothers play an important role in shaping responses to an  
4 information campaign targeting infant health. In order to increase the impact of information  
5 campaigns, our findings suggest that excluding influential older women, who act as both  
6 important sources of advice and childcare support, can weaken intervention impact by exposing a  
7 divergence between traditional views and new information. Inclusive health education  
8 approaches that respect the need to tackle existing traditional beliefs and the roles that  
9 grandmothers play, may overcome this friction and improve the effectiveness of the intervention.  
10  
11  
12  
13  
14  
15  
16  
17  
18  
19  
20  
21  
22  
23  
24  
25  
26  
27  
28  
29  
30  
31  
32  
33  
34  
35  
36  
37  
38  
39  
40  
41  
42  
43  
44  
45  
46  
47  
48  
49  
50  
51  
52  
53  
54  
55  
56  
57  
58  
59  
60

1  
2  
3 Acknowledgements: We thank Andrew Mganga, Nicholas Mbwana, Christopher Kamphinga, Sonia  
4 Lewycka, Mikey Rosato and Julia Behrman for advice and assistance with quantitative data  
5 collection. We also thank Ravi Somani for his assistance in coding the program to obtain the  
6 confidence intervals.

7  
8 Funding: Funding from the ESRC/DFID grant ES/J009253/1 is gratefully acknowledged.

9  
10 Conflict of interest: We declare that we have no conflicts of interest.

11  
12 Authors contributions: All authors provided final approval of the version to be published. Concept  
13 and design of quantitative analysis: MS, BM and MV; analysis and interpretation of quantitative  
14 findings: MS, MV and BM; drafting the article and revising it critically: MS, BM, CK and MV.  
15 Concept and design of the qualitative study: BM, MVH, CK and TP. Qualitative data collection and  
16 analysis: TP, HC, EK, FB. Qualitative analysis was independently checked and coded: CK. CK, TP, EK,  
17 HC and FB discussed and agreed the final interpretation.

18  
19  
20 Data sharing: The raw quantitative data is available for download from the UK Data Archive.  
21  
22  
23  
24  
25  
26  
27  
28  
29  
30  
31  
32  
33  
34  
35  
36  
37  
38  
39  
40  
41  
42  
43  
44  
45  
46  
47  
48  
49  
50  
51  
52  
53  
54  
55  
56  
57  
58  
59  
60

## References

- [1] D. LaFave and D. Thomas, "Extended Families and Child Well-being," *Journal of Development Economics*, vol. 126, no. C, pp. 52-65, 2017.
- [2] P. Sheppard and R. Sear, "Do grandparents compete with or support their grandchildren? In Guatemala, paternal grandmothers may compete, and maternal grandmothers may cooperate," *Royal Society Open Science*, vol. 3, no. 160069, 2016.
- [3] B. Strassman and W. Garrard, "Alternatives to the grandmother hypothesis: A meta-analysis of the association between grandparental and grandchild survival in patrilineal populations," *Human Nature*, vol. 22, no. 1, p. 201, 2011.
- [4] J. Aubel, I. Touré and M. Diagne, "Senegalese grandmothers promote improved maternal and child nutrition practices: the guardians of traditional are not averse to change.," *Social Science & Medicine*, 59(5), pp. 945-959, 2004.
- [5] M. Gupta, R. Aborigo, P. Adongo, S. Rominski, A. Hogdson, C. Engmann and C. Moyer, "Grandmothers as gatekeepers? The role of grandmothers in influencing health-seeking for mothers and newborns in rural Ghana," *Global Public Health*, vol. 10, no. 9, pp. 1078-1091, 2015.
- [6] S. B. Hrdy, *Mother nature: A history of mothers, infants, and natural selection.*, New York: Pantheon Books, 1999.
- [7] P. K. Ivey, "Cooperative Reproduction in Ituri Forest Hunter-Gatherers: Who Cares for Efe Infants? 1.," *Current Anthropology*, 41.5, pp. 856-866, 2000.
- [8] M. A. Gibson and R. Mace, "Helpful Grandmothers in rural Ethiopia: A study of the effect of kin on child survival and growth," *Evolution and Human Behaviour* 26(6), pp. 469-482, 2005.
- [9] R. Lee and K. Kramer, "Children's Economic Roles in the Maya Family Life Cycle: Cain, Caldwell, & Chayanov Revisited," *Population and Development Review*, Vol. 28, No. 3, pp. 475-499, 2002.
- [10] M. Angelucci, G. De Giorgi, M. Rangel and I. Rasul, "Family networks and school enrolment: Evidence from a randomised social experiment.," *Journal of Public Economics*, 94(3), pp. 197-221, 2010.
- [11] E. Duflo, "Grandmothers and Granddaughters: Old-Age Pensions and Intrahousehold Allocation in South Africa," *World Bank Economic Review*, vol. 17, no. 1, pp. 1-25, 2003.
- [12] R. Bezner-Kerr, L. Dakishoni, L. Shumba, R. Msachi and M. Chirwa, ""We grandmothers know plenty": breastfeeding, complementary feeding and the multifaceted role of grandmothers in Malawi.," *Social Science & Medicine*, 66(5), pp. 1095-1105, 2008.

- 1  
2  
3 [13] J. Aubel and D. Sihalathavong, "Participatory communication to strengthen to role of  
4 grandmothers in child health: an alternative paradigm for health education and health  
5 communication.," *Journal of International Communication*, 7(2), pp. 76-97, 2001.  
6  
7  
8 [14] D. K. Olney, A. Pedehombga, M. T. Ruel and A. Dillon, "A 2-Year Integrated Agriculture and  
9 Nutrition and Health Behavior Change Communication Program Targeted to Women in Burkina  
10 Faso Reduces Anemia, Wasting and Diarrhea in Children 3-12.9 Months of Age at Baseline: A  
11 Cluster-Randomized Controlled Trial," *The Journal of Nutrition*, vol. 145, no. 6, pp. 1317 - 1324,  
12 2015.  
13  
14 [15] O. Agunbiade and O. Ogunleye, "Constraints to exclusive breastfeeding practice among  
15 breastfeeding mothers in Southwest Nigeria: implications for scaling up," *International*  
16 *Breastfeeding Journal*, vol. 7, no. 1, p. 5, 2012.  
17  
18 [16] National Statistical Office, Malawi, Macro ORC, "Malawi Demographic and Health Survey,"  
19 Zomba: Malawi National Statistical Office, Macro ORC, 2004.  
20  
21 [17] E. Fitzsimons, B. Malde, A. Mesnard and M. Vera-Hernandez, "Nutrition, Information, and  
22 Household Behaviour: Experimental Evidence from Malawi," *Journal of Development*  
23 *Economics*, vol. 122, pp. 113-126, 2016.  
24  
25 [18] B. F. Kalanda, F. H. Verhoeff and B. J. Brabin, "Breast and complementary feeding practices in  
26 relation to morbidity and growth in Malawian infants.," *European journal of clinical nutrition*,  
27 60(3), pp. 401-407, 2006.  
28  
29 [19] A. L. Morrow, M. L. Guerrero, J. Shults, J. Calva, C. Lutter, J. Bravo, G. Ruiz-Palacios, R. Morrow  
30 and F. Butterfoss, "Efficacy of home-based peer counselling to promote exclusive breastfeeding:  
31 a randomised controlled trial.," *The Lancet*, 353(9160), pp. 1226-1231, 1999.  
32  
33 [20] G. Guldan, H. M. X. Fan, Z. Ni, X. Xiang and M. Tang, "Culturally appropriate nutrition education  
34 improves infant feeding and growth in rural Sichuan, China," *Journal of Nutrition*, vol. 130, no. 5,  
35 pp. 1204-11, 2000.  
36  
37 [21] N. Bhandari, S. Mazumder, R. Bahl, J. Martines, R. Black, M. Bhan and I. F. S. Group, "An  
38 educational intervention to promote appropriate complementary feeding practices and physical  
39 growth in infants and young children in rural Haryana, India," *Journal of Nutrition*, vol. 134, no.  
40 9, pp. 2342-8, 2004.  
41  
42 [22] M. Penny, H. Creed-Kanashiro, R. Robert, M. Narro, L. Caulfield and R. Black, "Effectiveness of  
43 an educational intervention delivered through the health services to improve nutrition in young  
44 children: a cluster-randomised controlled trial," *The Lancet*, vol. 365, no. 9474, pp. 1863-72,  
45 2005.  
46  
47 [23] I. Engebretsen, D. Jackson, L. Fadnes, V. Nankabirwa, A. Diallo, T. Doherty, C. Lombard, S.  
48 Swanvelder, J. Nankunda, V. Ramokolo, D. Sanders, H. Wamani, N. Meda, J. Tumwine, E.  
49 Ekstrom, P. Van de Perre, C. Kankasa, H. Sommerfelt and T. Tylleskar, "Growth effects of  
50  
51  
52  
53  
54  
55  
56  
57  
58  
59  
60

- 1  
2  
3 exclusive breastfeeding promotion by peer counsellors in sub-Saharan Africa: the cluster-  
4 randomised PROMISE EBF trial," *BMC Public Health*, vol. 14, no. 1, p. 633, 2014.  
5  
6 [24] N. Bhandari, R. Bahl, B. Nayyar, P. Khokhar, J. Rohde and M. Bhan, "Food supplementation with  
7 encouragement to feed it to infants from 4 to 12 months of age has a small impact on weight  
8 gain," *Journal of Nutrition*, vol. 131, no. 7, pp. 1946-51, 2001.  
9  
10 [25] A. Guyon, V. Quinn, Z. Rambeloson and M. Hainsworth, "Using the Essential Nutrition Actions  
11 Approach to Improve the Nutritional Practices of Women and Children at Scale in Antananarivo  
12 and Fianarantsoa Provinces of Madagascar: Results and Trends 2000 to 2005," USAID, 2006.  
13  
14 [26] A. Mukuria, S. Martin, T. Egondi, A. Bingham and F. Thuita, "Role of social support in improving  
15 infant feeding practices in Western Kenya: A Quasi-Experimental Study," *Global Health, Science  
16 and Practice*, vol. 4, no. 1, pp. 55-72, 2016.  
17  
18 [27] A. DeLorme, E. Gavenus, C. Salmen, G. Benard, B. Mattah, E. Bukusi and K. Fiorella, "Nourishing  
19 networks: A socio-ecological analysis of a network intervention for improving household  
20 nutrition in Western Kenya," *Social Science and Medicine*, vol. 197, pp. 95-103, 2018.  
21  
22 [28] L. Nunes, E. Giugliani, L. Santo and L. de Oliveira, "Reduction of unnecessary intake of water and  
23 herbal teas on breast-fed infants: a randomized clinical trial with adolescent mothers and  
24 grandmothers," *Journal of adolescent health*, vol. 49, no. 3, pp. 258-64, 2011.  
25  
26 [29] C. da Silva, L. Nunes, R. Schwartz and E. Giugliani, "Effect of a pro-breastfeeding intervention on  
27 the maintenance of breastfeeding for 2 years or more: randomized clinical trial with adolescent  
28 mothers and grandmothers," *BMC Pregnancy and Childbirth*, vol. 16, no. 3, p. 97, 2016.  
29  
30 [30] S. Lewycka, C. Mwansambo, P. Kazembe, T. Phiri, A. Mganga, M. Rosato, H. Chapota, F.  
31 Malamba, S. Vergnano, M. Newell, D. Orsin and A. Costello, "A cluster randomised controlled  
32 trial of the community effectiveness of two interventions in rural Malawi to improve health care  
33 and to reduce maternal, newborn and infant mortality," *Trials*, 11(1), 88, 2010.  
34  
35 [31] S. Lewycka, C. Mwansambo, M. Rosato, P. Kazembe, T. Phiri, A. Mganga, H. Chapota, F.  
36 Malamba, E. Kainja, M. Newell, G. Greco, A. Pulkki-Brännström, J. Skordis-Worrall, S. Vergnano,  
37 D. Osrin and A. Costello, "Effect of women's groups and volunteer peer counselling on rates of  
38 mortality, morbidity, and health behaviours in mothers and children in rural Malawi  
39 (MaiMwana): a factorial, cluster-randomised controlled trial.," *The Lancet*, 381(9879), pp. 1721-  
40 1735, 2013.  
41  
42 [32] National Statistical Office, Malawi, "National Population and Housing Census: Analytical  
43 Report," 1998.  
44  
45 [33] G. Reniers and R. Tfaily, "Polygyny and HIV in Malawi.," *Demographic Research*, 19(53), p. 1811,  
46 2008.  
47  
48 [34] T. Takane, "Tobacco and smallholders in Malawi: village case studies in the Mchinji and  
49  
50  
51  
52  
53  
54  
55  
56  
57  
58  
59  
60



- 1  
2  
3                   Mangochi Districts.," *African Research Series*, 93-119., 2005.  
4  
5 [35] WHO Anthro for personal computers, version 3.2.2, *Software for assessing growth and*  
6                   *development of the world's children.*, Geneva: WHO, 2011.  
7  
8 [36] D. Filmer and L. Pritchett, "Estimating wealth effects without expenditure data - or tears: An  
9                   application to educational enrollments in states of India," *Demography*, vol. 38, no. 1, pp. 115-  
10                   132, 2001.  
11  
12 [37] A. C. Cameron, J. B. Gelbach and D. L. Miller, "Bootstrap-based improvements for inference with  
13                   clustered errors.," *The Review of Economics and Statistics*, 90(3), pp. 414-427, 2008.  
14  
15 [38] A. Cameron and D. Miller, "A Practitioner's Guide to Cluster-Robust Inference," *Journal of*  
16                   *Human Resources*, vol. 50, no. 2, pp. 317-372, 2015.  
17  
18 [39] N. K. Gale, G. Heath, E. Cameron, S. Rashid and S. Redwood, "Using the Framework Method for  
19                   the Analysis of Qualitative Data in Multi-Disciplinary Health Research," *BMC Medical Research*  
20                   *Methodology*, vol. 13:117, 2013.  
21  
22 [40] R. G. Lee and T. Garvin, "Moving from information transfer to information exchange in health  
23                   and health care.," *Social science & medicine*, 56(3), pp. 449-464, 2003.  
24  
25 [41] R. Sear, "Kin and child survival in rural Malawi," *Human Nature*, 19(3), pp. 277-293, 2008.  
26  
27  
28  
29  
30  
31  
32  
33  
34  
35  
36  
37  
38  
39  
40  
41  
42  
43  
44  
45  
46  
47  
48  
49  
50  
51  
52  
53  
54  
55  
56  
57  
58  
59  
60

## Tables

**TABLE 1: Distribution of household and women characteristics in controls and differences with treatment group**

|                                                         | Analysis sample                          |                                       |         |
|---------------------------------------------------------|------------------------------------------|---------------------------------------|---------|
|                                                         | Control group<br>(Mean or<br>proportion) | Difference:<br>treatment -<br>control | p value |
| <b>Household characteristics</b>                        |                                          |                                       |         |
| Number of members <sup>a</sup>                          | 5.621                                    | 0.114                                 | 0.875   |
| Number of sleeping rooms <sup>a</sup>                   | 2.036                                    | 0.232                                 | 0.034** |
| Household has electricity? <sup>b</sup>                 | 0.2%                                     | 0.0%                                  | 0.827   |
| Household has radio? <sup>b</sup>                       | 65.1%                                    | 0.4%                                  | 0.897   |
| Household has bicycle? <sup>b</sup>                     | 49.9%                                    | 1.9%                                  | 0.699   |
| Household has motorbike? <sup>b</sup>                   | 0.8%                                     | -0.1%                                 | 0.879   |
| Household has paraffin lamp? <sup>b</sup>               | 93.9%                                    | 1.7%                                  | 0.815   |
| Household has oxcart? <sup>b</sup>                      | 5.1%                                     | -1.9%                                 | 0.198   |
| Agricultural household <sup>b</sup>                     | 100%                                     | -0.2%                                 | 0.422   |
| Main flooring material: dirt, sand or dung <sup>b</sup> | 92.4%                                    | -1.7%                                 | 0.565   |
| Main roofing material: natural material <sup>b</sup>    | 87.6%                                    | -1.7%                                 | 0.697   |
| Piped water <sup>b</sup>                                | 1.5%                                     | 2.2%                                  | 0.494   |
| Traditional pit toilet <sup>b</sup>                     | 78.3%                                    | 4.4%                                  | 0.356   |
| Wealth index <sup>a</sup>                               | -0.087                                   | 0.034                                 | 0.897   |
| <b>Woman characteristics</b>                            |                                          |                                       |         |
| Married <sup>b</sup>                                    | 71.8%                                    | -4.9%                                 | 0.046** |
| Completed primary education <sup>b</sup>                | 70.9%                                    | 2.8%                                  | 0.529   |
| Completed secondary education <sup>b</sup>              | 7.6%                                     | -2.2%                                 | 0.268   |
| Age <sup>a</sup>                                        | 24.592                                   | -0.993                                | 0.026** |
| Chewa <sup>b</sup>                                      | 95.4%                                    | -3.9%                                 | 0.452   |
| Christian <sup>b</sup>                                  | 98.3%                                    | 0.5%                                  | 0.609   |
| Farmer <sup>b</sup>                                     | 70.9%                                    | -4.5%                                 | 0.316   |
| Student <sup>b</sup>                                    | 16.4%                                    | 2.3%                                  | 0.380   |
| Small business owner <sup>b</sup>                       | 4.0%                                     | 2.1%                                  | 0.356   |
| N                                                       | 411                                      | 475                                   |         |

Notes: Household and mother level characteristics in 2004 corresponding to married main respondent mothers present in the second follow-up survey with children born after the intervention began in July 2005. <sup>a</sup> Continuous variable who which the mean is reported; <sup>b</sup> Binary variable, for which proportions are reported.

\*= p<0.1, \*\*=p<0.05, \*\*\*=p<0.01. p values are calculated using the wild cluster bootstrap-t procedure outlined in Cameron et al. (2008).

**TABLE 2: Distribution of family networks indicators in controls and differences with treatment group for sampled children.**

|                                   | Control group | Difference:<br>treatment -<br>control | p value | N    |
|-----------------------------------|---------------|---------------------------------------|---------|------|
| Maternal grandmother <sup>a</sup> | 87.3%         | 1.2%                                  | 0.739   | 2260 |
| Paternal grandmother <sup>a</sup> | 80.7%         | 6.3%                                  | 0.132   | 2252 |
| Mother's sisters <sup>b</sup>     | 2.835         | 0.047                                 | 0.835   | 2266 |
| Mother's brothers <sup>b</sup>    | 2.556         | 0.207                                 | 0.180   | 2263 |
| Father's sisters <sup>b</sup>     | 2.336         | 0.246                                 | 0.290   | 2266 |
| Father's brothers <sup>b</sup>    | 2.453         | 0.213                                 | 0.288   | 2267 |

Notes: <sup>a</sup>Binary variable for which percentages are reported. <sup>b</sup>Discrete, non-binary variables for which mean values are reported. Sample includes all children born since July 2005, who were aged 0-53 months at the time of interview, and whose mothers were married main respondents to the follow up surveys in 2008-09 and 2009-10. A pooled dataset from both follow-up surveys is used to construct means.

**Table 3: Relationship between baseline characteristics and family network size, with p-values****Panel A: Household characteristics**

|                                  | Number of members | Number of rooms | wealth Index |
|----------------------------------|-------------------|-----------------|--------------|
| Maternal grandmother alive (0/1) | 0.027             | -0.04           | 0.256**      |
| SE                               | (0.307)           | (0.103)         | (0.114)      |
| Cluster wild bootstrap t p-value | {0.929}           | {0.779}         | {0.032}      |
| Paternal grandmother alive (0/1) | -0.209            | -0.02           | -0.129       |
| SE                               | (0.276)           | (0.094)         | (0.186)      |
| Cluster wild bootstrap t p-value | {0.478}           | {0.919}         | {0.549}      |
| Parents siblings alive           | 0.025             | 0.01            | 0.016        |
| SE                               | (0.037)           | (0.011)         | (0.011)      |
| Cluster wild bootstrap t p-value | {0.627}           | {0.400}         | {0.144}      |
| N                                | 881               | 879             | 881          |

**Panel B: Mother characteristics**

|                                  | Primary education | Secondary education | Age       | Chewa   | Christian | Farmer  | Student   | Small business owner |
|----------------------------------|-------------------|---------------------|-----------|---------|-----------|---------|-----------|----------------------|
| Maternal grandmother alive       | 0.124*            | -0.028              | -4.463*** | 0.01    | -0.007    | -0.111* | 0.150***  | -0.046               |
| SE                               | (0.057)           | (0.033)             | (0.687)   | (0.039) | (0.010)   | (0.054) | (0.033)   | (0.029)              |
| Cluster wild bootstrap t p-value | {0.056}           | {0.396}             | {0.002}   | {0.863} | {0.657}   | {0.056} | {0.002}   | {0.160}              |
| Paternal grandmother alive       | 0.071**           | -0.004              | -2.845*** | 0.005   | 0.009     | -0.01   | 0.04      | -0.024               |
| SE                               | (0.032)           | (0.029)             | (0.563)   | (0.023) | (0.012)   | (0.036) | (0.024)   | (0.027)              |
| Cluster wild bootstrap t p-value | {0.028}           | {0.871}             | {0.002}   | {0.853} | {0.569}   | {0.739} | {0.104}   | {0.370}              |
| Parents siblings alive           | -0.004            | 0                   | 0.044     | 0.007   | 0         | 0.012** | -0.011*** | -0.003*              |
| SE                               | (0.004)           | (0.002)             | (0.069)   | (0.005) | (0.001)   | (0.004) | (0.003)   | (0.001)              |
| Cluster wild bootstrap t p-value | {0.346}           | {0.925}             | {0.537}   | {0.228} | {0.462}   | {0.024} | {0.004}   | {0.074}              |
| N                                | 881               | 881                 | 881       | 881     | 881       | 881     | 881       | 881                  |

Notes: OLS regressions of with baseline characteristics gathered in 2004 as the dependent variable and family networks as independent variables. Sample contains married main respondent mothers present in the second follow-up survey with children born after the intervention began in July 2005.. Standard errors computed using the cluster correlated Huber-White estimator are reported in parentheses and p-values in curly brackets. P values are calculated using the wild cluster bootstrap-t procedure outlined in Cameron et al. (2008). The wealth index was calculated using principal components analysis as recommended by [36].

\*= p<0.1, \*\*=p<0.05, \*\*\*=p<0.01

**TABLE 4: Estimated effects on height-for-age z-scores with 95% confidence intervals from three linear regression models**

|                            | Model 1     |                         | Model 2     |                         | Model 3     |                         |
|----------------------------|-------------|-------------------------|-------------|-------------------------|-------------|-------------------------|
|                            | Coefficient | 95% Confidence Interval | Coefficient | 95% Confidence Interval | Coefficient | 95% Confidence Interval |
| Treatment                  | 0.296***    | [0.116, 0.484]          | 0.441       | [-0.335, 1.028]         | 0.467       | [-0.344, 1.050]         |
| Maternal grandmother       |             |                         | -0.265**    | [-0.528, -0.021]        | -0.259**    | [-0.503, -0.019]        |
| Maternal grandmother*T     |             |                         | 0.168       | [-0.296, 0.615]         | 0.145       | [-0.324, 0.575]         |
| Paternal grandmother       |             |                         | 0.008       | [-0.200, 0.236]         | 0.006       | [-0.192, 0.238]         |
| Paternal grandmother*T     |             |                         | -0.253*     | [-0.529, 0.029]         | -0.235*     | [-0.493, 0.039]         |
| Mothers sisters            |             |                         | 0.031       | [-0.052, 0.103]         |             |                         |
| Mothers sisters*T          |             |                         | -0.056      | [-0.163, 0.057]         |             |                         |
| Fathers sisters            |             |                         | 0.002       | [-0.140, 0.140]         |             |                         |
| Fathers sisters*T          |             |                         | 0.042       | [-0.110, 0.188]         |             |                         |
| Mothers brothers           |             |                         | -0.001      | [-0.116, 0.082]         |             |                         |
| Mothers brothers*T         |             |                         | 0.024       | [-0.109, 0.170]         |             |                         |
| Fathers brothers           |             |                         | 0.016       | [-0.064, 0.115]         |             |                         |
| Fathers brothers*T         |             |                         | -0.034      | [-0.148, 0.075]         |             |                         |
| Total siblings of mother   |             |                         |             |                         | 0.016       | [-0.032, 0.062]         |
| Total siblings of mother*T |             |                         |             |                         | -0.019      | [-0.069, 0.037]         |
| Total siblings of father   |             |                         |             |                         | 0.01        | [-0.038, 0.054]         |
| Total siblings of father*T |             |                         |             |                         | 0.001       | [-0.080, 0.072]         |
| R-Squared                  | 0.19        |                         | 0.195       |                         | 0.193       |                         |
| N                          | 2017        |                         | 2017        |                         | 2017        |                         |

Table notes: OLS regressions with height for age (HAZ) scores as dependent variable. Model 1 estimates the overall effect of exposure to the program. Models 2 and 3 estimate regressions that allow the program effect to vary with different extended family members. Inference is conducted using the wild cluster bootstrap-t procedure recommended by Cameron et al (2008). 95% confidence intervals calculated according to the method recommended in Cameron and Miller (2015).

All regressions include the following controls: Cluster level controls: Education and Chewa ethnicity in 2004, Household level controls: A wealth index calculated in 2004, Mother level controls: Whether she had completed primary school, was working as a farmer or was a student in 2004, current age, age<sup>2</sup> and logarithmic height. Child level controls: Month of measurement, age, age<sup>2</sup>, gender, number of older siblings, number of older siblings<sup>2</sup>.

Sample includes all children born after the intervention start date in July 2005 to married main respondent mothers, who were aged 0-53 months at the time of measurement. Column 1 indicates the effect of intervention assignment on HAZ scores, for the sample where family networks information is not missing. Models 2-3 indicate how intervention effects on HAZ scores vary with the presence of different extended family members. \*= p<0.1, \*\*=p<0.05, \*\*\*=p<0.01

Appendix 1

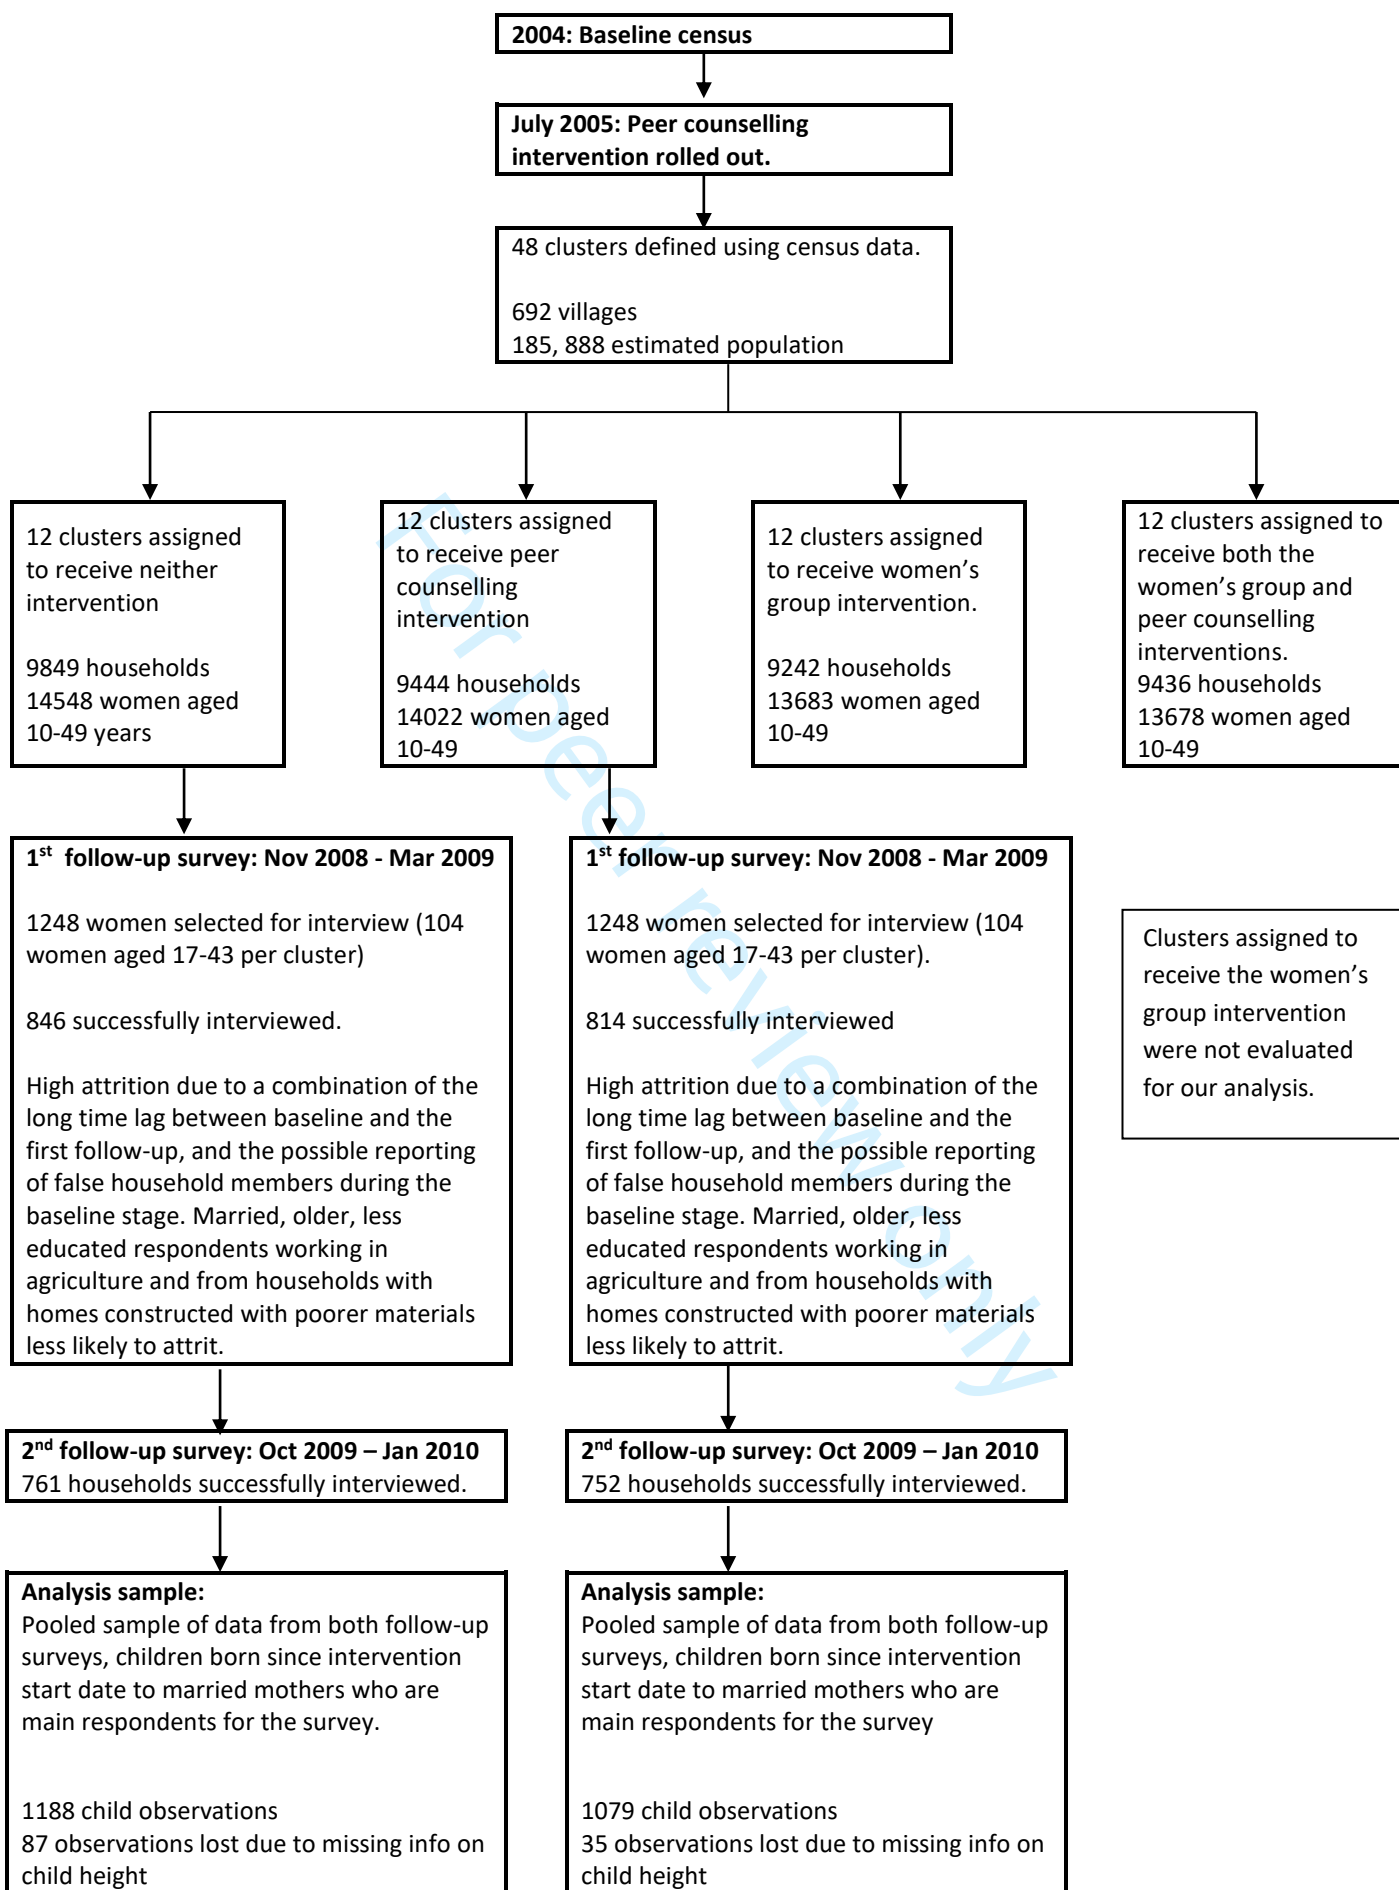

STROBE Statement—Checklist of items that should be included in reports of *case-control studies*

|                              | Item No | Recommendation                                                                                                                                                                                    | Complete?             |
|------------------------------|---------|---------------------------------------------------------------------------------------------------------------------------------------------------------------------------------------------------|-----------------------|
| <b>Title and abstract</b>    | 1       | (a) Indicate the study's design with a commonly used term in the title or the abstract                                                                                                            | ✓                     |
|                              |         | (b) Provide in the abstract an informative and balanced summary of what was done and what was found                                                                                               | ✓ (pg 2)              |
| <b>Introduction</b>          |         |                                                                                                                                                                                                   |                       |
| Background/rationale         | 2       | Explain the scientific background and rationale for the investigation being reported                                                                                                              | ✓ (pg 4-5)            |
| Objectives                   | 3       | State specific objectives, including any prespecified hypotheses                                                                                                                                  | ✓ (pg 6)              |
| <b>Methods</b>               |         |                                                                                                                                                                                                   |                       |
| Study design                 | 4       | Present key elements of study design early in the paper                                                                                                                                           | ✓ (pg 6 – 7)          |
| Setting                      | 5       | Describe the setting, locations, and relevant dates, including periods of recruitment, exposure, follow-up, and data collection                                                                   | ✓ (pg 6 - 9, 12 - 13) |
| Participants                 | 6       | (a) Give the eligibility criteria, and the sources and methods of case ascertainment and control selection. Give the rationale for the choice of cases and controls                               | ✓ (pg 6-9)            |
|                              |         | (b) For matched studies, give matching criteria and the number of controls per case                                                                                                               |                       |
| Variables                    | 7       | Clearly define all outcomes, exposures, predictors, potential confounders, and effect modifiers. Give diagnostic criteria, if applicable                                                          | ✓ (pg 8-9)            |
| Data sources/<br>measurement | 8*      | For each variable of interest, give sources of data and details of methods of assessment (measurement). Describe comparability of assessment methods if there is more than one group              | ✓ (pg 8-9)            |
| Bias                         | 9       | Describe any efforts to address potential sources of bias                                                                                                                                         | ✓ (pg 9-12)           |
| Study size                   | 10      | Explain how the study size was arrived at                                                                                                                                                         |                       |
| Quantitative variables       | 11      | Explain how quantitative variables were handled in the analyses. If applicable, describe which groupings were chosen and why                                                                      | ✓ (pg 8-9)            |
| Statistical methods          | 12      | (a) Describe all statistical methods, including those used to control for confounding                                                                                                             | ✓ (pg 9-12)           |
|                              |         | (b) Describe any methods used to examine subgroups and interactions                                                                                                                               | ✓ (pg 9-12)           |
|                              |         | (c) Explain how missing data were addressed                                                                                                                                                       | ✓ (pg 8-9)            |
|                              |         | (d) If applicable, explain how matching of cases and controls was addressed                                                                                                                       |                       |
|                              |         | (e) Describe any sensitivity analyses                                                                                                                                                             | ✓ (pg 9-12)           |
| <b>Results</b>               |         |                                                                                                                                                                                                   |                       |
| Participants                 | 13*     | (a) Report numbers of individuals at each stage of study—eg numbers potentially eligible, examined for eligibility, confirmed eligible, included in the study, completing follow-up, and analysed | ✓<br>(Appendix 1)     |
|                              |         | (b) Give reasons for non-participation at each stage                                                                                                                                              | ✓<br>(Appendix 1)     |
|                              |         | (c) Consider use of a flow diagram                                                                                                                                                                | ✓<br>(Appendix 1)     |
| Descriptive data             | 14*     | (a) Give characteristics of study participants (eg demographic, clinical,                                                                                                                         | ✓ (Table 1)           |

|                          |     |                                                                                                                                                                                                              |                |
|--------------------------|-----|--------------------------------------------------------------------------------------------------------------------------------------------------------------------------------------------------------------|----------------|
|                          |     | social) and information on exposures and potential confounders                                                                                                                                               |                |
|                          |     | (b) Indicate number of participants with missing data for each variable of interest                                                                                                                          | ✓ (Appendix 1) |
| Outcome data             | 15* | Report numbers in each exposure category, or summary measures of exposure                                                                                                                                    | ✓ (Table 1)    |
| Main results             | 16  | (a) Give unadjusted estimates and, if applicable, confounder-adjusted estimates and their precision (eg, 95% confidence interval). Make clear which confounders were adjusted for and why they were included | ✓ (Table 4)    |
|                          |     | (b) Report category boundaries when continuous variables were categorized                                                                                                                                    | ✓              |
|                          |     | (c) If relevant, consider translating estimates of relative risk into absolute risk for a meaningful time period                                                                                             |                |
| Other analyses           | 17  | Report other analyses done—eg analyses of subgroups and interactions, and sensitivity analyses                                                                                                               | ✓ (Table 4)    |
| <b>Discussion</b>        |     |                                                                                                                                                                                                              |                |
| Key results              | 18  | Summarise key results with reference to study objectives                                                                                                                                                     | ✓ (pg 14 - 16) |
| Limitations              | 19  | Discuss limitations of the study, taking into account sources of potential bias or imprecision. Discuss both direction and magnitude of any potential bias                                                   | ✓ (pg 19)      |
| Interpretation           | 20  | Give a cautious overall interpretation of results considering objectives, limitations, multiplicity of analyses, results from similar studies, and other relevant evidence                                   | ✓ (pg 16 – 19) |
| Generalisability         | 21  | Discuss the generalisability (external validity) of the study results                                                                                                                                        | ✓ (pg 16-19)   |
| <b>Other information</b> |     |                                                                                                                                                                                                              |                |
| Funding                  | 22  | Give the source of funding and the role of the funders for the present study and, if applicable, for the original study on which the present article is based                                                | ✓ (pg 20)      |

\*Give information separately for cases and controls.

**Note:** An Explanation and Elaboration article discusses each checklist item and gives methodological background and published examples of transparent reporting. The STROBE checklist is best used in conjunction with this article (freely available on the Web sites of PLoS Medicine at <http://www.plosmedicine.org/>, Annals of Internal Medicine at <http://www.annals.org/>, and Epidemiology at <http://www.epidem.com/>). Information on the STROBE Initiative is available at <http://www.strobe-statement.org>.
