# Supplementary material for: Family networks and infant health promotion: a mixed-methods evaluation from a cluster randomised controlled trial in rural Malawi
Source: PubMed Central journal article supplement (PMC6009513; doi:10.1136/bmjopen-2017-019380), 2018-06-07

**Appendix 1**

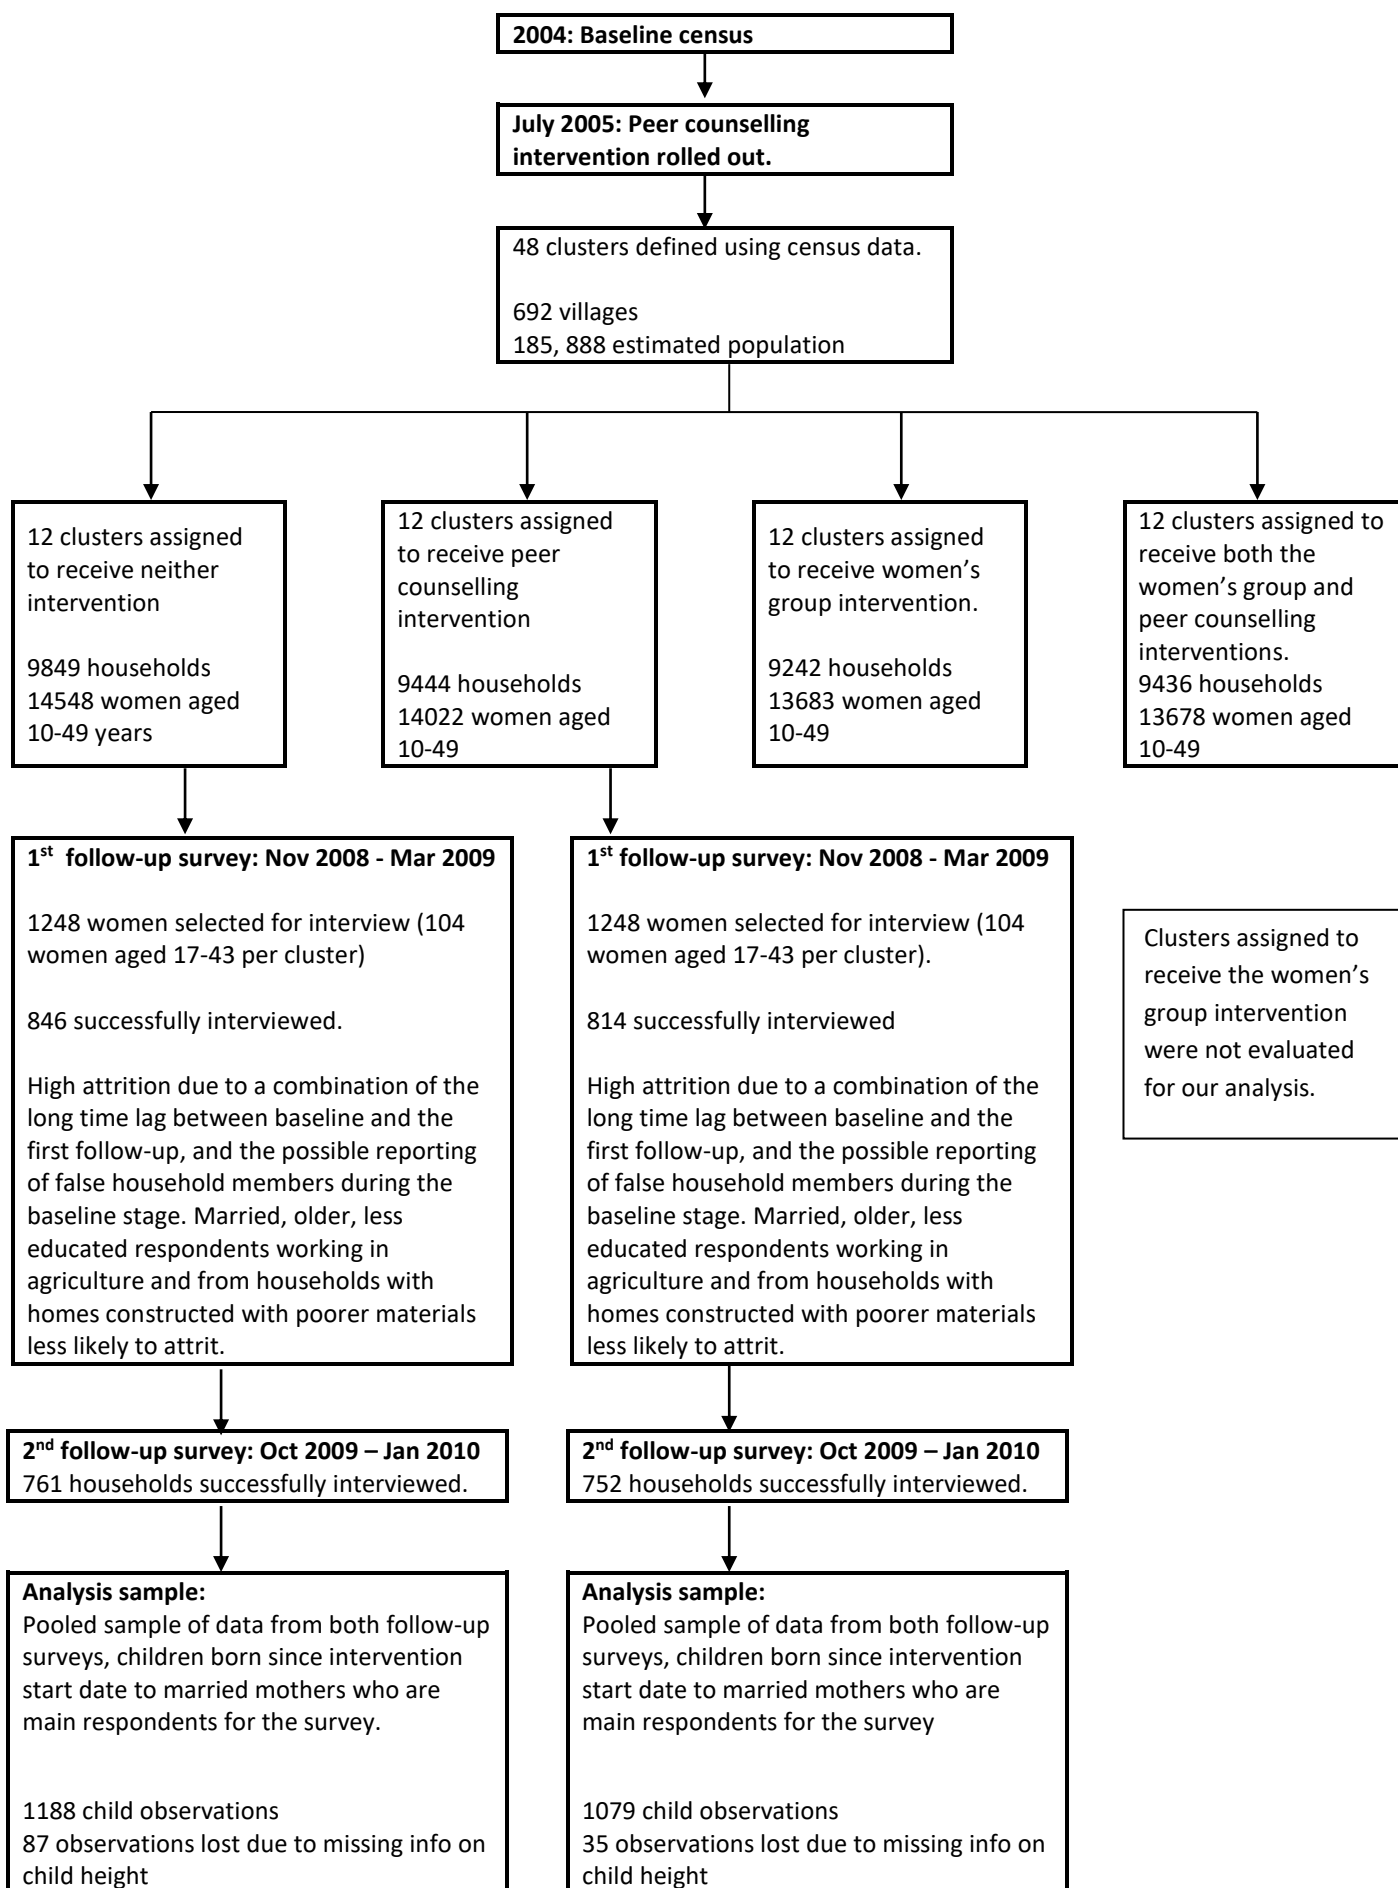

Supplement: bmjopen-2017-019380supp001.pdf [file bmjopen-2017-019380supp001.pdf]
